# Supplementary material
Source: publisher site journal article supplement (https://www.dovepress.com/get_supplementary_file.php?f=171293.xlsx)
Supplement: Supplementary file 1 [file get_supplementary_file.php]

## Sheet: Table S1
NAME	GS<br> follow link to MSigDB	GS DETAILS	SIZE	ES	NES	NOM p-val	FDR q-val	FWER p-val	RANK AT MAX	LEADING EDGE
GO_CHROMOSOMAL_REGION	GO_CHROMOSOMAL_REGION	Details ...	290	0.714969	2.5004	<0.0001	<0.0001	<0.0001	4187	tags=56%, list=13%, signal=63%
GO_DNA_RECOMBINATION	GO_DNA_RECOMBINATION	Details ...	189	0.687336	2.49732	<0.0001	<0.0001	<0.0001	1510	tags=40%, list=5%, signal=42%
GO_ORGANELLE_FISSION	GO_ORGANELLE_FISSION	Details ...	451	0.654	2.49173	<0.0001	<0.0001	<0.0001	3468	tags=43%, list=11%, signal=48%
GO_DNA_REPAIR	GO_DNA_REPAIR	Details ...	440	0.636115	2.48912	<0.0001	<0.0001	<0.0001	5552	tags=50%, list=17%, signal=60%
GO_CELL_DIVISION	GO_CELL_DIVISION	Details ...	426	0.656336	2.48745	<0.0001	<0.0001	<0.0001	5518	tags=55%, list=17%, signal=66%
GO_CONDENSED_CHROMOSOME	GO_CONDENSED_CHROMOSOME	Details ...	169	0.741574	2.48012	<0.0001	<0.0001	<0.0001	2655	tags=50%, list=8%, signal=55%
GO_CELL_CYCLE_PHASE_TRANSITION	GO_CELL_CYCLE_PHASE_TRANSITION	Details ...	248	0.674594	2.4596	<0.0001	<0.0001	<0.0001	4473	tags=53%, list=14%, signal=61%
GO_MITOTIC_NUCLEAR_DIVISION	GO_MITOTIC_NUCLEAR_DIVISION	Details ...	339	0.685399	2.45268	<0.0001	<0.0001	<0.0001	3468	tags=48%, list=11%, signal=53%
GO_CHROMOSOME_TELOMERIC_REGION	GO_CHROMOSOME_TELOMERIC_REGION	Details ...	143	0.681297	2.4443	<0.0001	<0.0001	<0.0001	4060	tags=51%, list=13%, signal=58%
GO_SPINDLE	GO_SPINDLE	Details ...	266	0.644047	2.43851	<0.0001	<0.0001	<0.0001	3468	tags=41%, list=11%, signal=46%
GO_DNA_REPLICATION	GO_DNA_REPLICATION	Details ...	193	0.712987	2.43812	<0.0001	<0.0001	<0.0001	2444	tags=48%, list=8%, signal=51%
GO_CHROMOSOME_SEGREGATION	GO_CHROMOSOME_SEGREGATION	Details ...	246	0.714427	2.42982	<0.0001	<0.0001	<0.0001	2721	tags=49%, list=9%, signal=53%
GO_CELL_CYCLE_CHECKPOINT	GO_CELL_CYCLE_CHECKPOINT	Details ...	180	0.678332	2.4283	<0.0001	<0.0001	<0.0001	4243	tags=49%, list=13%, signal=57%
GO_DNA_CONFORMATION_CHANGE	GO_DNA_CONFORMATION_CHANGE	Details ...	237	0.679642	2.42786	<0.0001	<0.0001	<0.0001	4062	tags=54%, list=13%, signal=61%
GO_NUCLEAR_CHROMOSOME_SEGREGATION	GO_NUCLEAR_CHROMOSOME_SEGREGATION	Details ...	203	0.73019	2.4235	<0.0001	<0.0001	<0.0001	2721	tags=51%, list=9%, signal=56%
GO_CELL_CYCLE_G1_S_PHASE_TRANSITION	GO_CELL_CYCLE_G1_S_PHASE_TRANSITION	Details ...	108	0.741089	2.41968	<0.0001	<0.0001	<0.0001	4396	tags=62%, list=14%, signal=72%
GO_REGULATION_OF_MICROTUBULE_BASED_PROCESS	GO_REGULATION_OF_MICROTUBULE_BASED_PROCESS	Details ...	227	0.638751	2.41778	<0.0001	<0.0001	<0.0001	5093	tags=50%, list=16%, signal=59%
GO_MEIOTIC_CELL_CYCLE	GO_MEIOTIC_CELL_CYCLE	Details ...	160	0.631885	2.41609	<0.0001	<0.0001	<0.0001	5261	tags=51%, list=17%, signal=61%
GO_NUCLEAR_CHROMOSOME	GO_NUCLEAR_CHROMOSOME	Details ...	481	0.590488	2.412	<0.0001	<0.0001	<0.0001	6125	tags=52%, list=19%, signal=64%
GO_MITOTIC_CELL_CYCLE_CHECKPOINT	GO_MITOTIC_CELL_CYCLE_CHECKPOINT	Details ...	129	0.67255	2.40489	<0.0001	<0.0001	<0.0001	2311	tags=40%, list=7%, signal=43%
GO_MEIOTIC_CELL_CYCLE_PROCESS	GO_MEIOTIC_CELL_CYCLE_PROCESS	Details ...	128	0.632246	2.40333	<0.0001	<0.0001	<0.0001	3162	tags=41%, list=10%, signal=46%
GO_G2_DNA_DAMAGE_CHECKPOINT	GO_G2_DNA_DAMAGE_CHECKPOINT	Details ...	32	0.77052	2.4031	<0.0001	<0.0001	<0.0001	2172	tags=47%, list=7%, signal=50%
GO_REGULATION_OF_NUCLEAR_DIVISION	GO_REGULATION_OF_NUCLEAR_DIVISION	Details ...	152	0.642702	2.40224	<0.0001	<0.0001	<0.0001	2655	tags=39%, list=8%, signal=42%
GO_REGULATION_OF_MICROTUBULE_POLYMERIZATION_OR_DEPOLYMERIZATION	GO_REGULATION_OF_MICROTUBULE_POLYMERIZATION_OR_DEPOLYMERIZATION	Details ...	165	0.658896	2.39314	<0.0001	<0.0001	<0.0001	5093	tags=55%, list=16%, signal=65%
GO_RECOMBINATIONAL_REPAIR	GO_RECOMBINATIONAL_REPAIR	Details ...	71	0.70918	2.39147	<0.0001	<0.0001	<0.0001	1960	tags=42%, list=6%, signal=45%
GO_DNA_INTEGRITY_CHECKPOINT	GO_DNA_INTEGRITY_CHECKPOINT	Details ...	137	0.660381	2.38991	<0.0001	<0.0001	<0.0001	4147	tags=47%, list=13%, signal=54%
GO_DOUBLE_STRAND_BREAK_REPAIR	GO_DOUBLE_STRAND_BREAK_REPAIR	Details ...	152	0.658715	2.38914	<0.0001	<0.0001	<0.0001	3954	tags=45%, list=12%, signal=52%
GO_CONDENSED_NUCLEAR_CHROMOSOME	GO_CONDENSED_NUCLEAR_CHROMOSOME	Details ...	74	0.705579	2.37979	<0.0001	<0.0001	<0.0001	4454	tags=53%, list=14%, signal=61%
GO_DNA_SYNTHESIS_INVOLVED_IN_DNA_REPAIR	GO_DNA_SYNTHESIS_INVOLVED_IN_DNA_REPAIR	Details ...	69	0.731056	2.37814	<0.0001	<0.0001	<0.0001	1510	tags=45%, list=5%, signal=47%
GO_NEGATIVE_REGULATION_OF_MITOTIC_CELL_CYCLE	GO_NEGATIVE_REGULATION_OF_MITOTIC_CELL_CYCLE	Details ...	183	0.600396	2.36707	<0.0001	2.84702e-05	0.001	2311	tags=34%, list=7%, signal=36%
GO_NUCLEAR_CHROMOSOME_TELOMERIC_REGION	GO_NUCLEAR_CHROMOSOME_TELOMERIC_REGION	Details ...	116	0.684763	2.36549	<0.0001	2.75518e-05	0.001	4060	tags=52%, list=13%, signal=59%
GO_SPINDLE_POLE	GO_SPINDLE_POLE	Details ...	113	0.685225	2.34863	<0.0001	8.22617e-05	0.002	4828	tags=58%, list=15%, signal=68%
GO_CHROMOSOME_CENTROMERIC_REGION	GO_CHROMOSOME_CENTROMERIC_REGION	Details ...	153	0.74373	2.34484	<0.0001	7.97689e-05	0.002	4187	tags=61%, list=13%, signal=70%
GO_TELOMERE_ORGANIZATION	GO_TELOMERE_ORGANIZATION	Details ...	97	0.68564	2.34467	<0.0001	7.74228e-05	0.002	6050	tags=64%, list=19%, signal=79%
GO_DNA_PACKAGING	GO_DNA_PACKAGING	Details ...	161	0.669293	2.34347	<0.0001	7.52107e-05	0.002	3676	tags=52%, list=12%, signal=59%
GO_MITOTIC_SPINDLE	GO_MITOTIC_SPINDLE	Details ...	50	0.738657	2.34091	<0.0001	7.31215e-05	0.002	2385	tags=46%, list=8%, signal=50%
GO_SISTER_CHROMATID_SEGREGATION	GO_SISTER_CHROMATID_SEGREGATION	Details ...	162	0.76526	2.33917	<0.0001	7.11452e-05	0.002	2661	tags=57%, list=8%, signal=62%
GO_REGULATION_OF_CELL_DIVISION	GO_REGULATION_OF_CELL_DIVISION	Details ...	246	0.577935	2.33724	<0.0001	6.9273e-05	0.002	4248	tags=40%, list=13%, signal=46%
GO_CELL_CYCLE_G2_M_PHASE_TRANSITION	GO_CELL_CYCLE_G2_M_PHASE_TRANSITION	Details ...	134	0.621616	2.33632	<0.0001	6.74968e-05	0.002	4473	tags=46%, list=14%, signal=53%
GO_DNA_BIOSYNTHETIC_PROCESS	GO_DNA_BIOSYNTHETIC_PROCESS	Details ...	110	0.678176	2.3283	<0.0001	6.58093e-05	0.002	1510	tags=40%, list=5%, signal=42%
GO_REGULATION_OF_MITOTIC_CELL_CYCLE	GO_REGULATION_OF_MITOTIC_CELL_CYCLE	Details ...	443	0.570089	2.32467	<0.0001	6.42042e-05	0.002	2875	tags=36%, list=9%, signal=39%
GO_MITOTIC_DNA_INTEGRITY_CHECKPOINT	GO_MITOTIC_DNA_INTEGRITY_CHECKPOINT	Details ...	93	0.65037	2.32026	<0.0001	6.26756e-05	0.002	4147	tags=47%, list=13%, signal=54%
GO_MITOTIC_RECOMBINATION	GO_MITOTIC_RECOMBINATION	Details ...	41	0.831434	2.3135	<0.0001	8.07161e-05	0.003	1505	tags=66%, list=5%, signal=69%
GO_NEGATIVE_REGULATION_OF_CELL_DIVISION	GO_NEGATIVE_REGULATION_OF_CELL_DIVISION	Details ...	56	0.71558	2.30906	<0.0001	7.88816e-05	0.003	2002	tags=43%, list=6%, signal=46%
GO_SPINDLE_ASSEMBLY	GO_SPINDLE_ASSEMBLY	Details ...	68	0.700862	2.30762	<0.0001	7.71287e-05	0.003	5093	tags=60%, list=16%, signal=72%
GO_KINETOCHORE	GO_KINETOCHORE	Details ...	103	0.758018	2.30721	<0.0001	7.5452e-05	0.003	3956	tags=61%, list=12%, signal=70%
GO_MIDBODY	GO_MIDBODY	Details ...	121	0.641164	2.3045	<0.0001	7.38466e-05	0.003	2421	tags=36%, list=8%, signal=39%
GO_DNA_GEOMETRIC_CHANGE	GO_DNA_GEOMETRIC_CHANGE	Details ...	78	0.74323	2.30361	<0.0001	7.23082e-05	0.003	3984	tags=60%, list=13%, signal=69%
GO_PROTEIN_DNA_COMPLEX	GO_PROTEIN_DNA_COMPLEX	Details ...	145	0.670704	2.30309	<0.0001	7.08325e-05	0.003	5033	tags=61%, list=16%, signal=73%
GO_REGULATION_OF_CYTOKINESIS	GO_REGULATION_OF_CYTOKINESIS	Details ...	54	0.699333	2.29581	<0.0001	9.41449e-05	0.004	5873	tags=61%, list=18%, signal=75%
GO_NEGATIVE_REGULATION_OF_CELL_CYCLE_PROCESS	GO_NEGATIVE_REGULATION_OF_CELL_CYCLE_PROCESS	Details ...	199	0.58022	2.2948	<0.0001	0.000109046	0.004	5519	tags=48%, list=17%, signal=57%
GO_MITOTIC_SISTER_CHROMATID_SEGREGATION	GO_MITOTIC_SISTER_CHROMATID_SEGREGATION	Details ...	88	0.771066	2.29336	<0.0001	0.000106949	0.004	2661	tags=59%, list=8%, signal=64%
GO_CONDENSED_CHROMOSOME_CENTROMERIC_REGION	GO_CONDENSED_CHROMOSOME_CENTROMERIC_REGION	Details ...	83	0.801811	2.29194	<0.0001	0.000104931	0.004	2645	tags=60%, list=8%, signal=66%
GO_DNA_DEPENDENT_DNA_REPLICATION	GO_DNA_DEPENDENT_DNA_REPLICATION	Details ...	90	0.757654	2.28753	<0.0001	0.000102988	0.004	2356	tags=57%, list=7%, signal=61%
GO_SPINDLE_MICROTUBULE	GO_SPINDLE_MICROTUBULE	Details ...	56	0.719405	2.2875	<0.0001	0.000101116	0.004	5049	tags=64%, list=16%, signal=76%
GO_MITOTIC_SPINDLE_ORGANIZATION	GO_MITOTIC_SPINDLE_ORGANIZATION	Details ...	64	0.753132	2.28335	<0.0001	0.000115813	0.004	2661	tags=55%, list=8%, signal=60%
GO_REGULATION_OF_PROTEIN_COMPLEX_DISASSEMBLY	GO_REGULATION_OF_PROTEIN_COMPLEX_DISASSEMBLY	Details ...	199	0.600842	2.27938	<0.0001	0.000128765	0.004	5093	tags=47%, list=16%, signal=56%
GO_POSITIVE_REGULATION_OF_DNA_METABOLIC_PROCESS	GO_POSITIVE_REGULATION_OF_DNA_METABOLIC_PROCESS	Details ...	175	0.545727	2.27869	<0.0001	0.000126545	0.004	3014	tags=34%, list=9%, signal=37%
GO_MEIOSIS_I	GO_MEIOSIS_I	Details ...	72	0.594972	2.27731	<0.0001	0.0001244	0.004	3606	tags=40%, list=11%, signal=45%
GO_REGULATION_OF_CENTROSOME_CYCLE	GO_REGULATION_OF_CENTROSOME_CYCLE	Details ...	38	0.782923	2.27468	<0.0001	0.000170114	0.007	4201	tags=68%, list=13%, signal=79%
GO_DAMAGED_DNA_BINDING	GO_DAMAGED_DNA_BINDING	Details ...	62	0.671667	2.27449	<0.0001	0.000167325	0.007	4102	tags=53%, list=13%, signal=61%
GO_POSITIVE_REGULATION_OF_CELL_CYCLE_PROCESS	GO_POSITIVE_REGULATION_OF_CELL_CYCLE_PROCESS	Details ...	224	0.553868	2.27385	<0.0001	0.000164626	0.007	2507	tags=32%, list=8%, signal=34%
GO_SPINDLE_MIDZONE	GO_SPINDLE_MIDZONE	Details ...	25	0.840937	2.2728	<0.0001	0.000162013	0.007	1988	tags=60%, list=6%, signal=64%
GO_NEGATIVE_REGULATION_OF_CELL_CYCLE_PHASE_TRANSITION	GO_NEGATIVE_REGULATION_OF_CELL_CYCLE_PHASE_TRANSITION	Details ...	137	0.599981	2.27269	<0.0001	0.000159481	0.007	5651	tags=51%, list=18%, signal=62%
GO_CYTOKINESIS	GO_CYTOKINESIS	Details ...	81	0.683812	2.27036	<0.0001	0.000157028	0.007	2721	tags=41%, list=9%, signal=44%
GO_NEGATIVE_REGULATION_OF_PROTEIN_COMPLEX_DISASSEMBLY	GO_NEGATIVE_REGULATION_OF_PROTEIN_COMPLEX_DISASSEMBLY	Details ...	156	0.604359	2.26405	<0.0001	0.000190048	0.01	5093	tags=47%, list=16%, signal=56%
GO_REGULATION_OF_DNA_REPAIR	GO_REGULATION_OF_DNA_REPAIR	Details ...	70	0.632386	2.26257	<0.0001	0.000187212	0.01	3823	tags=46%, list=12%, signal=52%
GO_CHROMATIN	GO_CHROMATIN	Details ...	401	0.531725	2.25784	<0.0001	0.000210614	0.012	6125	tags=48%, list=19%, signal=59%
GO_GENE_SILENCING_BY_RNA	GO_GENE_SILENCING_BY_RNA	Details ...	122	0.613041	2.25413	<0.0001	0.000207562	0.012	5607	tags=53%, list=18%, signal=64%
GO_REGULATION_OF_SIGNAL_TRANSDUCTION_BY_P53_CLASS_MEDIATOR	GO_REGULATION_OF_SIGNAL_TRANSDUCTION_BY_P53_CLASS_MEDIATOR	Details ...	156	0.576855	2.25224	<0.0001	0.000204597	0.012	5625	tags=46%, list=18%, signal=55%
GO_NEGATIVE_REGULATION_OF_NUCLEAR_DIVISION	GO_NEGATIVE_REGULATION_OF_NUCLEAR_DIVISION	Details ...	42	0.719556	2.25127	<0.0001	0.000213745	0.012	2002	tags=43%, list=6%, signal=46%
GO_GENE_SILENCING	GO_GENE_SILENCING	Details ...	178	0.577332	2.25049	<0.0001	0.000210776	0.012	5607	tags=51%, list=18%, signal=62%
GO_CHROMATIN_ASSEMBLY_OR_DISASSEMBLY	GO_CHROMATIN_ASSEMBLY_OR_DISASSEMBLY	Details ...	148	0.630087	2.25047	<0.0001	0.000207889	0.012	5651	tags=59%, list=18%, signal=72%
GO_REGULATION_OF_CELL_CYCLE_PHASE_TRANSITION	GO_REGULATION_OF_CELL_CYCLE_PHASE_TRANSITION	Details ...	308	0.571844	2.24923	<0.0001	0.00020508	0.012	5651	tags=49%, list=18%, signal=59%
GO_SISTER_CHROMATID_COHESION	GO_SISTER_CHROMATID_COHESION	Details ...	99	0.774958	2.24815	<0.0001	0.000202345	0.012	2385	tags=59%, list=8%, signal=63%
GO_NON_RECOMBINATIONAL_REPAIR	GO_NON_RECOMBINATIONAL_REPAIR	Details ...	64	0.65732	2.24755	<0.0001	0.000199683	0.012	5517	tags=55%, list=17%, signal=66%
GO_POSTREPLICATION_REPAIR	GO_POSTREPLICATION_REPAIR	Details ...	50	0.691071	2.24696	<0.0001	0.000197089	0.012	1482	tags=38%, list=5%, signal=40%
GO_REGULATION_OF_CHROMOSOME_SEGREGATION	GO_REGULATION_OF_CHROMOSOME_SEGREGATION	Details ...	77	0.703548	2.24022	<0.0001	0.000276666	0.015	4248	tags=55%, list=13%, signal=63%
GO_CYTOSKELETON_DEPENDENT_CYTOKINESIS	GO_CYTOSKELETON_DEPENDENT_CYTOKINESIS	Details ...	39	0.768219	2.23983	<0.0001	0.000273164	0.015	2721	tags=51%, list=9%, signal=56%
GO_PROTEIN_LOCALIZATION_TO_CHROMOSOME	GO_PROTEIN_LOCALIZATION_TO_CHROMOSOME	Details ...	37	0.743685	2.23969	<0.0001	0.00026975	0.015	992	tags=46%, list=3%, signal=47%
GO_PROTEIN_DNA_COMPLEX_SUBUNIT_ORGANIZATION	GO_PROTEIN_DNA_COMPLEX_SUBUNIT_ORGANIZATION	Details ...	201	0.596242	2.23209	<0.0001	0.000371351	0.019	5651	tags=53%, list=18%, signal=64%
GO_ATP_DEPENDENT_CHROMATIN_REMODELING	GO_ATP_DEPENDENT_CHROMATIN_REMODELING	Details ...	63	0.690281	2.22985	<0.0001	0.000387844	0.02	5983	tags=62%, list=19%, signal=76%
GO_MITOTIC_CYTOKINESIS	GO_MITOTIC_CYTOKINESIS	Details ...	31	0.787543	2.22709	<0.0001	0.000427709	0.02	2661	tags=52%, list=8%, signal=56%
GO_SINGLE_STRANDED_DNA_BINDING	GO_SINGLE_STRANDED_DNA_BINDING	Details ...	81	0.646374	2.22541	<0.0001	0.000432785	0.02	5153	tags=57%, list=16%, signal=68%
GO_REPLICATION_FORK	GO_REPLICATION_FORK	Details ...	62	0.747925	2.22067	<0.0001	0.000493297	0.023	2780	tags=56%, list=9%, signal=62%
GO_DNA_DEPENDENT_ATPASE_ACTIVITY	GO_DNA_DEPENDENT_ATPASE_ACTIVITY	Details ...	77	0.728436	2.22012	<0.0001	0.000487561	0.023	5651	tags=68%, list=18%, signal=82%
GO_REGULATION_OF_CENTROSOME_DUPLICATION	GO_REGULATION_OF_CENTROSOME_DUPLICATION	Details ...	31	0.745899	2.21518	<0.0001	0.000515365	0.024	4783	tags=68%, list=15%, signal=80%
GO_RECIPROCAL_DNA_RECOMBINATION	GO_RECIPROCAL_DNA_RECOMBINATION	Details ...	34	0.67032	2.21278	<0.0001	0.000528945	0.025	3162	tags=47%, list=10%, signal=52%
GO_NEGATIVE_REGULATION_OF_MITOTIC_NUCLEAR_DIVISION	GO_NEGATIVE_REGULATION_OF_MITOTIC_NUCLEAR_DIVISION	Details ...	32	0.727417	2.21161	<0.0001	0.000532598	0.025	2002	tags=44%, list=6%, signal=47%
GO_MICROTUBULE_ORGANIZING_CENTER_ORGANIZATION	GO_MICROTUBULE_ORGANIZING_CENTER_ORGANIZATION	Details ...	80	0.630289	2.21143	<0.0001	0.00052668	0.025	4700	tags=45%, list=15%, signal=53%
GO_REGULATION_OF_DNA_REPLICATION	GO_REGULATION_OF_DNA_REPLICATION	Details ...	153	0.572121	2.2092	<0.0001	0.000531048	0.025	5121	tags=46%, list=16%, signal=54%
GO_PROTEIN_SUMOYLATION	GO_PROTEIN_SUMOYLATION	Details ...	112	0.64663	2.20635	<0.0001	0.000536351	0.026	5846	tags=58%, list=18%, signal=71%
GO_G1_DNA_DAMAGE_CHECKPOINT	GO_G1_DNA_DAMAGE_CHECKPOINT	Details ...	68	0.626229	2.20398	0.00188324	0.000568593	0.027	2311	tags=38%, list=7%, signal=41%
GO_CHROMOSOME_LOCALIZATION	GO_CHROMOSOME_LOCALIZATION	Details ...	56	0.747706	2.20282	<0.0001	0.000573446	0.028	4248	tags=64%, list=13%, signal=74%
GO_DNA_HELICASE_ACTIVITY	GO_DNA_HELICASE_ACTIVITY	Details ...	51	0.776225	2.19811	<0.0001	0.000664403	0.035	3984	tags=67%, list=13%, signal=76%
GO_DNA_SECONDARY_STRUCTURE_BINDING	GO_DNA_SECONDARY_STRUCTURE_BINDING	Details ...	24	0.765334	2.1971	<0.0001	0.000674372	0.035	2145	tags=58%, list=7%, signal=63%
GO_STRAND_DISPLACEMENT	GO_STRAND_DISPLACEMENT	Details ...	25	0.855654	2.1966	<0.0001	0.000667419	0.035	1510	tags=68%, list=5%, signal=71%
GO_REGULATION_OF_SISTER_CHROMATID_SEGREGATION	GO_REGULATION_OF_SISTER_CHROMATID_SEGREGATION	Details ...	61	0.68018	2.19627	<0.0001	0.000669324	0.035	5639	tags=59%, list=18%, signal=72%
GO_MITOTIC_SPINDLE_ASSEMBLY	GO_MITOTIC_SPINDLE_ASSEMBLY	Details ...	39	0.72525	2.18754	<0.0001	0.000782196	0.039	2661	tags=51%, list=8%, signal=56%
GO_POSITIVE_REGULATION_OF_GENE_EXPRESSION_EPIGENETIC	GO_POSITIVE_REGULATION_OF_GENE_EXPRESSION_EPIGENETIC	Details ...	71	0.626984	2.18734	<0.0001	0.000783616	0.039	6050	tags=52%, list=19%, signal=64%
GO_STRUCTURE_SPECIFIC_DNA_BINDING	GO_STRUCTURE_SPECIFIC_DNA_BINDING	Details ...	111	0.57789	2.18601	<0.0001	0.000791666	0.04	5713	tags=49%, list=18%, signal=59%
GO_CENTROSOME_CYCLE	GO_CENTROSOME_CYCLE	Details ...	44	0.723313	2.18523	<0.0001	0.000810393	0.042	4700	tags=57%, list=15%, signal=67%
GO_MEIOTIC_CHROMOSOME_SEGREGATION	GO_MEIOTIC_CHROMOSOME_SEGREGATION	Details ...	48	0.614838	2.18337	<0.0001	0.000875919	0.044	3606	tags=44%, list=11%, signal=49%
GO_CELL_DIFFERENTIATION_INVOLVED_IN_EMBRYONIC_PLACENTA_DEVELOPMENT	GO_CELL_DIFFERENTIATION_INVOLVED_IN_EMBRYONIC_PLACENTA_DEVELOPMENT	Details ...	25	0.740374	2.17514	<0.0001	0.00099268	0.051	2519	tags=52%, list=8%, signal=56%
GO_DNA_PACKAGING_COMPLEX	GO_DNA_PACKAGING_COMPLEX	Details ...	81	0.744344	2.17406	<0.0001	0.000992027	0.051	5607	tags=75%, list=18%, signal=91%
GO_NEGATIVE_REGULATION_OF_CYTOSKELETON_ORGANIZATION	GO_NEGATIVE_REGULATION_OF_CYTOSKELETON_ORGANIZATION	Details ...	206	0.537567	2.17158	<0.0001	0.00100816	0.051	2883	tags=33%, list=9%, signal=36%
GO_POSITIVE_REGULATION_OF_CELL_CYCLE	GO_POSITIVE_REGULATION_OF_CELL_CYCLE	Details ...	305	0.499549	2.1707	<0.0001	0.000998741	0.051	2517	tags=28%, list=8%, signal=30%
GO_SIGNAL_TRANSDUCTION_IN_RESPONSE_TO_DNA_DAMAGE	GO_SIGNAL_TRANSDUCTION_IN_RESPONSE_TO_DNA_DAMAGE	Details ...	91	0.59789	2.16632	<0.0001	0.00110385	0.053	5519	tags=51%, list=17%, signal=61%
GO_ENDODEOXYRIBONUCLEASE_ACTIVITY	GO_ENDODEOXYRIBONUCLEASE_ACTIVITY	Details ...	48	0.622575	2.16602	<0.0001	0.0011079	0.054	1959	tags=33%, list=6%, signal=35%
GO_TELOMERE_MAINTENANCE_VIA_RECOMBINATION	GO_TELOMERE_MAINTENANCE_VIA_RECOMBINATION	Details ...	32	0.821599	2.16487	<0.0001	0.00111543	0.054	1482	tags=66%, list=5%, signal=69%
GO_DNA_STRAND_ELONGATION	GO_DNA_STRAND_ELONGATION	Details ...	29	0.870314	2.16181	<0.0001	0.00117642	0.058	1482	tags=76%, list=5%, signal=80%
GO_CHROMOSOME_ORGANIZATION_INVOLVED_IN_MEIOTIC_CELL_CYCLE	GO_CHROMOSOME_ORGANIZATION_INVOLVED_IN_MEIOTIC_CELL_CYCLE	Details ...	39	0.641927	2.16014	<0.0001	0.00120091	0.06	5093	tags=51%, list=16%, signal=61%
GO_RIBONUCLEOPROTEIN_COMPLEX_LOCALIZATION	GO_RIBONUCLEOPROTEIN_COMPLEX_LOCALIZATION	Details ...	112	0.62439	2.15839	0.0019802	0.0012161	0.061	4859	tags=52%, list=15%, signal=61%
GO_HELICASE_ACTIVITY	GO_HELICASE_ACTIVITY	Details ...	149	0.63838	2.15709	<0.0001	0.00122614	0.063	3984	tags=44%, list=13%, signal=50%
GO_NUCLEAR_PERIPHERY	GO_NUCLEAR_PERIPHERY	Details ...	118	0.564783	2.15247	<0.0001	0.00130741	0.067	5460	tags=45%, list=17%, signal=54%
GO_REGULATION_OF_DNA_METABOLIC_PROCESS	GO_REGULATION_OF_DNA_METABOLIC_PROCESS	Details ...	320	0.507318	2.15095	<0.0001	0.00132946	0.069	3955	tags=35%, list=12%, signal=40%
GO_NEGATIVE_REGULATION_OF_ORGANELLE_ORGANIZATION	GO_NEGATIVE_REGULATION_OF_ORGANELLE_ORGANIZATION	Details ...	362	0.502769	2.15001	<0.0001	0.00132563	0.07	5121	tags=39%, list=16%, signal=46%
GO_RESPONSE_TO_IONIZING_RADIATION	GO_RESPONSE_TO_IONIZING_RADIATION	Details ...	138	0.547567	2.14946	<0.0001	0.00132804	0.072	6259	tags=46%, list=20%, signal=57%
GO_EXONUCLEASE_ACTIVITY	GO_EXONUCLEASE_ACTIVITY	Details ...	70	0.6083	2.14614	<0.0001	0.00133224	0.072	5360	tags=51%, list=17%, signal=62%
GO_DNA_STRAND_ELONGATION_INVOLVED_IN_DNA_REPLICATION	GO_DNA_STRAND_ELONGATION_INVOLVED_IN_DNA_REPLICATION	Details ...	25	0.882861	2.14394	<0.0001	0.00133269	0.072	1482	tags=76%, list=5%, signal=80%
GO_REGULATION_OF_CYCLIN_DEPENDENT_PROTEIN_KINASE_ACTIVITY	GO_REGULATION_OF_CYCLIN_DEPENDENT_PROTEIN_KINASE_ACTIVITY	Details ...	94	0.511215	2.14122	<0.0001	0.00137432	0.073	2360	tags=27%, list=7%, signal=29%
GO_NUCLEAR_CHROMATIN	GO_NUCLEAR_CHROMATIN	Details ...	271	0.497924	2.14024	<0.0001	0.00142244	0.076	6125	tags=46%, list=19%, signal=57%
GO_HISTONE_PHOSPHORYLATION	GO_HISTONE_PHOSPHORYLATION	Details ...	24	0.716015	2.13882	<0.0001	0.00143482	0.078	2316	tags=50%, list=7%, signal=54%
GO_DNA_REPLICATION_INDEPENDENT_NUCLEOSOME_ORGANIZATION	GO_DNA_REPLICATION_INDEPENDENT_NUCLEOSOME_ORGANIZATION	Details ...	44	0.739281	2.13754	<0.0001	0.00147818	0.08	3662	tags=59%, list=12%, signal=67%
GO_REGULATION_OF_DNA_DEPENDENT_DNA_REPLICATION	GO_REGULATION_OF_DNA_DEPENDENT_DNA_REPLICATION	Details ...	39	0.711116	2.13314	<0.0001	0.00152481	0.082	5616	tags=72%, list=18%, signal=87%
GO_NUCLEAR_EXPORT	GO_NUCLEAR_EXPORT	Details ...	139	0.594388	2.13138	0.00203252	0.00157035	0.085	5615	tags=51%, list=18%, signal=62%
GO_DEOXYRIBONUCLEASE_ACTIVITY	GO_DEOXYRIBONUCLEASE_ACTIVITY	Details ...	63	0.593078	2.13087	<0.0001	0.00157665	0.086	1959	tags=32%, list=6%, signal=34%
GO_NEGATIVE_REGULATION_OF_CELL_CYCLE	GO_NEGATIVE_REGULATION_OF_CELL_CYCLE	Details ...	403	0.474246	2.13059	<0.0001	0.00158248	0.087	5519	tags=38%, list=17%, signal=45%
GO_HISTONE_EXCHANGE	GO_HISTONE_EXCHANGE	Details ...	42	0.756726	2.13051	<0.0001	0.00157021	0.087	3662	tags=62%, list=12%, signal=70%
GO_NUCLEUS_ORGANIZATION	GO_NUCLEUS_ORGANIZATION	Details ...	122	0.600023	2.12953	<0.0001	0.00159111	0.087	5609	tags=52%, list=18%, signal=63%
GO_KINESIN_COMPLEX	GO_KINESIN_COMPLEX	Details ...	53	0.622538	2.12741	<0.0001	0.0016331	0.09	528	tags=28%, list=2%, signal=29%
GO_REGULATION_OF_GENE_EXPRESSION_EPIGENETIC	GO_REGULATION_OF_GENE_EXPRESSION_EPIGENETIC	Details ...	198	0.536423	2.12579	<0.0001	0.00163458	0.09	6050	tags=48%, list=19%, signal=59%
GO_NUCLEAR_ENVELOPE_ORGANIZATION	GO_NUCLEAR_ENVELOPE_ORGANIZATION	Details ...	75	0.641984	2.12388	<0.0001	0.00164897	0.09	5507	tags=53%, list=17%, signal=64%
GO_METAPHASE_PLATE_CONGRESSION	GO_METAPHASE_PLATE_CONGRESSION	Details ...	41	0.782276	2.12366	<0.0001	0.00164651	0.091	4248	tags=71%, list=13%, signal=82%
GO_FOUR_WAY_JUNCTION_DNA_BINDING	GO_FOUR_WAY_JUNCTION_DNA_BINDING	Details ...	15	0.819685	2.12342	<0.0001	0.00165352	0.092	2145	tags=67%, list=7%, signal=71%
GO_MEMBRANE_DISASSEMBLY	GO_MEMBRANE_DISASSEMBLY	Details ...	44	0.71294	2.11435	<0.0001	0.00190365	0.1	3742	tags=52%, list=12%, signal=59%
GO_RNA_LOCALIZATION	GO_RNA_LOCALIZATION	Details ...	174	0.570348	2.11417	0.002	0.00188975	0.1	4859	tags=45%, list=15%, signal=53%
GO_DNA_TEMPLATED_TRANSCRIPTION_TERMINATION	GO_DNA_TEMPLATED_TRANSCRIPTION_TERMINATION	Details ...	98	0.59876	2.1139	0.00195695	0.00187606	0.1	6113	tags=50%, list=19%, signal=62%
GO_DNA_REPLICATION_INITIATION	GO_DNA_REPLICATION_INITIATION	Details ...	29	0.847419	2.11284	<0.0001	0.00191612	0.101	4060	tags=83%, list=13%, signal=95%
GO_CENTROSOME	GO_CENTROSOME	Details ...	459	0.488949	2.11038	<0.0001	0.00199181	0.108	5377	tags=36%, list=17%, signal=42%
GO_BASE_EXCISION_REPAIR	GO_BASE_EXCISION_REPAIR	Details ...	39	0.660732	2.10933	<0.0001	0.00200318	0.11	5012	tags=51%, list=16%, signal=61%
GO_DNA_DOUBLE_STRAND_BREAK_PROCESSING	GO_DNA_DOUBLE_STRAND_BREAK_PROCESSING	Details ...	19	0.752056	2.10838	<0.0001	0.00204587	0.112	1132	tags=42%, list=4%, signal=44%
GO_CHROMOSOME_CONDENSATION	GO_CHROMOSOME_CONDENSATION	Details ...	27	0.78313	2.10778	<0.0001	0.00204358	0.112	222	tags=44%, list=1%, signal=45%
GO_DNA_REPAIR_COMPLEX	GO_DNA_REPAIR_COMPLEX	Details ...	41	0.627831	2.10769	<0.0001	0.00202939	0.112	5517	tags=59%, list=17%, signal=71%
GO_MICROTUBULE_CYTOSKELETON_ORGANIZATION	GO_MICROTUBULE_CYTOSKELETON_ORGANIZATION	Details ...	316	0.535491	2.10712	<0.0001	0.00203233	0.113	5333	tags=40%, list=17%, signal=48%
GO_PROTEIN_HETEROTETRAMERIZATION	GO_PROTEIN_HETEROTETRAMERIZATION	Details ...	32	0.719019	2.10668	<0.0001	0.00201841	0.113	6050	tags=72%, list=19%, signal=89%
GO_INTERSTRAND_CROSS_LINK_REPAIR	GO_INTERSTRAND_CROSS_LINK_REPAIR	Details ...	38	0.631813	2.10572	0.00191939	0.002067	0.115	3991	tags=45%, list=13%, signal=51%
GO_REPLISOME	GO_REPLISOME	Details ...	29	0.721189	2.1048	<0.0001	0.00205303	0.115	4552	tags=66%, list=14%, signal=76%
GO_ATP_DEPENDENT_DNA_HELICASE_ACTIVITY	GO_ATP_DEPENDENT_DNA_HELICASE_ACTIVITY	Details ...	33	0.753835	2.1018	<0.0001	0.00217192	0.122	3904	tags=64%, list=12%, signal=72%
GO_NEGATIVE_REGULATION_OF_CELL_CYCLE_G2_M_PHASE_TRANSITION	GO_NEGATIVE_REGULATION_OF_CELL_CYCLE_G2_M_PHASE_TRANSITION	Details ...	23	0.671434	2.09752	<0.0001	0.00232708	0.126	3954	tags=48%, list=12%, signal=55%
GO_NUCLEAR_MATRIX	GO_NUCLEAR_MATRIX	Details ...	95	0.553622	2.09708	<0.0001	0.00234272	0.127	5460	tags=44%, list=17%, signal=53%
GO_NUCLEOTIDE_EXCISION_REPAIR	GO_NUCLEOTIDE_EXCISION_REPAIR	Details ...	111	0.590907	2.0929	0.0020202	0.00246965	0.132	5519	tags=48%, list=17%, signal=58%
GO_CENTROMERE_COMPLEX_ASSEMBLY	GO_CENTROMERE_COMPLEX_ASSEMBLY	Details ...	39	0.768725	2.09087	<0.0001	0.00256553	0.14	3662	tags=64%, list=12%, signal=72%
GO_POSITIVE_REGULATION_OF_MITOTIC_CELL_CYCLE	GO_POSITIVE_REGULATION_OF_MITOTIC_CELL_CYCLE	Details ...	118	0.555693	2.09005	<0.0001	0.00257901	0.142	2507	tags=33%, list=8%, signal=36%
GO_REGULATION_OF_CHROMOSOME_ORGANIZATION	GO_REGULATION_OF_CHROMOSOME_ORGANIZATION	Details ...	261	0.506811	2.08993	<0.0001	0.00256833	0.142	4248	tags=34%, list=13%, signal=39%
GO_MRNA_3_END_PROCESSING	GO_MRNA_3_END_PROCESSING	Details ...	70	0.601092	2.0895	<0.0001	0.00255731	0.142	4811	tags=46%, list=15%, signal=54%
GO_MISMATCH_REPAIR	GO_MISMATCH_REPAIR	Details ...	30	0.717818	2.08881	<0.0001	0.00255081	0.143	5153	tags=63%, list=16%, signal=76%
GO_SEX_CHROMOSOME	GO_SEX_CHROMOSOME	Details ...	26	0.70481	2.08737	<0.0001	0.00259574	0.145	2890	tags=46%, list=9%, signal=51%
GO_REGULATION_OF_DOUBLE_STRAND_BREAK_REPAIR	GO_REGULATION_OF_DOUBLE_STRAND_BREAK_REPAIR	Details ...	34	0.644242	2.08474	<0.0001	0.00265324	0.149	3575	tags=50%, list=11%, signal=56%
GO_REGULATION_OF_RESPONSE_TO_DNA_DAMAGE_STIMULUS	GO_REGULATION_OF_RESPONSE_TO_DNA_DAMAGE_STIMULUS	Details ...	136	0.515407	2.08436	<0.0001	0.00264731	0.149	5423	tags=42%, list=17%, signal=50%
GO_TRANSLESION_SYNTHESIS	GO_TRANSLESION_SYNTHESIS	Details ...	38	0.638979	2.08432	0.00194553	0.00263087	0.149	1482	tags=34%, list=5%, signal=36%
GO_CHROMATIN_REMODELING	GO_CHROMATIN_REMODELING	Details ...	138	0.546395	2.08306	<0.0001	0.0026632	0.15	3662	tags=38%, list=12%, signal=42%
GO_EXONUCLEASE_ACTIVITY_ACTIVE_WITH_EITHER_RIBO_OR_DEOXYRIBONUCLEIC_ACIDS_AND_PRODUCING_5_PHOSPHOMONOESTERS	GO_EXONUCLEASE_ACTIVITY_ACTIVE_WITH_EITHER_RIBO_OR_DEOXYRIBONUCLEIC_ACIDS_AND_PRODUCING_5_PHOSPHOMONOESTERS	Details ...	40	0.651005	2.08234	<0.0001	0.0026773	0.152	5137	tags=52%, list=16%, signal=63%
GO_POSITIVE_REGULATION_OF_DNA_REPLICATION	GO_POSITIVE_REGULATION_OF_DNA_REPLICATION	Details ...	84	0.548753	2.08225	<0.0001	0.0026691	0.152	2444	tags=33%, list=8%, signal=36%
GO_POSITIVE_REGULATION_OF_CELL_CYCLE_ARREST	GO_POSITIVE_REGULATION_OF_CELL_CYCLE_ARREST	Details ...	79	0.546974	2.07723	<0.0001	0.00281449	0.159	2311	tags=32%, list=7%, signal=34%
GO_NEGATIVE_REGULATION_OF_DNA_REPLICATION	GO_NEGATIVE_REGULATION_OF_DNA_REPLICATION	Details ...	51	0.573728	2.07441	<0.0001	0.00291219	0.164	5734	tags=51%, list=18%, signal=62%
GO_MULTI_ORGANISM_LOCALIZATION	GO_MULTI_ORGANISM_LOCALIZATION	Details ...	65	0.63924	2.07279	0.00198413	0.00296631	0.166	3742	tags=45%, list=12%, signal=50%
GO_SIGNAL_TRANSDUCTION_BY_P53_CLASS_MEDIATOR	GO_SIGNAL_TRANSDUCTION_BY_P53_CLASS_MEDIATOR	Details ...	119	0.519419	2.07232	0.00191571	0.00295484	0.166	5519	tags=42%, list=17%, signal=51%
GO_REGULATION_OF_CELL_CYCLE_ARREST	GO_REGULATION_OF_CELL_CYCLE_ARREST	Details ...	100	0.51429	2.07228	<0.0001	0.00294338	0.166	2311	tags=30%, list=7%, signal=32%
GO_NEGATIVE_REGULATION_OF_CELL_CYCLE_G1_S_PHASE_TRANSITION	GO_NEGATIVE_REGULATION_OF_CELL_CYCLE_G1_S_PHASE_TRANSITION	Details ...	92	0.534605	2.07078	<0.0001	0.00300165	0.167	5651	tags=47%, list=18%, signal=57%
GO_REGULATION_OF_CELL_CYCLE_G2_M_PHASE_TRANSITION	GO_REGULATION_OF_CELL_CYCLE_G2_M_PHASE_TRANSITION	Details ...	57	0.571642	2.06829	0.0020284	0.0031224	0.172	2507	tags=35%, list=8%, signal=38%
GO_MITOTIC_G2_M_TRANSITION_CHECKPOINT	GO_MITOTIC_G2_M_TRANSITION_CHECKPOINT	Details ...	17	0.751447	2.06814	<0.0001	0.00312954	0.172	1381	tags=47%, list=4%, signal=49%
GO_NUCLEAR_REPLICATION_FORK	GO_NUCLEAR_REPLICATION_FORK	Details ...	39	0.715598	2.06749	<0.0001	0.00314239	0.174	5552	tags=69%, list=17%, signal=84%
GO_REGULATION_OF_CELL_CYCLE_G1_S_PHASE_TRANSITION	GO_REGULATION_OF_CELL_CYCLE_G1_S_PHASE_TRANSITION	Details ...	140	0.51748	2.0665	<0.0001	0.00317247	0.174	3422	tags=35%, list=11%, signal=39%
GO_POSITIVE_REGULATION_OF_TELOMERE_MAINTENANCE	GO_POSITIVE_REGULATION_OF_TELOMERE_MAINTENANCE	Details ...	44	0.640233	2.06562	<0.0001	0.00316299	0.174	4146	tags=45%, list=13%, signal=52%
GO_NEGATIVE_REGULATION_OF_CHROMOSOME_SEGREGATION	GO_NEGATIVE_REGULATION_OF_CHROMOSOME_SEGREGATION	Details ...	25	0.730519	2.06414	<0.0001	0.00320074	0.177	1899	tags=44%, list=6%, signal=47%
GO_INO80_TYPE_COMPLEX	GO_INO80_TYPE_COMPLEX	Details ...	21	0.70696	2.06361	<0.0001	0.00318788	0.177	1960	tags=38%, list=6%, signal=41%
GO_REGULATION_OF_PROTEASOMAL_UBIQUITIN_DEPENDENT_PROTEIN_CATABOLIC_PROCESS	GO_REGULATION_OF_PROTEASOMAL_UBIQUITIN_DEPENDENT_PROTEIN_CATABOLIC_PROCESS	Details ...	142	0.54219	2.06292	<0.0001	0.0032176	0.18	5639	tags=47%, list=18%, signal=57%
GO_3_5_EXONUCLEASE_ACTIVITY	GO_3_5_EXONUCLEASE_ACTIVITY	Details ...	44	0.621933	2.062	<0.0001	0.00322465	0.18	5170	tags=55%, list=16%, signal=65%
GO_REGULATION_OF_PROTEASOMAL_PROTEIN_CATABOLIC_PROCESS	GO_REGULATION_OF_PROTEASOMAL_PROTEIN_CATABOLIC_PROCESS	Details ...	175	0.526113	2.0611	<0.0001	0.00325591	0.183	5639	tags=45%, list=18%, signal=55%
GO_POSITIVE_REGULATION_OF_CYTOKINESIS	GO_POSITIVE_REGULATION_OF_CYTOKINESIS	Details ...	26	0.72993	2.06079	<0.0001	0.00325907	0.183	2371	tags=46%, list=7%, signal=50%
GO_REGULATION_OF_TRANSCRIPTION_INVOLVED_IN_G1_S_TRANSITION_OF_MITOTIC_CELL_CYCLE	GO_REGULATION_OF_TRANSCRIPTION_INVOLVED_IN_G1_S_TRANSITION_OF_MITOTIC_CELL_CYCLE	Details ...	26	0.766857	2.05982	<0.0001	0.00331	0.187	2823	tags=62%, list=9%, signal=67%
GO_NEGATIVE_REGULATION_OF_CHROMOSOME_ORGANIZATION	GO_NEGATIVE_REGULATION_OF_CHROMOSOME_ORGANIZATION	Details ...	93	0.570509	2.05867	0.0019685	0.00335927	0.191	5852	tags=46%, list=18%, signal=57%
GO_APICAL_JUNCTION_ASSEMBLY	GO_APICAL_JUNCTION_ASSEMBLY	Details ...	38	0.646276	2.05453	<0.0001	0.00356053	0.203	4556	tags=58%, list=14%, signal=68%
GO_MICROTUBULE_ORGANIZING_CENTER_PART	GO_MICROTUBULE_ORGANIZING_CENTER_PART	Details ...	135	0.505699	2.0521	<0.0001	0.00360044	0.207	4700	tags=34%, list=15%, signal=40%
GO_HETEROCHROMATIN	GO_HETEROCHROMATIN	Details ...	65	0.578363	2.05206	<0.0001	0.00358109	0.207	2890	tags=38%, list=9%, signal=42%
GO_POSITIVE_REGULATION_OF_DNA_REPAIR	GO_POSITIVE_REGULATION_OF_DNA_REPAIR	Details ...	34	0.629658	2.05139	<0.0001	0.00359924	0.207	2508	tags=38%, list=8%, signal=41%
GO_RESPONSE_TO_UV	GO_RESPONSE_TO_UV	Details ...	121	0.50931	2.05089	<0.0001	0.00361169	0.21	5552	tags=43%, list=17%, signal=52%
GO_CENTRIOLE	GO_CENTRIOLE	Details ...	93	0.531041	2.05065	<0.0001	0.00362787	0.212	4700	tags=37%, list=15%, signal=43%
GO_NUCLEOBASE_CONTAINING_COMPOUND_TRANSPORT	GO_NUCLEOBASE_CONTAINING_COMPOUND_TRANSPORT	Details ...	188	0.519612	2.05028	0.0019802	0.00361758	0.212	4859	tags=39%, list=15%, signal=46%
GO_SPINDLE_CHECKPOINT	GO_SPINDLE_CHECKPOINT	Details ...	23	0.75607	2.04991	<0.0001	0.00361051	0.212	1899	tags=48%, list=6%, signal=51%
GO_REGULATION_OF_LIGASE_ACTIVITY	GO_REGULATION_OF_LIGASE_ACTIVITY	Details ...	125	0.605725	2.04671	<0.0001	0.00376392	0.216	3170	tags=39%, list=10%, signal=43%
GO_CENTROSOME_DUPLICATION	GO_CENTROSOME_DUPLICATION	Details ...	31	0.700021	2.04528	<0.0001	0.00382243	0.219	4700	tags=52%, list=15%, signal=61%
GO_DNA_POLYMERASE_ACTIVITY	GO_DNA_POLYMERASE_ACTIVITY	Details ...	33	0.637207	2.04167	0.00194553	0.0039911	0.225	5275	tags=55%, list=17%, signal=65%
GO_CELL_DIVISION_SITE	GO_CELL_DIVISION_SITE	Details ...	47	0.608156	2.03816	<0.0001	0.00411205	0.231	5049	tags=45%, list=16%, signal=53%
GO_NUCLEAR_PORE	GO_NUCLEAR_PORE	Details ...	74	0.645598	2.03438	0.00403226	0.00431474	0.239	5735	tags=57%, list=18%, signal=69%
GO_NEGATIVE_REGULATION_OF_GENE_EXPRESSION_EPIGENETIC	GO_NEGATIVE_REGULATION_OF_GENE_EXPRESSION_EPIGENETIC	Details ...	90	0.570102	2.03431	<0.0001	0.00429284	0.239	6050	tags=58%, list=19%, signal=71%
GO_OOCYTE_MATURATION	GO_OOCYTE_MATURATION	Details ...	18	0.688699	2.03311	0.00187617	0.00435171	0.242	1992	tags=44%, list=6%, signal=47%
GO_DNA_DIRECTED_DNA_POLYMERASE_ACTIVITY	GO_DNA_DIRECTED_DNA_POLYMERASE_ACTIVITY	Details ...	26	0.646717	2.033	<0.0001	0.00433384	0.242	5275	tags=54%, list=17%, signal=65%
GO_NEGATIVE_REGULATION_OF_CELLULAR_PROTEIN_CATABOLIC_PROCESS	GO_NEGATIVE_REGULATION_OF_CELLULAR_PROTEIN_CATABOLIC_PROCESS	Details ...	60	0.582126	2.02891	<0.0001	0.00456153	0.254	3095	tags=33%, list=10%, signal=37%
GO_POSITIVE_REGULATION_OF_DNA_BIOSYNTHETIC_PROCESS	GO_POSITIVE_REGULATION_OF_DNA_BIOSYNTHETIC_PROCESS	Details ...	57	0.582128	2.0288	0.00196464	0.00453884	0.254	2377	tags=35%, list=7%, signal=38%
GO_PURINE_NTP_DEPENDENT_HELICASE_ACTIVITY	GO_PURINE_NTP_DEPENDENT_HELICASE_ACTIVITY	Details ...	96	0.597706	2.02867	<0.0001	0.00452512	0.255	5160	tags=46%, list=16%, signal=55%
GO_REGULATION_OF_RETINOIC_ACID_RECEPTOR_SIGNALING_PATHWAY	GO_REGULATION_OF_RETINOIC_ACID_RECEPTOR_SIGNALING_PATHWAY	Details ...	16	0.687969	2.0286	<0.0001	0.00450775	0.256	2730	tags=44%, list=9%, signal=48%
GO_FEMALE_MEIOTIC_DIVISION	GO_FEMALE_MEIOTIC_DIVISION	Details ...	24	0.689492	2.0275	0.0018622	0.00455663	0.258	3051	tags=50%, list=10%, signal=55%
GO_CYCLIN_DEPENDENT_PROTEIN_KINASE_ACTIVITY	GO_CYCLIN_DEPENDENT_PROTEIN_KINASE_ACTIVITY	Details ...	34	0.600704	2.02451	<0.0001	0.00474116	0.267	2048	tags=29%, list=6%, signal=31%
GO_REGULATION_OF_TELOMERE_MAINTENANCE_VIA_TELOMERE_LENGTHENING	GO_REGULATION_OF_TELOMERE_MAINTENANCE_VIA_TELOMERE_LENGTHENING	Details ...	49	0.621142	2.02099	0.00196078	0.00495469	0.279	5121	tags=49%, list=16%, signal=58%
GO_POSITIVE_REGULATION_OF_MITOTIC_NUCLEAR_DIVISION	GO_POSITIVE_REGULATION_OF_MITOTIC_NUCLEAR_DIVISION	Details ...	46	0.601498	2.02038	0.00192678	0.0049477	0.279	2507	tags=35%, list=8%, signal=38%
GO_SOMATIC_DIVERSIFICATION_OF_IMMUNOGLOBULINS	GO_SOMATIC_DIVERSIFICATION_OF_IMMUNOGLOBULINS	Details ...	28	0.675408	2.01981	0.00188324	0.00496045	0.279	5093	tags=57%, list=16%, signal=68%
GO_CELLULAR_RESPONSE_TO_RADIATION	GO_CELLULAR_RESPONSE_TO_RADIATION	Details ...	129	0.494162	2.01783	<0.0001	0.00506297	0.284	6259	tags=43%, list=20%, signal=54%
GO_BLASTOCYST_DEVELOPMENT	GO_BLASTOCYST_DEVELOPMENT	Details ...	58	0.572574	2.01579	<0.0001	0.00514794	0.289	5473	tags=47%, list=17%, signal=56%
GO_NUCLEAR_TRANSPORT	GO_NUCLEAR_TRANSPORT	Details ...	342	0.470347	2.01557	0.00391389	0.00514305	0.29	6210	tags=42%, list=20%, signal=52%
GO_HISTONE_KINASE_ACTIVITY	GO_HISTONE_KINASE_ACTIVITY	Details ...	18	0.757972	2.01341	0.0039604	0.00526745	0.295	2316	tags=56%, list=7%, signal=60%
GO_POSITIVE_REGULATION_OF_PROTEIN_MODIFICATION_BY_SMALL_PROTEIN_CONJUGATION_OR_REMOVAL	GO_POSITIVE_REGULATION_OF_PROTEIN_MODIFICATION_BY_SMALL_PROTEIN_CONJUGATION_OR_REMOVAL	Details ...	185	0.532972	2.01222	0.00191571	0.00529488	0.297	3743	tags=38%, list=12%, signal=43%
GO_REGULATION_OF_CELLULAR_PROTEIN_CATABOLIC_PROCESS	GO_REGULATION_OF_CELLULAR_PROTEIN_CATABOLIC_PROCESS	Details ...	264	0.51432	2.00926	0.00196464	0.00550095	0.308	5710	tags=45%, list=18%, signal=54%
GO_POSITIVE_REGULATION_OF_CELL_CYCLE_PHASE_TRANSITION	GO_POSITIVE_REGULATION_OF_CELL_CYCLE_PHASE_TRANSITION	Details ...	66	0.585412	2.00925	<0.0001	0.00547536	0.308	5639	tags=52%, list=18%, signal=62%
GO_POSITIVE_REGULATION_OF_CHROMOSOME_SEGREGATION	GO_POSITIVE_REGULATION_OF_CHROMOSOME_SEGREGATION	Details ...	23	0.72938	2.00468	<0.0001	0.00577804	0.318	5639	tags=74%, list=18%, signal=90%
GO_POSITIVE_REGULATION_OF_TELOMERE_MAINTENANCE_VIA_TELOMERE_LENGTHENING	GO_POSITIVE_REGULATION_OF_TELOMERE_MAINTENANCE_VIA_TELOMERE_LENGTHENING	Details ...	32	0.669252	2.00375	<0.0001	0.00583539	0.321	4146	tags=50%, list=13%, signal=57%
GO_PRONUCLEUS	GO_PRONUCLEUS	Details ...	15	0.818629	2.00209	<0.0001	0.00597092	0.326	2182	tags=67%, list=7%, signal=72%
GO_NUCLEAR_IMPORT	GO_NUCLEAR_IMPORT	Details ...	126	0.505707	1.99954	0.00196464	0.00608852	0.331	6303	tags=45%, list=20%, signal=56%
GO_NUCLEOCYTOPLASMIC_TRANSPORTER_ACTIVITY	GO_NUCLEOCYTOPLASMIC_TRANSPORTER_ACTIVITY	Details ...	23	0.748342	1.99845	0.00199203	0.00617369	0.334	3742	tags=61%, list=12%, signal=69%
GO_ATPASE_ACTIVITY	GO_ATPASE_ACTIVITY	Details ...	418	0.470548	1.99774	<0.0001	0.00622156	0.336	5774	tags=39%, list=18%, signal=46%
GO_RIBONUCLEOPROTEIN_COMPLEX_BINDING	GO_RIBONUCLEOPROTEIN_COMPLEX_BINDING	Details ...	89	0.590788	1.99772	0.00603622	0.00619353	0.336	4578	tags=48%, list=14%, signal=56%
GO_CELL_AGING	GO_CELL_AGING	Details ...	65	0.523465	1.99685	<0.0001	0.00625313	0.342	2581	tags=34%, list=8%, signal=37%
GO_REGULATION_OF_GENE_SILENCING	GO_REGULATION_OF_GENE_SILENCING	Details ...	48	0.611134	1.99373	<0.0001	0.00656384	0.349	4187	tags=46%, list=13%, signal=53%
GO_RNA_3_END_PROCESSING	GO_RNA_3_END_PROCESSING	Details ...	94	0.561277	1.99267	<0.0001	0.00665622	0.352	5384	tags=45%, list=17%, signal=54%
GO_MICROTUBULE_BASED_PROCESS	GO_MICROTUBULE_BASED_PROCESS	Details ...	480	0.475235	1.99092	<0.0001	0.00677914	0.361	5333	tags=35%, list=17%, signal=41%
GO_MICROTUBULE_POLYMERIZATION_OR_DEPOLYMERIZATION	GO_MICROTUBULE_POLYMERIZATION_OR_DEPOLYMERIZATION	Details ...	38	0.618146	1.98917	<0.0001	0.00690998	0.364	2298	tags=34%, list=7%, signal=37%
GO_CELLULAR_RESPONSE_TO_IONIZING_RADIATION	GO_CELLULAR_RESPONSE_TO_IONIZING_RADIATION	Details ...	50	0.597765	1.98853	<0.0001	0.00692259	0.366	3954	tags=40%, list=12%, signal=46%
GO_POSITIVE_REGULATION_OF_CELLULAR_PROTEIN_CATABOLIC_PROCESS	GO_POSITIVE_REGULATION_OF_CELLULAR_PROTEIN_CATABOLIC_PROCESS	Details ...	186	0.524265	1.9858	0.00191571	0.00721082	0.375	6522	tags=52%, list=21%, signal=65%
GO_CENTRIOLE_ASSEMBLY	GO_CENTRIOLE_ASSEMBLY	Details ...	18	0.761666	1.98527	<0.0001	0.00724542	0.378	5205	tags=61%, list=16%, signal=73%
GO_SOMATIC_DIVERSIFICATION_OF_IMMUNE_RECEPTORS	GO_SOMATIC_DIVERSIFICATION_OF_IMMUNE_RECEPTORS	Details ...	39	0.633966	1.98485	0.0019084	0.00726978	0.381	5131	tags=54%, list=16%, signal=64%
GO_POSITIVE_REGULATION_OF_CHROMOSOME_ORGANIZATION	GO_POSITIVE_REGULATION_OF_CHROMOSOME_ORGANIZATION	Details ...	139	0.495302	1.98455	<0.0001	0.00729376	0.381	4248	tags=35%, list=13%, signal=41%
GO_MICROTUBULE_MOTOR_ACTIVITY	GO_MICROTUBULE_MOTOR_ACTIVITY	Details ...	75	0.521538	1.98422	<0.0001	0.00730455	0.382	3660	tags=32%, list=12%, signal=36%
GO_DNA_DAMAGE_RESPONSE_DETECTION_OF_DNA_DAMAGE	GO_DNA_DAMAGE_RESPONSE_DETECTION_OF_DNA_DAMAGE	Details ...	36	0.70966	1.9836	0.00200401	0.00733366	0.386	2356	tags=47%, list=7%, signal=51%
GO_CELLULAR_PROTEIN_COMPLEX_LOCALIZATION	GO_CELLULAR_PROTEIN_COMPLEX_LOCALIZATION	Details ...	22	0.645478	1.98339	<0.0001	0.00731517	0.386	3938	tags=55%, list=12%, signal=62%
GO_MORPHOGENESIS_OF_A_POLARIZED_EPITHELIUM	GO_MORPHOGENESIS_OF_A_POLARIZED_EPITHELIUM	Details ...	27	0.663208	1.98316	0.00397614	0.00730864	0.387	3938	tags=52%, list=12%, signal=59%
GO_POSITIVE_REGULATION_OF_LIGASE_ACTIVITY	GO_POSITIVE_REGULATION_OF_LIGASE_ACTIVITY	Details ...	105	0.618658	1.98236	0.00579151	0.0073146	0.389	6460	tags=55%, list=20%, signal=69%
GO_CHROMATIN_SILENCING	GO_CHROMATIN_SILENCING	Details ...	73	0.582734	1.98175	0.00186916	0.00733425	0.39	6050	tags=56%, list=19%, signal=69%
GO_REGULATION_OF_PROTEIN_MODIFICATION_BY_SMALL_PROTEIN_CONJUGATION_OR_REMOVAL	GO_REGULATION_OF_PROTEIN_MODIFICATION_BY_SMALL_PROTEIN_CONJUGATION_OR_REMOVAL	Details ...	266	0.497691	1.98171	0.00193798	0.00730678	0.39	5814	tags=43%, list=18%, signal=52%
GO_REGULATION_OF_TELOMERE_MAINTENANCE	GO_REGULATION_OF_TELOMERE_MAINTENANCE	Details ...	64	0.581635	1.97345	0.00588235	0.00807788	0.408	5121	tags=45%, list=16%, signal=54%
GO_NUCLEIC_ACID_PHOSPHODIESTER_BOND_HYDROLYSIS	GO_NUCLEIC_ACID_PHOSPHODIESTER_BOND_HYDROLYSIS	Details ...	230	0.487074	1.97145	0.00200401	0.00826159	0.411	5552	tags=41%, list=17%, signal=49%
GO_DNA_REPLICATION_DEPENDENT_NUCLEOSOME_ORGANIZATION	GO_DNA_REPLICATION_DEPENDENT_NUCLEOSOME_ORGANIZATION	Details ...	27	0.735469	1.96997	0.00376648	0.00840163	0.418	6050	tags=78%, list=19%, signal=96%
GO_REGULATION_OF_CYTOSKELETON_ORGANIZATION	GO_REGULATION_OF_CYTOSKELETON_ORGANIZATION	Details ...	475	0.451878	1.96891	<0.0001	0.00846235	0.419	5102	tags=35%, list=16%, signal=42%
GO_TERMINATION_OF_RNA_POLYMERASE_II_TRANSCRIPTION	GO_TERMINATION_OF_RNA_POLYMERASE_II_TRANSCRIPTION	Details ...	61	0.597092	1.96786	0.00201207	0.00855326	0.424	5384	tags=48%, list=17%, signal=57%
GO_PROTEASOMAL_PROTEIN_CATABOLIC_PROCESS	GO_PROTEASOMAL_PROTEIN_CATABOLIC_PROCESS	Details ...	265	0.519618	1.96517	0.00189394	0.00876028	0.432	5532	tags=42%, list=17%, signal=50%
GO_REGULATION_OF_RNA_STABILITY	GO_REGULATION_OF_RNA_STABILITY	Details ...	134	0.551261	1.96493	0.00391389	0.00875098	0.435	5532	tags=48%, list=17%, signal=58%
GO_RNA_POLYADENYLATION	GO_RNA_POLYADENYLATION	Details ...	28	0.644983	1.96257	<0.0001	0.00898801	0.444	6745	tags=61%, list=21%, signal=77%
GO_TRANSFERASE_COMPLEX_TRANSFERRING_PHOSPHORUS_CONTAINING_GROUPS	GO_TRANSFERASE_COMPLEX_TRANSFERRING_PHOSPHORUS_CONTAINING_GROUPS	Details ...	230	0.468328	1.95955	0.00194553	0.00925702	0.456	5698	tags=37%, list=18%, signal=45%
GO_PEPTIDYL_LYSINE_MODIFICATION	GO_PEPTIDYL_LYSINE_MODIFICATION	Details ...	278	0.485198	1.95877	0.00199203	0.0092933	0.458	5849	tags=41%, list=18%, signal=50%
GO_DESMOSOME	GO_DESMOSOME	Details ...	26	0.698714	1.95752	<0.0001	0.00944337	0.467	5398	tags=81%, list=17%, signal=97%
GO_NEGATIVE_REGULATION_OF_PROTEIN_MODIFICATION_BY_SMALL_PROTEIN_CONJUGATION_OR_REMOVAL	GO_NEGATIVE_REGULATION_OF_PROTEIN_MODIFICATION_BY_SMALL_PROTEIN_CONJUGATION_OR_REMOVAL	Details ...	133	0.587358	1.95723	0.00198413	0.00944283	0.467	5740	tags=51%, list=18%, signal=62%
GO_CHROMATIN_SILENCING_AT_RDNA	GO_CHROMATIN_SILENCING_AT_RDNA	Details ...	31	0.6838	1.95189	0.00579151	0.0101013	0.493	6050	tags=68%, list=19%, signal=84%
GO_CELLULAR_RESPONSE_TO_UV	GO_CELLULAR_RESPONSE_TO_UV	Details ...	65	0.524203	1.95161	<0.0001	0.010114	0.493	3384	tags=35%, list=11%, signal=40%
GO_REGULATION_OF_SPINDLE_ORGANIZATION	GO_REGULATION_OF_SPINDLE_ORGANIZATION	Details ...	19	0.764508	1.95101	<0.0001	0.0101357	0.494	4201	tags=74%, list=13%, signal=85%
GO_TELOMERIC_DNA_BINDING	GO_TELOMERIC_DNA_BINDING	Details ...	28	0.614373	1.94891	<0.0001	0.0103798	0.5	3955	tags=46%, list=12%, signal=53%
GO_HISTONE_BINDING	GO_HISTONE_BINDING	Details ...	160	0.509392	1.94859	<0.0001	0.0103766	0.5	6165	tags=48%, list=19%, signal=59%
GO_INTRAMOLECULAR_TRANSFERASE_ACTIVITY	GO_INTRAMOLECULAR_TRANSFERASE_ACTIVITY	Details ...	26	0.644315	1.94822	<0.0001	0.0103709	0.5	1799	tags=35%, list=6%, signal=37%
GO_NUCLEOTIDYLTRANSFERASE_ACTIVITY	GO_NUCLEOTIDYLTRANSFERASE_ACTIVITY	Details ...	121	0.51785	1.94576	0.00391389	0.0106644	0.511	5332	tags=40%, list=17%, signal=47%
GO_POSITIVE_REGULATION_OF_RESPONSE_TO_DNA_DAMAGE_STIMULUS	GO_POSITIVE_REGULATION_OF_RESPONSE_TO_DNA_DAMAGE_STIMULUS	Details ...	59	0.522768	1.9454	<0.0001	0.0106712	0.513	2508	tags=29%, list=8%, signal=31%
GO_NUCLEOTIDE_EXCISION_REPAIR_DNA_GAP_FILLING	GO_NUCLEOTIDE_EXCISION_REPAIR_DNA_GAP_FILLING	Details ...	24	0.686741	1.94451	0.00194932	0.0107307	0.514	5519	tags=63%, list=17%, signal=76%
GO_REGULATION_OF_TRANSLATION_IN_RESPONSE_TO_STRESS	GO_REGULATION_OF_TRANSLATION_IN_RESPONSE_TO_STRESS	Details ...	19	0.69387	1.94446	0.00393701	0.010696	0.514	6380	tags=63%, list=20%, signal=79%
GO_PROTEIN_UBIQUITINATION_INVOLVED_IN_UBIQUITIN_DEPENDENT_PROTEIN_CATABOLIC_PROCESS	GO_PROTEIN_UBIQUITINATION_INVOLVED_IN_UBIQUITIN_DEPENDENT_PROTEIN_CATABOLIC_PROCESS	Details ...	129	0.540392	1.94432	<0.0001	0.01067	0.514	5657	tags=43%, list=18%, signal=53%
GO_SITE_OF_DOUBLE_STRAND_BREAK	GO_SITE_OF_DOUBLE_STRAND_BREAK	Details ...	28	0.632164	1.9435	<0.0001	0.0107204	0.515	4514	tags=54%, list=14%, signal=62%
GO_DNA_TEMPLATED_TRANSCRIPTION_ELONGATION	GO_DNA_TEMPLATED_TRANSCRIPTION_ELONGATION	Details ...	88	0.552861	1.94266	0.00204918	0.0108035	0.519	4203	tags=36%, list=13%, signal=42%
GO_REGULATION_OF_UBIQUITIN_PROTEIN_LIGASE_ACTIVITY	GO_REGULATION_OF_UBIQUITIN_PROTEIN_LIGASE_ACTIVITY	Details ...	17	0.673322	1.94217	0.00195695	0.0108209	0.522	1992	tags=41%, list=6%, signal=44%
GO_RESPONSE_TO_X_RAY	GO_RESPONSE_TO_X_RAY	Details ...	30	0.651453	1.93749	0.00578035	0.0115393	0.542	3904	tags=50%, list=12%, signal=57%
GO_POSITIVE_REGULATION_OF_CELL_DIVISION	GO_POSITIVE_REGULATION_OF_CELL_DIVISION	Details ...	113	0.499914	1.93381	<0.0001	0.011934	0.55	5408	tags=40%, list=17%, signal=48%
GO_CYCLIN_DEPENDENT_PROTEIN_KINASE_HOLOENZYME_COMPLEX	GO_CYCLIN_DEPENDENT_PROTEIN_KINASE_HOLOENZYME_COMPLEX	Details ...	30	0.60165	1.93365	0.00579151	0.011919	0.551	5628	tags=50%, list=18%, signal=61%
GO_EPIDERMIS_DEVELOPMENT	GO_EPIDERMIS_DEVELOPMENT	Details ...	224	0.475828	1.93244	<0.0001	0.0120436	0.552	6979	tags=50%, list=22%, signal=64%
GO_RESPONSE_TO_GAMMA_RADIATION	GO_RESPONSE_TO_GAMMA_RADIATION	Details ...	49	0.555569	1.93214	<0.0001	0.0120778	0.555	5121	tags=47%, list=16%, signal=56%
GO_HISTONE_METHYLTRANSFERASE_COMPLEX	GO_HISTONE_METHYLTRANSFERASE_COMPLEX	Details ...	63	0.535245	1.93065	0.00198413	0.0122902	0.558	6164	tags=49%, list=19%, signal=61%
GO_TRNA_TRANSPORT	GO_TRNA_TRANSPORT	Details ...	32	0.740358	1.92961	<0.0001	0.0123786	0.559	3742	tags=59%, list=12%, signal=67%
GO_REGULATION_OF_CELLULAR_SENESCENCE	GO_REGULATION_OF_CELLULAR_SENESCENCE	Details ...	26	0.633432	1.9286	0.00409836	0.0124956	0.561	3643	tags=46%, list=11%, signal=52%
GO_MICROTUBULE	GO_MICROTUBULE	Details ...	381	0.437987	1.92794	<0.0001	0.0125217	0.565	5333	tags=33%, list=17%, signal=39%
GO_ESTABLISHMENT_OF_TISSUE_POLARITY	GO_ESTABLISHMENT_OF_TISSUE_POLARITY	Details ...	17	0.702287	1.92772	0.00396825	0.012507	0.566	3913	tags=53%, list=12%, signal=60%
GO_HISTONE_MRNA_METABOLIC_PROCESS	GO_HISTONE_MRNA_METABOLIC_PROCESS	Details ...	28	0.64389	1.92734	0.00189394	0.0125533	0.568	4868	tags=54%, list=15%, signal=63%
GO_RETROGRADE_VESICLE_MEDIATED_TRANSPORT_GOLGI_TO_ER	GO_RETROGRADE_VESICLE_MEDIATED_TRANSPORT_GOLGI_TO_ER	Details ...	75	0.588435	1.92464	0.00984252	0.0129649	0.578	5879	tags=49%, list=19%, signal=60%
GO_NUCLEASE_ACTIVITY	GO_NUCLEASE_ACTIVITY	Details ...	185	0.462425	1.92452	0.00402414	0.0129425	0.578	5360	tags=37%, list=17%, signal=44%
GO_REGULATION_OF_DNA_TEMPLATED_TRANSCRIPTION_INITIATION	GO_REGULATION_OF_DNA_TEMPLATED_TRANSCRIPTION_INITIATION	Details ...	31	0.583742	1.92378	0.00575816	0.0130043	0.58	5392	tags=52%, list=17%, signal=62%
GO_NCRNA_TRANSCRIPTION	GO_NCRNA_TRANSCRIPTION	Details ...	81	0.52045	1.9234	0.00199601	0.0129903	0.581	7513	tags=46%, list=24%, signal=60%
GO_HOMOLOGOUS_CHROMOSOME_SEGREGATION	GO_HOMOLOGOUS_CHROMOSOME_SEGREGATION	Details ...	37	0.567634	1.92309	0.00208333	0.01299	0.582	5093	tags=46%, list=16%, signal=55%
GO_TELOMERE_MAINTENANCE_VIA_TELOMERE_LENGTHENING	GO_TELOMERE_MAINTENANCE_VIA_TELOMERE_LENGTHENING	Details ...	24	0.63563	1.9196	0.00204499	0.0136138	0.593	2932	tags=42%, list=9%, signal=46%
GO_NUCLEOSOME_BINDING	GO_NUCLEOSOME_BINDING	Details ...	44	0.574952	1.917	<0.0001	0.0140225	0.603	5983	tags=50%, list=19%, signal=62%
GO_METHYLTRANSFERASE_COMPLEX	GO_METHYLTRANSFERASE_COMPLEX	Details ...	82	0.537343	1.91589	0.00199203	0.0142235	0.61	6164	tags=49%, list=19%, signal=60%
GO_ANAPHASE_PROMOTING_COMPLEX	GO_ANAPHASE_PROMOTING_COMPLEX	Details ...	20	0.703378	1.91196	0.00199601	0.0148302	0.624	457	tags=30%, list=1%, signal=30%
GO_BLASTOCYST_GROWTH	GO_BLASTOCYST_GROWTH	Details ...	15	0.779753	1.91164	<0.0001	0.0148236	0.625	4364	tags=67%, list=14%, signal=77%
GO_CHROMOSOME_SEPARATION	GO_CHROMOSOME_SEPARATION	Details ...	16	0.70392	1.91018	0.00380952	0.0150911	0.634	3860	tags=50%, list=12%, signal=57%
GO_CHROMATIN_DNA_BINDING	GO_CHROMATIN_DNA_BINDING	Details ...	73	0.531331	1.90846	0.00194553	0.0153772	0.638	7063	tags=52%, list=22%, signal=67%
GO_TRANSCRIPTION_ELONGATION_FROM_RNA_POLYMERASE_II_PROMOTER	GO_TRANSCRIPTION_ELONGATION_FROM_RNA_POLYMERASE_II_PROMOTER	Details ...	73	0.553182	1.90836	0.00402414	0.0153535	0.639	3515	tags=34%, list=11%, signal=38%
GO_NUCLEAR_HETEROCHROMATIN	GO_NUCLEAR_HETEROCHROMATIN	Details ...	31	0.613587	1.90812	0.00198807	0.0153292	0.639	2507	tags=39%, list=8%, signal=42%
GO_POSITIVE_REGULATION_OF_NUCLEAR_DIVISION	GO_POSITIVE_REGULATION_OF_NUCLEAR_DIVISION	Details ...	56	0.530234	1.90705	0.0038835	0.0154446	0.642	5639	tags=43%, list=18%, signal=52%
GO_REGULATION_OF_MEMBRANE_PERMEABILITY	GO_REGULATION_OF_MEMBRANE_PERMEABILITY	Details ...	69	0.533472	1.90305	0.00578035	0.0161683	0.654	5841	tags=46%, list=18%, signal=57%
GO_POLY_PURINE_TRACT_BINDING	GO_POLY_PURINE_TRACT_BINDING	Details ...	18	0.675437	1.90206	0.00392157	0.0162713	0.657	2923	tags=56%, list=9%, signal=61%
GO_REGULATION_OF_PROTEIN_INSERTION_INTO_MITOCHONDRIAL_MEMBRANE_INVOLVED_IN_APOPTOTIC_SIGNALING_PATHWAY	GO_REGULATION_OF_PROTEIN_INSERTION_INTO_MITOCHONDRIAL_MEMBRANE_INVOLVED_IN_APOPTOTIC_SIGNALING_PATHWAY	Details ...	29	0.627358	1.90077	0.00378788	0.0164384	0.659	5841	tags=62%, list=18%, signal=76%
GO_KERATINOCYTE_DIFFERENTIATION	GO_KERATINOCYTE_DIFFERENTIATION	Details ...	78	0.568733	1.89938	<0.0001	0.0166646	0.663	6963	tags=58%, list=22%, signal=74%
GO_ESTABLISHMENT_OF_MITOTIC_SPINDLE_LOCALIZATION	GO_ESTABLISHMENT_OF_MITOTIC_SPINDLE_LOCALIZATION	Details ...	23	0.66102	1.8982	0.00190476	0.0167932	0.664	1364	tags=39%, list=4%, signal=41%
GO_NUCLEAR_UBIQUITIN_LIGASE_COMPLEX	GO_NUCLEAR_UBIQUITIN_LIGASE_COMPLEX	Details ...	40	0.571052	1.89815	0.00199203	0.016753	0.664	635	tags=23%, list=2%, signal=23%
GO_ANAPHASE_PROMOTING_COMPLEX_DEPENDENT_CATABOLIC_PROCESS	GO_ANAPHASE_PROMOTING_COMPLEX_DEPENDENT_CATABOLIC_PROCESS	Details ...	75	0.715928	1.8968	0.0059761	0.0169685	0.667	3170	tags=52%, list=10%, signal=58%
GO_SYNAPTONEMAL_COMPLEX	GO_SYNAPTONEMAL_COMPLEX	Details ...	31	0.571592	1.89347	0.00195695	0.0175394	0.671	5153	tags=45%, list=16%, signal=54%
GO_BICELLULAR_TIGHT_JUNCTION_ASSEMBLY	GO_BICELLULAR_TIGHT_JUNCTION_ASSEMBLY	Details ...	30	0.605357	1.89203	0.00192678	0.0177187	0.674	4435	tags=53%, list=14%, signal=62%
GO_EMBRYONIC_PLACENTA_DEVELOPMENT	GO_EMBRYONIC_PLACENTA_DEVELOPMENT	Details ...	82	0.49254	1.88976	0.00195312	0.0181383	0.687	5197	tags=38%, list=16%, signal=45%
GO_REGULATION_OF_PROTEIN_UBIQUITINATION_INVOLVED_IN_UBIQUITIN_DEPENDENT_PROTEIN_CATABOLIC_PROCESS	GO_REGULATION_OF_PROTEIN_UBIQUITINATION_INVOLVED_IN_UBIQUITIN_DEPENDENT_PROTEIN_CATABOLIC_PROCESS	Details ...	101	0.5931	1.88866	0.0116505	0.0183307	0.689	5639	tags=53%, list=18%, signal=65%
GO_REGULATION_OF_CELL_AGING	GO_REGULATION_OF_CELL_AGING	Details ...	32	0.578642	1.8874	0.00411523	0.0184919	0.691	3643	tags=41%, list=11%, signal=46%
GO_DNA_DAMAGE_RESPONSE_SIGNAL_TRANSDUCTION_RESULTING_IN_TRANSCRIPTION	GO_DNA_DAMAGE_RESPONSE_SIGNAL_TRANSDUCTION_RESULTING_IN_TRANSCRIPTION	Details ...	15	0.658556	1.88695	0.00550459	0.0185124	0.692	2064	tags=33%, list=6%, signal=36%
GO_NEURAL_TUBE_FORMATION	GO_NEURAL_TUBE_FORMATION	Details ...	94	0.497414	1.88693	0.00198413	0.0184546	0.692	4182	tags=32%, list=13%, signal=37%
GO_PROTEIN_HETEROOLIGOMERIZATION	GO_PROTEIN_HETEROOLIGOMERIZATION	Details ...	103	0.470208	1.88687	<0.0001	0.0184108	0.692	5508	tags=44%, list=17%, signal=53%
GO_SOMATIC_RECOMBINATION_OF_IMMUNOGLOBULIN_GENE_SEGMENTS	GO_SOMATIC_RECOMBINATION_OF_IMMUNOGLOBULIN_GENE_SEGMENTS	Details ...	21	0.659657	1.88685	0.00192308	0.0183537	0.692	1202	tags=38%, list=4%, signal=40%
GO_SPINDLE_LOCALIZATION	GO_SPINDLE_LOCALIZATION	Details ...	36	0.629433	1.88603	0.00574713	0.0184536	0.694	4453	tags=50%, list=14%, signal=58%
GO_INTERCELLULAR_BRIDGE	GO_INTERCELLULAR_BRIDGE	Details ...	40	0.535877	1.88463	0.00204499	0.0187019	0.696	5337	tags=38%, list=17%, signal=45%
GO_IN_UTERO_EMBRYONIC_DEVELOPMENT	GO_IN_UTERO_EMBRYONIC_DEVELOPMENT	Details ...	300	0.425661	1.88331	<0.0001	0.0189278	0.698	5473	tags=33%, list=17%, signal=40%
GO_TRNA_BINDING	GO_TRNA_BINDING	Details ...	43	0.63176	1.88293	0.00833333	0.0189335	0.698	4642	tags=49%, list=15%, signal=57%
GO_RNA_POLYMERASE_II_CARBOXY_TERMINAL_DOMAIN_KINASE_ACTIVITY	GO_RNA_POLYMERASE_II_CARBOXY_TERMINAL_DOMAIN_KINASE_ACTIVITY	Details ...	16	0.67818	1.88181	<0.0001	0.0190964	0.699	2048	tags=44%, list=6%, signal=47%
GO_POSITIVE_REGULATION_OF_CYCLIN_DEPENDENT_PROTEIN_KINASE_ACTIVITY	GO_POSITIVE_REGULATION_OF_CYCLIN_DEPENDENT_PROTEIN_KINASE_ACTIVITY	Details ...	33	0.529524	1.88144	<0.0001	0.0191193	0.699	899	tags=21%, list=3%, signal=22%
GO_NUCLEAR_NUCLEOSOME	GO_NUCLEAR_NUCLEOSOME	Details ...	33	0.742634	1.88101	0.00804829	0.0191666	0.701	6050	tags=85%, list=19%, signal=105%
GO_CARBOXY_TERMINAL_DOMAIN_PROTEIN_KINASE_COMPLEX	GO_CARBOXY_TERMINAL_DOMAIN_PROTEIN_KINASE_COMPLEX	Details ...	22	0.654353	1.87923	0.00590551	0.0194797	0.709	6113	tags=64%, list=19%, signal=79%
GO_MICROTUBULE_ASSOCIATED_COMPLEX	GO_MICROTUBULE_ASSOCIATED_COMPLEX	Details ...	141	0.464152	1.87918	<0.0001	0.0194296	0.709	3660	tags=26%, list=12%, signal=30%
GO_TELOMERE_CAPPING	GO_TELOMERE_CAPPING	Details ...	24	0.659806	1.87736	0.00194175	0.0197876	0.714	5897	tags=63%, list=19%, signal=77%
GO_POSITIVE_REGULATION_OF_PROTEASOMAL_PROTEIN_CATABOLIC_PROCESS	GO_POSITIVE_REGULATION_OF_PROTEASOMAL_PROTEIN_CATABOLIC_PROCESS	Details ...	96	0.490692	1.87688	<0.0001	0.0198302	0.715	5639	tags=49%, list=18%, signal=59%
GO_REGULATION_OF_CELLULAR_RESPONSE_TO_HEAT	GO_REGULATION_OF_CELLULAR_RESPONSE_TO_HEAT	Details ...	72	0.602431	1.87601	0.00402414	0.0199223	0.717	4785	tags=51%, list=15%, signal=60%
GO_NIK_NF_KAPPAB_SIGNALING	GO_NIK_NF_KAPPAB_SIGNALING	Details ...	82	0.608656	1.87403	0.00954198	0.020335	0.722	6465	tags=56%, list=20%, signal=70%
GO_ERROR_PRONE_TRANSLESION_SYNTHESIS	GO_ERROR_PRONE_TRANSLESION_SYNTHESIS	Details ...	19	0.672268	1.87389	0.00400802	0.0203156	0.722	2356	tags=42%, list=7%, signal=45%
GO_NUCLEOBASE_METABOLIC_PROCESS	GO_NUCLEOBASE_METABOLIC_PROCESS	Details ...	38	0.567932	1.87221	0.00753296	0.02063	0.726	4087	tags=42%, list=13%, signal=48%
GO_EPIDERMAL_CELL_DIFFERENTIATION	GO_EPIDERMAL_CELL_DIFFERENTIATION	Details ...	118	0.497917	1.87008	<0.0001	0.0210588	0.731	6979	tags=53%, list=22%, signal=68%
GO_ATPASE_ACTIVITY_COUPLED	GO_ATPASE_ACTIVITY_COUPLED	Details ...	309	0.441829	1.87001	0.00200401	0.0210067	0.731	5774	tags=37%, list=18%, signal=45%
GO_ORGANELLE_ASSEMBLY	GO_ORGANELLE_ASSEMBLY	Details ...	451	0.420581	1.86844	<0.0001	0.0213397	0.736	6334	tags=36%, list=20%, signal=45%
GO_NUCLEOTIDE_EXCISION_REPAIR_DNA_INCISION	GO_NUCLEOTIDE_EXCISION_REPAIR_DNA_INCISION	Details ...	39	0.581628	1.86763	0.00598802	0.021483	0.739	6621	tags=54%, list=21%, signal=68%
GO_PROTEIN_IMPORT	GO_PROTEIN_IMPORT	Details ...	150	0.453295	1.86723	0.00400802	0.0215093	0.739	6303	tags=42%, list=20%, signal=52%
GO_REGULATION_OF_CHROMATIN_SILENCING	GO_REGULATION_OF_CHROMATIN_SILENCING	Details ...	21	0.666106	1.86649	<0.0001	0.021638	0.742	2507	tags=33%, list=8%, signal=36%
GO_REGULATION_OF_DOUBLE_STRAND_BREAK_REPAIR_VIA_HOMOLOGOUS_RECOMBINATION	GO_REGULATION_OF_DOUBLE_STRAND_BREAK_REPAIR_VIA_HOMOLOGOUS_RECOMBINATION	Details ...	17	0.640274	1.86599	0.00761905	0.0216772	0.744	4372	tags=53%, list=14%, signal=61%
GO_RNA_POLYMERASE_ACTIVITY	GO_RNA_POLYMERASE_ACTIVITY	Details ...	42	0.610984	1.86574	0.006	0.0216496	0.744	4417	tags=45%, list=14%, signal=52%
GO_CELLULAR_RESPONSE_TO_LIGHT_STIMULUS	GO_CELLULAR_RESPONSE_TO_LIGHT_STIMULUS	Details ...	85	0.45979	1.86567	<0.0001	0.0215976	0.744	3384	tags=31%, list=11%, signal=34%
GO_LIGASE_ACTIVITY_FORMING_CARBON_OXYGEN_BONDS	GO_LIGASE_ACTIVITY_FORMING_CARBON_OXYGEN_BONDS	Details ...	44	0.664748	1.8651	0.020202	0.0217124	0.746	4642	tags=55%, list=15%, signal=64%
GO_TRANSCRIPTION_COUPLED_NUCLEOTIDE_EXCISION_REPAIR	GO_TRANSCRIPTION_COUPLED_NUCLEOTIDE_EXCISION_REPAIR	Details ...	72	0.586556	1.86413	0.00610998	0.0218861	0.748	5519	tags=47%, list=17%, signal=57%
GO_GALACTOSYLTRANSFERASE_ACTIVITY	GO_GALACTOSYLTRANSFERASE_ACTIVITY	Details ...	29	0.635375	1.86404	0.00773694	0.0218332	0.749	6185	tags=59%, list=19%, signal=73%
GO_POSTTRANSCRIPTIONAL_REGULATION_OF_GENE_EXPRESSION	GO_POSTTRANSCRIPTIONAL_REGULATION_OF_GENE_EXPRESSION	Details ...	414	0.450441	1.86314	0.00403226	0.0219705	0.752	5684	tags=39%, list=18%, signal=47%
GO_DOUBLE_STRANDED_RNA_BINDING	GO_DOUBLE_STRANDED_RNA_BINDING	Details ...	59	0.5606	1.86057	0.00390625	0.022492	0.76	4052	tags=46%, list=13%, signal=52%
GO_REGULATION_OF_CELL_CYCLE_CHECKPOINT	GO_REGULATION_OF_CELL_CYCLE_CHECKPOINT	Details ...	27	0.579342	1.86033	0.00402414	0.0225044	0.762	4850	tags=44%, list=15%, signal=52%
GO_POSITIVE_REGULATION_OF_MITOCHONDRIAL_OUTER_MEMBRANE_PERMEABILIZATION_INVOLVED_IN_APOPTOTIC_SIGNALING_PATHWAY	GO_POSITIVE_REGULATION_OF_MITOCHONDRIAL_OUTER_MEMBRANE_PERMEABILIZATION_INVOLVED_IN_APOPTOTIC_SIGNALING_PATHWAY	Details ...	36	0.602289	1.8596	0.00976562	0.0226466	0.764	5841	tags=56%, list=18%, signal=68%
GO_RESPONSE_TO_RADIATION	GO_RESPONSE_TO_RADIATION	Details ...	387	0.393917	1.85925	<0.0001	0.022635	0.764	5613	tags=34%, list=18%, signal=40%
GO_RNA_PHOSPHODIESTER_BOND_HYDROLYSIS_EXONUCLEOLYTIC	GO_RNA_PHOSPHODIESTER_BOND_HYDROLYSIS_EXONUCLEOLYTIC	Details ...	33	0.594637	1.85789	0.00585938	0.0229102	0.768	5137	tags=52%, list=16%, signal=61%
GO_ENDONUCLEASE_ACTIVITY	GO_ENDONUCLEASE_ACTIVITY	Details ...	115	0.45542	1.85756	0.0020284	0.0228957	0.768	3015	tags=25%, list=9%, signal=28%
GO_CAJAL_BODY	GO_CAJAL_BODY	Details ...	49	0.555853	1.85621	0.00407332	0.0231571	0.77	5940	tags=51%, list=19%, signal=63%
GO_MOTOR_ACTIVITY	GO_MOTOR_ACTIVITY	Details ...	129	0.436511	1.85615	<0.0001	0.0231074	0.771	3660	tags=25%, list=12%, signal=28%
GO_RNA_POLYMERASE_COMPLEX	GO_RNA_POLYMERASE_COMPLEX	Details ...	118	0.504822	1.85473	0.00607287	0.0233652	0.773	7513	tags=46%, list=24%, signal=60%
GO_PYRIMIDINE_NUCLEOBASE_METABOLIC_PROCESS	GO_PYRIMIDINE_NUCLEOBASE_METABOLIC_PROCESS	Details ...	19	0.651403	1.85275	0.0056926	0.0237307	0.777	7520	tags=68%, list=24%, signal=90%
GO_CENTROSOME_LOCALIZATION	GO_CENTROSOME_LOCALIZATION	Details ...	17	0.687962	1.85181	0.00763359	0.023869	0.778	3938	tags=47%, list=12%, signal=54%
GO_CYCLIN_DEPENDENT_PROTEIN_SERINE_THREONINE_KINASE_REGULATOR_ACTIVITY	GO_CYCLIN_DEPENDENT_PROTEIN_SERINE_THREONINE_KINASE_REGULATOR_ACTIVITY	Details ...	27	0.565652	1.85176	0.00393701	0.0238145	0.778	3563	tags=33%, list=11%, signal=38%
GO_REGULATION_OF_DNA_RECOMBINATION	GO_REGULATION_OF_DNA_RECOMBINATION	Details ...	53	0.53517	1.85086	0.00195312	0.0239983	0.78	1168	tags=26%, list=4%, signal=27%
GO_AMINO_ACID_ACTIVATION	GO_AMINO_ACID_ACTIVATION	Details ...	51	0.65617	1.84909	0.0184049	0.0243728	0.784	4642	tags=53%, list=15%, signal=62%
GO_GAMMA_TUBULIN_COMPLEX	GO_GAMMA_TUBULIN_COMPLEX	Details ...	19	0.614717	1.84817	0.00209644	0.0245641	0.785	2380	tags=37%, list=7%, signal=40%
GO_PROTEASOME_COMPLEX	GO_PROTEASOME_COMPLEX	Details ...	74	0.658852	1.84661	0.0155642	0.0248673	0.788	7493	tags=66%, list=24%, signal=86%
GO_PROTEIN_LOCALIZATION_TO_NUCLEUS	GO_PROTEIN_LOCALIZATION_TO_NUCLEUS	Details ...	151	0.446557	1.8466	0.00198413	0.0247966	0.788	6303	tags=40%, list=20%, signal=50%
GO_NUCLEOID	GO_NUCLEOID	Details ...	39	0.66778	1.84632	0.0102041	0.0247951	0.788	7638	tags=64%, list=24%, signal=84%
GO_TRANSCRIPTION_FROM_RNA_POLYMERASE_I_PROMOTER	GO_TRANSCRIPTION_FROM_RNA_POLYMERASE_I_PROMOTER	Details ...	35	0.573727	1.84625	0.00614754	0.024757	0.79	6113	tags=49%, list=19%, signal=60%
GO_POSITIVE_REGULATION_OF_PROTEIN_CATABOLIC_PROCESS	GO_POSITIVE_REGULATION_OF_PROTEIN_CATABOLIC_PROCESS	Details ...	254	0.455494	1.84502	0.00191939	0.0250349	0.791	6261	tags=44%, list=20%, signal=54%
GO_FOLIC_ACID_CONTAINING_COMPOUND_METABOLIC_PROCESS	GO_FOLIC_ACID_CONTAINING_COMPOUND_METABOLIC_PROCESS	Details ...	28	0.602399	1.84273	<0.0001	0.0255357	0.796	3520	tags=43%, list=11%, signal=48%
GO_REGULATION_OF_DNA_BIOSYNTHETIC_PROCESS	GO_REGULATION_OF_DNA_BIOSYNTHETIC_PROCESS	Details ...	90	0.476097	1.8412	0.00583658	0.0258363	0.796	2377	tags=27%, list=7%, signal=29%
GO_POSITIVE_REGULATION_OF_TELOMERASE_ACTIVITY	GO_POSITIVE_REGULATION_OF_TELOMERASE_ACTIVITY	Details ...	27	0.59905	1.83773	0.00397614	0.0267009	0.805	3935	tags=41%, list=12%, signal=46%
GO_PROTEIN_POLYUBIQUITINATION	GO_PROTEIN_POLYUBIQUITINATION	Details ...	236	0.4698	1.83581	0.00578035	0.0271362	0.807	5657	tags=39%, list=18%, signal=48%
GO_CHROMATIN_MODIFICATION	GO_CHROMATIN_MODIFICATION	Details ...	489	0.42588	1.83331	0.00584795	0.027837	0.814	5897	tags=35%, list=19%, signal=43%
GO_NEGATIVE_REGULATION_OF_CELL_AGING	GO_NEGATIVE_REGULATION_OF_CELL_AGING	Details ...	16	0.635533	1.83306	0.00207039	0.0278277	0.815	2369	tags=38%, list=7%, signal=41%
GO_DNA_DEPENDENT_DNA_REPLICATION_MAINTENANCE_OF_FIDELITY	GO_DNA_DEPENDENT_DNA_REPLICATION_MAINTENANCE_OF_FIDELITY	Details ...	19	0.669043	1.8311	0.010101	0.0284177	0.817	1462	tags=47%, list=5%, signal=50%
GO_PROTEIN_LOCALIZATION_TO_CYTOSKELETON	GO_PROTEIN_LOCALIZATION_TO_CYTOSKELETON	Details ...	28	0.62805	1.83043	<0.0001	0.0284958	0.818	4782	tags=43%, list=15%, signal=50%
GO_CELLULAR_RESPONSE_TO_DSRNA	GO_CELLULAR_RESPONSE_TO_DSRNA	Details ...	32	0.545288	1.82876	0.0019685	0.0288642	0.824	5670	tags=44%, list=18%, signal=53%
GO_ISOTYPE_SWITCHING	GO_ISOTYPE_SWITCHING	Details ...	16	0.658339	1.82815	0.00371058	0.0289747	0.828	1202	tags=38%, list=4%, signal=39%
GO_REGULATION_OF_PROTEIN_CATABOLIC_PROCESS	GO_REGULATION_OF_PROTEIN_CATABOLIC_PROCESS	Details ...	378	0.437308	1.82785	0.00195312	0.0289687	0.829	5710	tags=38%, list=18%, signal=46%
GO_CUL4_RING_E3_UBIQUITIN_LIGASE_COMPLEX	GO_CUL4_RING_E3_UBIQUITIN_LIGASE_COMPLEX	Details ...	25	0.608977	1.8265	0.00200401	0.0292458	0.831	6167	tags=48%, list=19%, signal=60%
GO_NUCLEOBASE_CONTAINING_SMALL_MOLECULE_INTERCONVERSION	GO_NUCLEOBASE_CONTAINING_SMALL_MOLECULE_INTERCONVERSION	Details ...	21	0.677558	1.82346	0.00190476	0.0301494	0.839	7574	tags=71%, list=24%, signal=94%
GO_REGULATION_OF_MITOCHONDRIAL_OUTER_MEMBRANE_PERMEABILIZATION_INVOLVED_IN_APOPTOTIC_SIGNALING_PATHWAY	GO_REGULATION_OF_MITOCHONDRIAL_OUTER_MEMBRANE_PERMEABILIZATION_INVOLVED_IN_APOPTOTIC_SIGNALING_PATHWAY	Details ...	42	0.571532	1.82229	0.0077821	0.0304636	0.842	5841	tags=52%, list=18%, signal=64%
GO_UDP_GALACTOSYLTRANSFERASE_ACTIVITY	GO_UDP_GALACTOSYLTRANSFERASE_ACTIVITY	Details ...	25	0.642229	1.82213	0.00395257	0.0304399	0.842	6185	tags=60%, list=19%, signal=74%
GO_PLACENTA_DEVELOPMENT	GO_PLACENTA_DEVELOPMENT	Details ...	134	0.438484	1.82183	<0.0001	0.0304984	0.845	6195	tags=37%, list=19%, signal=46%
GO_NEGATIVE_REGULATION_OF_RESPONSE_TO_DNA_DAMAGE_STIMULUS	GO_NEGATIVE_REGULATION_OF_RESPONSE_TO_DNA_DAMAGE_STIMULUS	Details ...	49	0.509663	1.82018	0.00202429	0.0308966	0.848	5423	tags=43%, list=17%, signal=52%
GO_EPITHELIAL_CELL_APOPTOTIC_PROCESS	GO_EPITHELIAL_CELL_APOPTOTIC_PROCESS	Details ...	24	0.578419	1.81545	0.00579151	0.0322628	0.852	1783	tags=33%, list=6%, signal=35%
GO_POSITIVE_REGULATION_OF_DNA_TEMPLATED_TRANSCRIPTION_INITIATION	GO_POSITIVE_REGULATION_OF_DNA_TEMPLATED_TRANSCRIPTION_INITIATION	Details ...	24	0.580125	1.8129	0.00591716	0.0331535	0.853	5392	tags=54%, list=17%, signal=65%
GO_RNA_PHOSPHODIESTER_BOND_HYDROLYSIS	GO_RNA_PHOSPHODIESTER_BOND_HYDROLYSIS	Details ...	107	0.489499	1.8079	0.0122699	0.0348263	0.858	4012	tags=34%, list=13%, signal=38%
GO_PROTEIN_DEPOLYMERIZATION	GO_PROTEIN_DEPOLYMERIZATION	Details ...	23	0.587017	1.80683	0.00193424	0.0351161	0.86	3456	tags=39%, list=11%, signal=44%
GO_GOLGI_ORGANIZATION	GO_GOLGI_ORGANIZATION	Details ...	83	0.530435	1.80661	0.0117417	0.0350936	0.86	5943	tags=48%, list=19%, signal=59%
GO_ATP_DEPENDENT_MICROTUBULE_MOTOR_ACTIVITY	GO_ATP_DEPENDENT_MICROTUBULE_MOTOR_ACTIVITY	Details ...	18	0.671769	1.80601	0.011236	0.03525	0.863	67	tags=33%, list=0%, signal=33%
GO_NUCLEOTIDE_PHOSPHORYLATION	GO_NUCLEOTIDE_PHOSPHORYLATION	Details ...	55	0.547499	1.80539	0.0118343	0.0353626	0.865	7574	tags=60%, list=24%, signal=79%
GO_CHROMATIN_BINDING	GO_CHROMATIN_BINDING	Details ...	406	0.411286	1.80199	0.00383142	0.0364745	0.87	6259	tags=39%, list=20%, signal=48%
GO_FOLIC_ACID_METABOLIC_PROCESS	GO_FOLIC_ACID_METABOLIC_PROCESS	Details ...	18	0.617051	1.79912	0.00596422	0.0373913	0.877	3520	tags=44%, list=11%, signal=50%
GO_DNA_DIRECTED_RNA_POLYMERASE_II_HOLOENZYME	GO_DNA_DIRECTED_RNA_POLYMERASE_II_HOLOENZYME	Details ...	93	0.485224	1.79723	0.00403226	0.037945	0.878	7513	tags=43%, list=24%, signal=56%
GO_PROTEIN_EXPORT_FROM_NUCLEUS	GO_PROTEIN_EXPORT_FROM_NUCLEUS	Details ...	29	0.570387	1.79708	0.00821355	0.0379345	0.878	5208	tags=48%, list=16%, signal=58%
GO_CELL_CELL_JUNCTION_ASSEMBLY	GO_CELL_CELL_JUNCTION_ASSEMBLY	Details ...	71	0.482664	1.79696	0.00395257	0.037868	0.878	4556	tags=44%, list=14%, signal=51%
GO_ANATOMICAL_STRUCTURE_ARRANGEMENT	GO_ANATOMICAL_STRUCTURE_ARRANGEMENT	Details ...	17	0.603832	1.79592	0.00585938	0.038164	0.879	4141	tags=47%, list=13%, signal=54%
GO_DNA_TEMPLATED_TRANSCRIPTION_INITIATION	GO_DNA_TEMPLATED_TRANSCRIPTION_INITIATION	Details ...	195	0.404253	1.79494	<0.0001	0.0384484	0.88	6698	tags=41%, list=21%, signal=51%
GO_PROTEIN_MONOUBIQUITINATION	GO_PROTEIN_MONOUBIQUITINATION	Details ...	50	0.561304	1.78986	0.0193798	0.0402641	0.886	7062	tags=50%, list=22%, signal=64%
GO_TETRAHYDROFOLATE_METABOLIC_PROCESS	GO_TETRAHYDROFOLATE_METABOLIC_PROCESS	Details ...	20	0.624616	1.78929	0.00198807	0.0403769	0.886	3079	tags=45%, list=10%, signal=50%
GO_INTRINSIC_APOPTOTIC_SIGNALING_PATHWAY_IN_RESPONSE_TO_DNA_DAMAGE	GO_INTRINSIC_APOPTOTIC_SIGNALING_PATHWAY_IN_RESPONSE_TO_DNA_DAMAGE	Details ...	70	0.454866	1.78904	0.00552486	0.0403608	0.886	5684	tags=39%, list=18%, signal=47%
GO_POSTTRANSCRIPTIONAL_GENE_SILENCING	GO_POSTTRANSCRIPTIONAL_GENE_SILENCING	Details ...	36	0.551701	1.78377	0.00970874	0.0423635	0.893	5426	tags=47%, list=17%, signal=57%
GO_NEGATIVE_REGULATION_OF_DNA_METABOLIC_PROCESS	GO_NEGATIVE_REGULATION_OF_DNA_METABOLIC_PROCESS	Details ...	105	0.457164	1.78328	0.00588235	0.0424952	0.893	5121	tags=38%, list=16%, signal=45%
GO_CELL_SEPARATION_AFTER_CYTOKINESIS	GO_CELL_SEPARATION_AFTER_CYTOKINESIS	Details ...	17	0.717692	1.78311	0.00590551	0.0424367	0.893	4201	tags=65%, list=13%, signal=75%
GO_INTRINSIC_APOPTOTIC_SIGNALING_PATHWAY_IN_RESPONSE_TO_DNA_DAMAGE_BY_P53_CLASS_MEDIATOR	GO_INTRINSIC_APOPTOTIC_SIGNALING_PATHWAY_IN_RESPONSE_TO_DNA_DAMAGE_BY_P53_CLASS_MEDIATOR	Details ...	29	0.554504	1.78308	0.0038835	0.042343	0.893	5360	tags=41%, list=17%, signal=50%
GO_ORGANELLE_LOCALIZATION	GO_ORGANELLE_LOCALIZATION	Details ...	392	0.41434	1.7822	0.00749064	0.0425894	0.893	5602	tags=33%, list=18%, signal=40%
GO_SYNAPSIS	GO_SYNAPSIS	Details ...	28	0.569242	1.78215	0.00606061	0.0424948	0.893	5093	tags=43%, list=16%, signal=51%
GO_PROTEIN_LOCALIZATION_TO_CENTROSOME	GO_PROTEIN_LOCALIZATION_TO_CENTROSOME	Details ...	15	0.664405	1.78116	0.0100806	0.042799	0.896	845	tags=27%, list=3%, signal=27%
GO_PYRIMIDINE_CONTAINING_COMPOUND_BIOSYNTHETIC_PROCESS	GO_PYRIMIDINE_CONTAINING_COMPOUND_BIOSYNTHETIC_PROCESS	Details ...	38	0.567558	1.77977	0.0119284	0.0432561	0.897	7520	tags=58%, list=24%, signal=76%
GO_SOMATIC_CELL_DNA_RECOMBINATION	GO_SOMATIC_CELL_DNA_RECOMBINATION	Details ...	31	0.591108	1.77956	0.00976562	0.0432349	0.897	2145	tags=35%, list=7%, signal=38%
GO_REGULATION_OF_TRANSCRIPTION_INITIATION_FROM_RNA_POLYMERASE_II_PROMOTER	GO_REGULATION_OF_TRANSCRIPTION_INITIATION_FROM_RNA_POLYMERASE_II_PROMOTER	Details ...	23	0.561414	1.77939	0.00588235	0.0431923	0.898	5392	tags=57%, list=17%, signal=68%
GO_REGULATION_OF_PROTEIN_PHOSPHATASE_TYPE_2A_ACTIVITY	GO_REGULATION_OF_PROTEIN_PHOSPHATASE_TYPE_2A_ACTIVITY	Details ...	23	0.606034	1.77896	0.00784314	0.043248	0.899	4147	tags=52%, list=13%, signal=60%
GO_DSRNA_FRAGMENTATION	GO_DSRNA_FRAGMENTATION		17	0.607686	1.77356	0.00972763	0.045405	0.901	5131	tags=47%, list=16%, signal=56%
GO_RNA_CAPPING	GO_RNA_CAPPING		34	0.600047	1.77067	0.0141988	0.0465146	0.905	6113	tags=50%, list=19%, signal=62%
GO_EMBRYONIC_PLACENTA_MORPHOGENESIS	GO_EMBRYONIC_PLACENTA_MORPHOGENESIS		22	0.566703	1.77053	0.0119284	0.0464367	0.905	2937	tags=41%, list=9%, signal=45%
GO_PROTEIN_KINASE_COMPLEX	GO_PROTEIN_KINASE_COMPLEX		88	0.461003	1.77008	0.00782779	0.0465208	0.905	5698	tags=39%, list=18%, signal=47%
GO_PTERIDINE_CONTAINING_COMPOUND_METABOLIC_PROCESS	GO_PTERIDINE_CONTAINING_COMPOUND_METABOLIC_PROCESS		35	0.555046	1.76885	0.00199601	0.0469478	0.905	3520	tags=37%, list=11%, signal=42%
GO_ESTABLISHMENT_OF_CELL_POLARITY	GO_ESTABLISHMENT_OF_CELL_POLARITY		85	0.471144	1.76828	0.00573614	0.0470786	0.906	4526	tags=40%, list=14%, signal=47%
GO_SKIN_DEVELOPMENT	GO_SKIN_DEVELOPMENT		184	0.440651	1.76698	0.00591716	0.0475642	0.907	6963	tags=47%, list=22%, signal=60%
GO_POSITIVE_REGULATION_OF_PROTEOLYSIS	GO_POSITIVE_REGULATION_OF_PROTEOLYSIS		351	0.418732	1.76665	0.00391389	0.047582	0.907	6444	tags=42%, list=20%, signal=53%
GO_POSITIVE_REGULATION_OF_NUCLEASE_ACTIVITY	GO_POSITIVE_REGULATION_OF_NUCLEASE_ACTIVITY		15	0.661752	1.76656	0.00772201	0.0475022	0.907	2904	tags=47%, list=9%, signal=51%
GO_NUCLEAR_TRANSCRIBED_MRNA_POLY_A_TAIL_SHORTENING	GO_NUCLEAR_TRANSCRIBED_MRNA_POLY_A_TAIL_SHORTENING		23	0.642535	1.76444	0.0117188	0.0483066	0.909	3419	tags=48%, list=11%, signal=54%
GO_NEGATIVE_REGULATION_OF_PROTEIN_CATABOLIC_PROCESS	GO_NEGATIVE_REGULATION_OF_PROTEIN_CATABOLIC_PROCESS		103	0.44157	1.76424	0.00779727	0.0483097	0.909	3396	tags=26%, list=11%, signal=29%
GO_ESTABLISHMENT_OR_MAINTENANCE_OF_BIPOLAR_CELL_POLARITY	GO_ESTABLISHMENT_OR_MAINTENANCE_OF_BIPOLAR_CELL_POLARITY		34	0.526766	1.76378	0.00773694	0.0483822	0.91	4182	tags=44%, list=13%, signal=51%
GO_MICROTUBULE_END	GO_MICROTUBULE_END		21	0.654604	1.76321	0.0173745	0.0485355	0.911	5066	tags=48%, list=16%, signal=57%
GO_ENDOSOME_ORGANIZATION	GO_ENDOSOME_ORGANIZATION		61	0.519773	1.76271	0.00992064	0.0486352	0.911	6251	tags=43%, list=20%, signal=53%
GO_MITOCHONDRIAL_MEMBRANE_ORGANIZATION	GO_MITOCHONDRIAL_MEMBRANE_ORGANIZATION		90	0.50111	1.76208	0.0214008	0.0487956	0.911	5841	tags=40%, list=18%, signal=49%
GO_CYTOPLASMIC_MICROTUBULE	GO_CYTOPLASMIC_MICROTUBULE		51	0.494551	1.76187	0.00583658	0.0487673	0.911	4341	tags=29%, list=14%, signal=34%
GO_UBIQUITIN_LIKE_PROTEIN_LIGASE_BINDING	GO_UBIQUITIN_LIKE_PROTEIN_LIGASE_BINDING		256	0.412022	1.76184	0.00965251	0.0486596	0.911	6378	tags=41%, list=20%, signal=51%
GO_NUCLEOBASE_BIOSYNTHETIC_PROCESS	GO_NUCLEOBASE_BIOSYNTHETIC_PROCESS		18	0.666568	1.76151	0.0197239	0.0487096	0.912	4087	tags=56%, list=13%, signal=64%
GO_EUCHROMATIN	GO_EUCHROMATIN		29	0.520741	1.76059	0.0172745	0.0489921	0.914	2007	tags=24%, list=6%, signal=26%
GO_PORE_COMPLEX_ASSEMBLY	GO_PORE_COMPLEX_ASSEMBLY		15	0.713778	1.75994	0.00784314	0.0491375	0.915	4146	tags=67%, list=13%, signal=77%
GO_COVALENT_CHROMATIN_MODIFICATION	GO_COVALENT_CHROMATIN_MODIFICATION		309	0.41153	1.7578	0.00795229	0.0499943	0.918	5736	tags=34%, list=18%, signal=41%
GO_RNA_SPLICING_VIA_TRANSESTERIFICATION_REACTIONS	GO_RNA_SPLICING_VIA_TRANSESTERIFICATION_REACTIONS		258	0.462589	1.75762	0.0179641	0.0499592	0.918	5440	tags=38%, list=17%, signal=46%
GO_MICROTUBULE_BINDING	GO_MICROTUBULE_BINDING		189	0.442709	1.75545	0.00767754	0.050762	0.921	5333	tags=34%, list=17%, signal=41%
GO_OXIDOREDUCTASE_ACTIVITY_ACTING_ON_PAIRED_DONORS_WITH_INCORPORATION_OR_REDUCTION_OF_MOLECULAR_OXYGEN_2_OXOGLUTARATE_AS_ONE_DONOR_AND_INCORPORATION_OF_ONE_ATOM_EACH_OF_OXYGEN_INTO_BOTH_DONORS	GO_OXIDOREDUCTASE_ACTIVITY_ACTING_ON_PAIRED_DONORS_WITH_INCORPORATION_OR_REDUCTION_OF_MOLECULAR_OXYGEN_2_OXOGLUTARATE_AS_ONE_DONOR_AND_INCORPORATION_OF_ONE_ATOM_EACH_OF_OXYGEN_INTO_BOTH_DONORS		39	0.52971	1.75473	0.00819672	0.0510367	0.922	5359	tags=41%, list=17%, signal=49%
GO_MORPHOGENESIS_OF_EMBRYONIC_EPITHELIUM	GO_MORPHOGENESIS_OF_EMBRYONIC_EPITHELIUM		133	0.431502	1.75308	0.00793651	0.0516831	0.925	4182	tags=30%, list=13%, signal=34%
GO_LABYRINTHINE_LAYER_DEVELOPMENT	GO_LABYRINTHINE_LAYER_DEVELOPMENT		43	0.494294	1.75291	0.00192678	0.0516326	0.925	5197	tags=40%, list=16%, signal=47%
GO_SNRNA_METABOLIC_PROCESS	GO_SNRNA_METABOLIC_PROCESS		75	0.494503	1.75232	0.0159363	0.0518324	0.927	8089	tags=47%, list=25%, signal=62%
GO_LUNG_MORPHOGENESIS	GO_LUNG_MORPHOGENESIS		45	0.504334	1.75197	0.0100806	0.0519	0.927	2794	tags=31%, list=9%, signal=34%
GO_HEAT_SHOCK_PROTEIN_BINDING	GO_HEAT_SHOCK_PROTEIN_BINDING		87	0.479951	1.74963	0.0176817	0.0528171	0.93	5740	tags=41%, list=18%, signal=50%
GO_RNA_POLYMERASE_II_TRANSCRIPTION_FACTOR_COMPLEX	GO_RNA_POLYMERASE_II_TRANSCRIPTION_FACTOR_COMPLEX		98	0.430898	1.74813	0.0020202	0.05339	0.93	6195	tags=40%, list=19%, signal=49%
GO_LYSINE_ACETYLATED_HISTONE_BINDING	GO_LYSINE_ACETYLATED_HISTONE_BINDING		15	0.709089	1.7481	0.00591716	0.0532752	0.93	5651	tags=60%, list=18%, signal=73%
GO_REGULATION_OF_PROTEIN_EXPORT_FROM_NUCLEUS	GO_REGULATION_OF_PROTEIN_EXPORT_FROM_NUCLEUS		33	0.517381	1.74785	0.00401606	0.0532962	0.93	3668	tags=42%, list=12%, signal=48%
GO_PYRIMIDINE_NUCLEOSIDE_BIOSYNTHETIC_PROCESS	GO_PYRIMIDINE_NUCLEOSIDE_BIOSYNTHETIC_PROCESS		28	0.595848	1.74656	0.00968992	0.053829	0.931	5610	tags=50%, list=18%, signal=61%
GO_PROTEIN_K63_LINKED_UBIQUITINATION	GO_PROTEIN_K63_LINKED_UBIQUITINATION		35	0.530515	1.74462	0.0225564	0.0546423	0.933	3414	tags=34%, list=11%, signal=38%
GO_MITOCHONDRIAL_RNA_METABOLIC_PROCESS	GO_MITOCHONDRIAL_RNA_METABOLIC_PROCESS		23	0.659224	1.7443	0.0283976	0.0546326	0.933	4642	tags=43%, list=15%, signal=51%
GO_LATERAL_PLASMA_MEMBRANE	GO_LATERAL_PLASMA_MEMBRANE		48	0.528015	1.74344	0.0123967	0.0549544	0.934	3475	tags=40%, list=11%, signal=44%
GO_REGULATION_OF_MITOPHAGY	GO_REGULATION_OF_MITOPHAGY		41	0.506042	1.74161	0.0128205	0.0557062	0.934	7975	tags=49%, list=25%, signal=65%
GO_TRANSLATION_INITIATION_FACTOR_ACTIVITY	GO_TRANSLATION_INITIATION_FACTOR_ACTIVITY		49	0.589127	1.74144	0.0453649	0.0556786	0.934	4800	tags=51%, list=15%, signal=60%
GO_ESTABLISHMENT_OF_SPINDLE_ORIENTATION	GO_ESTABLISHMENT_OF_SPINDLE_ORIENTATION		24	0.574604	1.74094	0.00767754	0.0558254	0.934	1364	tags=29%, list=4%, signal=30%
GO_NEGATIVE_REGULATION_OF_STEM_CELL_PROLIFERATION	GO_NEGATIVE_REGULATION_OF_STEM_CELL_PROLIFERATION		15	0.605046	1.73988	0.00974659	0.056214	0.937	4562	tags=67%, list=14%, signal=78%
GO_TUBULIN_BINDING	GO_TUBULIN_BINDING		259	0.414882	1.73869	0.0038835	0.0566707	0.937	5333	tags=33%, list=17%, signal=39%
GO_CELL_JUNCTION_ASSEMBLY	GO_CELL_JUNCTION_ASSEMBLY		125	0.483969	1.73795	0.0184805	0.0569064	0.94	4556	tags=42%, list=14%, signal=48%
GO_REGULATION_OF_HISTONE_H3_K9_METHYLATION	GO_REGULATION_OF_HISTONE_H3_K9_METHYLATION		16	0.643229	1.73637	0.0103306	0.0575813	0.94	5852	tags=63%, list=18%, signal=77%
GO_ANATOMICAL_STRUCTURE_HOMEOSTASIS	GO_ANATOMICAL_STRUCTURE_HOMEOSTASIS		264	0.373261	1.7363	0.00369004	0.0574856	0.94	6660	tags=37%, list=21%, signal=46%
GO_ESTABLISHMENT_OR_MAINTENANCE_OF_CELL_POLARITY	GO_ESTABLISHMENT_OR_MAINTENANCE_OF_CELL_POLARITY		134	0.447704	1.73598	0.0113852	0.0574926	0.94	4526	tags=38%, list=14%, signal=44%
GO_POSITIVE_REGULATION_OF_TRANSLATIONAL_INITIATION	GO_POSITIVE_REGULATION_OF_TRANSLATIONAL_INITIATION		21	0.559005	1.73458	0.0129151	0.0581082	0.94	7679	tags=67%, list=24%, signal=88%
GO_P53_BINDING	GO_P53_BINDING		66	0.455622	1.73413	0.00974659	0.0581898	0.94	3767	tags=30%, list=12%, signal=34%
GO_INTRINSIC_APOPTOTIC_SIGNALING_PATHWAY	GO_INTRINSIC_APOPTOTIC_SIGNALING_PATHWAY		148	0.391992	1.73313	0.0056926	0.0585823	0.94	5684	tags=35%, list=18%, signal=43%
GO_RRNA_TRANSCRIPTION	GO_RRNA_TRANSCRIPTION		17	0.602786	1.73204	0.0104384	0.0590927	0.942	3114	tags=35%, list=10%, signal=39%
GO_NUCLEAR_TRANSCRIPTION_FACTOR_COMPLEX	GO_NUCLEAR_TRANSCRIPTION_FACTOR_COMPLEX		124	0.414237	1.7315	0.0020284	0.0592703	0.942	5734	tags=38%, list=18%, signal=46%
GO_UNFOLDED_PROTEIN_BINDING	GO_UNFOLDED_PROTEIN_BINDING		93	0.549328	1.73029	0.038	0.0597392	0.942	6953	tags=58%, list=22%, signal=74%
GO_NUCLEOSIDE_SALVAGE	GO_NUCLEOSIDE_SALVAGE		16	0.628868	1.72854	0.0192308	0.0605929	0.943	3873	tags=44%, list=12%, signal=50%
GO_VESICLE_TARGETING	GO_VESICLE_TARGETING		75	0.499619	1.72816	0.0191939	0.0606635	0.943	6710	tags=47%, list=21%, signal=59%
GO_MRNA_CLEAVAGE_FACTOR_COMPLEX	GO_MRNA_CLEAVAGE_FACTOR_COMPLEX		17	0.632237	1.72793	0.00990099	0.0606422	0.943	4093	tags=53%, list=13%, signal=61%
GO_TBP_CLASS_PROTEIN_BINDING	GO_TBP_CLASS_PROTEIN_BINDING		19	0.610647	1.72789	0.0121457	0.0605373	0.943	5392	tags=63%, list=17%, signal=76%
GO_NUCLEAR_ENVELOPE_REASSEMBLY	GO_NUCLEAR_ENVELOPE_REASSEMBLY		17	0.692868	1.7249	0.01417	0.0621391	0.945	5300	tags=71%, list=17%, signal=85%
GO_PROTEASOME_ACCESSORY_COMPLEX	GO_PROTEASOME_ACCESSORY_COMPLEX		24	0.735852	1.72461	0.0235756	0.0621287	0.945	6945	tags=79%, list=22%, signal=101%
GO_PROTEIN_K11_LINKED_UBIQUITINATION	GO_PROTEIN_K11_LINKED_UBIQUITINATION		27	0.569998	1.72406	0.0135135	0.0622706	0.946	3296	tags=37%, list=10%, signal=41%
GO_EXECUTION_PHASE_OF_APOPTOSIS	GO_EXECUTION_PHASE_OF_APOPTOSIS		53	0.457249	1.72241	0.00584795	0.0630218	0.947	6764	tags=49%, list=21%, signal=62%
GO_CELLULAR_COMPONENT_DISASSEMBLY	GO_CELLULAR_COMPONENT_DISASSEMBLY		491	0.399141	1.7219	0.0155642	0.0631837	0.947	4528	tags=29%, list=14%, signal=33%
GO_NUCLEAR_TRANSCRIBED_MRNA_CATABOLIC_PROCESS_DEADENYLATION_DEPENDENT_DECAY	GO_NUCLEAR_TRANSCRIBED_MRNA_CATABOLIC_PROCESS_DEADENYLATION_DEPENDENT_DECAY		53	0.520235	1.72096	0.01222	0.0635341	0.947	5905	tags=45%, list=19%, signal=56%
GO_POSITIVE_REGULATION_OF_TRANSCRIPTION_INITIATION_FROM_RNA_POLYMERASE_II_PROMOTER	GO_POSITIVE_REGULATION_OF_TRANSCRIPTION_INITIATION_FROM_RNA_POLYMERASE_II_PROMOTER		17	0.578542	1.72068	0.0154143	0.0635524	0.947	5392	tags=65%, list=17%, signal=78%
GO_MLL1_2_COMPLEX	GO_MLL1_2_COMPLEX		26	0.559073	1.71891	0.00998004	0.0644004	0.947	7247	tags=58%, list=23%, signal=75%
GO_CELL_JUNCTION_ORGANIZATION	GO_CELL_JUNCTION_ORGANIZATION		175	0.454284	1.71871	0.0186335	0.0643709	0.947	4556	tags=38%, list=14%, signal=44%
GO_REGULATION_OF_MEIOTIC_CELL_CYCLE	GO_REGULATION_OF_MEIOTIC_CELL_CYCLE		37	0.475952	1.71824	0.0116505	0.0645272	0.948	4243	tags=35%, list=13%, signal=41%
GO_NEGATIVE_REGULATION_OF_EPIDERMIS_DEVELOPMENT	GO_NEGATIVE_REGULATION_OF_EPIDERMIS_DEVELOPMENT		16	0.617445	1.71787	0.0119284	0.0645749	0.948	3375	tags=31%, list=11%, signal=35%
GO_PROTEIN_TETRAMERIZATION	GO_PROTEIN_TETRAMERIZATION		126	0.419401	1.71681	0.00389105	0.0650126	0.95	7040	tags=43%, list=22%, signal=55%
GO_POSITIVE_REGULATION_OF_CELLULAR_PROTEIN_LOCALIZATION	GO_POSITIVE_REGULATION_OF_CELLULAR_PROTEIN_LOCALIZATION		335	0.379983	1.71661	0.00397614	0.0649866	0.951	6114	tags=35%, list=19%, signal=43%
GO_GLOBAL_GENOME_NUCLEOTIDE_EXCISION_REPAIR	GO_GLOBAL_GENOME_NUCLEOTIDE_EXCISION_REPAIR		32	0.550544	1.71651	0.0201613	0.0649243	0.951	6621	tags=53%, list=21%, signal=67%
GO_CELLULAR_SENESCENCE	GO_CELLULAR_SENESCENCE		31	0.506869	1.71611	0.00978474	0.0650027	0.951	2508	tags=32%, list=8%, signal=35%
GO_TUBE_FORMATION	GO_TUBE_FORMATION		129	0.42256	1.71372	0.0118577	0.0661846	0.953	4366	tags=30%, list=14%, signal=35%
GO_POSITIVE_REGULATION_OF_HISTONE_METHYLATION	GO_POSITIVE_REGULATION_OF_HISTONE_METHYLATION		28	0.540574	1.71299	0.0215686	0.0664147	0.954	5852	tags=46%, list=18%, signal=57%
GO_GAP_JUNCTION	GO_GAP_JUNCTION		27	0.543913	1.70894	0.0158103	0.068616	0.956	2845	tags=41%, list=9%, signal=45%
GO_CELLULAR_COMPONENT_DISASSEMBLY_INVOLVED_IN_EXECUTION_PHASE_OF_APOPTOSIS	GO_CELLULAR_COMPONENT_DISASSEMBLY_INVOLVED_IN_EXECUTION_PHASE_OF_APOPTOSIS		41	0.479208	1.70865	0.00594059	0.0686456	0.956	2145	tags=29%, list=7%, signal=31%
GO_NEGATIVE_REGULATION_OF_PROTEIN_BINDING	GO_NEGATIVE_REGULATION_OF_PROTEIN_BINDING		78	0.43372	1.70665	0.00976562	0.0696007	0.957	5094	tags=41%, list=16%, signal=49%
GO_PSEUDOURIDINE_SYNTHESIS	GO_PSEUDOURIDINE_SYNTHESIS		17	0.671596	1.70653	0.0287474	0.0695221	0.957	9736	tags=82%, list=31%, signal=119%
GO_RNA_SPLICING	GO_RNA_SPLICING		346	0.42831	1.70652	0.024	0.0693838	0.957	5440	tags=35%, list=17%, signal=42%
GO_REGULATION_OF_TRANSLATIONAL_INITIATION	GO_REGULATION_OF_TRANSLATIONAL_INITIATION		79	0.492647	1.70637	0.0339321	0.0693259	0.957	5684	tags=43%, list=18%, signal=52%
GO_LUNG_EPITHELIUM_DEVELOPMENT	GO_LUNG_EPITHELIUM_DEVELOPMENT		34	0.524232	1.7062	0.00996016	0.069282	0.958	4475	tags=44%, list=14%, signal=51%
GO_MRNA_PROCESSING	GO_MRNA_PROCESSING		403	0.409307	1.70467	0.0178926	0.0700331	0.959	5440	tags=34%, list=17%, signal=41%
GO_NEURAL_TUBE_DEVELOPMENT	GO_NEURAL_TUBE_DEVELOPMENT		145	0.428193	1.70362	0.00813008	0.0705369	0.96	4182	tags=30%, list=13%, signal=35%
GO_PRENYLTRANSFERASE_ACTIVITY	GO_PRENYLTRANSFERASE_ACTIVITY		15	0.646706	1.70312	0.0119522	0.0705682	0.961	9637	tags=73%, list=30%, signal=105%
GO_ANTIGEN_PROCESSING_AND_PRESENTATION_OF_PEPTIDE_ANTIGEN	GO_ANTIGEN_PROCESSING_AND_PRESENTATION_OF_PEPTIDE_ANTIGEN		169	0.498489	1.70237	0.0266667	0.0708389	0.961	2848	tags=31%, list=9%, signal=34%
GO_RIBONUCLEOPROTEIN_GRANULE	GO_RIBONUCLEOPROTEIN_GRANULE		137	0.41684	1.70028	0.00589391	0.071969	0.961	5983	tags=39%, list=19%, signal=47%
GO_ANTIGEN_PROCESSING_AND_PRESENTATION_OF_PEPTIDE_OR_POLYSACCHARIDE_ANTIGEN_VIA_MHC_CLASS_II	GO_ANTIGEN_PROCESSING_AND_PRESENTATION_OF_PEPTIDE_OR_POLYSACCHARIDE_ANTIGEN_VIA_MHC_CLASS_II		87	0.485479	1.69863	0.00776699	0.0727842	0.963	4690	tags=34%, list=15%, signal=40%
GO_REGULATION_OF_NUCLEASE_ACTIVITY	GO_REGULATION_OF_NUCLEASE_ACTIVITY		23	0.571704	1.69693	0.00788955	0.073634	0.963	4713	tags=52%, list=15%, signal=61%
GO_NEGATIVE_REGULATION_OF_BINDING	GO_NEGATIVE_REGULATION_OF_BINDING		129	0.412984	1.69686	0.00592885	0.0735171	0.963	4778	tags=34%, list=15%, signal=40%
GO_ENDOMEMBRANE_SYSTEM_ORGANIZATION	GO_ENDOMEMBRANE_SYSTEM_ORGANIZATION		446	0.394226	1.69672	0.0230326	0.0734575	0.963	6114	tags=37%, list=19%, signal=46%
GO_CADHERIN_BINDING	GO_CADHERIN_BINDING		28	0.576574	1.6957	0.026749	0.0739448	0.963	2215	tags=39%, list=7%, signal=42%
GO_MANNOSYLTRANSFERASE_ACTIVITY	GO_MANNOSYLTRANSFERASE_ACTIVITY		25	0.571146	1.69568	0.0156863	0.0738054	0.963	4986	tags=48%, list=16%, signal=57%
GO_CELLULAR_RESPONSE_TO_HEAT	GO_CELLULAR_RESPONSE_TO_HEAT		33	0.53528	1.69544	0.019305	0.0737789	0.963	5246	tags=42%, list=17%, signal=51%
GO_POST_ANAL_TAIL_MORPHOGENESIS	GO_POST_ANAL_TAIL_MORPHOGENESIS		18	0.593567	1.69473	0.0241449	0.074035	0.963	6610	tags=61%, list=21%, signal=77%
GO_MOLTING_CYCLE	GO_MOLTING_CYCLE		75	0.431689	1.69437	0.00392927	0.0740811	0.963	5129	tags=39%, list=16%, signal=46%
GO_GOLGI_VESICLE_TRANSPORT	GO_GOLGI_VESICLE_TRANSPORT		309	0.440204	1.69269	0.0331384	0.0750616	0.964	6710	tags=40%, list=21%, signal=50%
GO_TELOMERASE_HOLOENZYME_COMPLEX	GO_TELOMERASE_HOLOENZYME_COMPLEX		19	0.629543	1.69019	0.0248447	0.0764221	0.965	5818	tags=63%, list=18%, signal=77%
GO_POSITIVE_REGULATION_OF_G1_S_TRANSITION_OF_MITOTIC_CELL_CYCLE	GO_POSITIVE_REGULATION_OF_G1_S_TRANSITION_OF_MITOTIC_CELL_CYCLE		24	0.552299	1.68986	0.0116279	0.0764368	0.965	3166	tags=33%, list=10%, signal=37%
GO_PROTEIN_PHOSPHATASE_2A_BINDING	GO_PROTEIN_PHOSPHATASE_2A_BINDING		27	0.544255	1.68944	0.0222672	0.0765518	0.966	7679	tags=67%, list=24%, signal=88%
GO_POSITIVE_REGULATION_OF_CATABOLIC_PROCESS	GO_POSITIVE_REGULATION_OF_CATABOLIC_PROCESS		383	0.39115	1.68932	0.00590551	0.076462	0.966	6261	tags=38%, list=20%, signal=47%
GO_CHROMATIN_DISASSEMBLY	GO_CHROMATIN_DISASSEMBLY		15	0.610717	1.68892	0.0163599	0.0765795	0.966	964	tags=33%, list=3%, signal=34%
GO_CYTOPLASMIC_STRESS_GRANULE	GO_CYTOPLASMIC_STRESS_GRANULE		30	0.542643	1.68852	0.0284091	0.0767064	0.966	4068	tags=43%, list=13%, signal=50%
GO_RIBONUCLEASE_ACTIVITY	GO_RIBONUCLEASE_ACTIVITY		86	0.445891	1.68808	0.026	0.0768353	0.966	4012	tags=29%, list=13%, signal=33%
GO_ERROR_FREE_TRANSLESION_SYNTHESIS	GO_ERROR_FREE_TRANSLESION_SYNTHESIS		18	0.660008	1.68711	0.0273438	0.0772594	0.966	2356	tags=39%, list=7%, signal=42%
GO_LIGASE_ACTIVITY_FORMING_CARBON_NITROGEN_BONDS	GO_LIGASE_ACTIVITY_FORMING_CARBON_NITROGEN_BONDS		51	0.477824	1.68683	0.00587084	0.0773005	0.966	7601	tags=45%, list=24%, signal=59%
GO_REGULATION_OF_TELOMERASE_RNA_LOCALIZATION_TO_CAJAL_BODY	GO_REGULATION_OF_TELOMERASE_RNA_LOCALIZATION_TO_CAJAL_BODY		15	0.783296	1.68555	0.0103093	0.0779003	0.97	4146	tags=73%, list=13%, signal=84%
GO_POSITIVE_REGULATION_OF_PROTEIN_LOCALIZATION_TO_NUCLEUS	GO_POSITIVE_REGULATION_OF_PROTEIN_LOCALIZATION_TO_NUCLEUS		126	0.394815	1.68399	0.0039604	0.0786861	0.97	6017	tags=36%, list=19%, signal=44%
GO_NF_KAPPAB_BINDING	GO_NF_KAPPAB_BINDING		30	0.547315	1.68221	0.0220441	0.079668	0.971	4967	tags=47%, list=16%, signal=55%
GO_HISTONE_MONOUBIQUITINATION	GO_HISTONE_MONOUBIQUITINATION		23	0.615942	1.68191	0.0197628	0.0796824	0.971	7062	tags=61%, list=22%, signal=78%
GO_CELLULAR_RESPONSE_TO_ABIOTIC_STIMULUS	GO_CELLULAR_RESPONSE_TO_ABIOTIC_STIMULUS		247	0.386949	1.68168	0.00192308	0.0796903	0.971	3954	tags=27%, list=12%, signal=31%
GO_NUCLEAR_BODY	GO_NUCLEAR_BODY		334	0.387607	1.68162	0.0171103	0.0795606	0.971	5520	tags=32%, list=17%, signal=38%
GO_REGULATION_OF_SUBSTRATE_ADHESION_DEPENDENT_CELL_SPREADING	GO_REGULATION_OF_SUBSTRATE_ADHESION_DEPENDENT_CELL_SPREADING		40	0.513859	1.68156	0.0235294	0.0794627	0.971	4864	tags=43%, list=15%, signal=50%
GO_POSITIVE_REGULATION_OF_VIRAL_RELEASE_FROM_HOST_CELL	GO_POSITIVE_REGULATION_OF_VIRAL_RELEASE_FROM_HOST_CELL		15	0.684778	1.6805	0.0211132	0.0800482	0.972	5961	tags=67%, list=19%, signal=82%
GO_NEGATIVE_REGULATION_OF_TELOMERE_MAINTENANCE_VIA_TELOMERE_LENGTHENING	GO_NEGATIVE_REGULATION_OF_TELOMERE_MAINTENANCE_VIA_TELOMERE_LENGTHENING		17	0.594372	1.68019	0.0327869	0.0800943	0.972	7436	tags=53%, list=23%, signal=69%
GO_REGULATION_OF_ESTABLISHMENT_OF_PLANAR_POLARITY	GO_REGULATION_OF_ESTABLISHMENT_OF_PLANAR_POLARITY		109	0.481101	1.6798	0.0237624	0.0802003	0.972	4184	tags=39%, list=13%, signal=45%
GO_NEGATIVE_REGULATION_OF_SIGNAL_TRANSDUCTION_BY_P53_CLASS_MEDIATOR	GO_NEGATIVE_REGULATION_OF_SIGNAL_TRANSDUCTION_BY_P53_CLASS_MEDIATOR		27	0.524456	1.67964	0.00970874	0.0801288	0.972	6450	tags=48%, list=20%, signal=60%
GO_LIGASE_ACTIVITY	GO_LIGASE_ACTIVITY		377	0.405499	1.67951	0.0176125	0.0800681	0.972	6171	tags=36%, list=19%, signal=44%
GO_SYNAPTONEMAL_COMPLEX_ORGANIZATION	GO_SYNAPTONEMAL_COMPLEX_ORGANIZATION		18	0.587656	1.67934	0.0140845	0.0800137	0.972	7958	tags=61%, list=25%, signal=81%
GO_REGULATION_OF_TRANSCRIPTION_ELONGATION_FROM_RNA_POLYMERASE_II_PROMOTER	GO_REGULATION_OF_TRANSCRIPTION_ELONGATION_FROM_RNA_POLYMERASE_II_PROMOTER		21	0.564898	1.67854	0.030303	0.0803702	0.972	2993	tags=33%, list=9%, signal=37%
GO_NUCLEOSOMAL_DNA_BINDING	GO_NUCLEOSOMAL_DNA_BINDING		29	0.562189	1.67648	0.0238095	0.0815471	0.973	5983	tags=52%, list=19%, signal=64%
GO_MRNA_BINDING	GO_MRNA_BINDING		143	0.409928	1.67371	0.0155945	0.0831156	0.973	4466	tags=34%, list=14%, signal=40%
GO_ENDOPLASMIC_RETICULUM_GOLGI_INTERMEDIATE_COMPARTMENT_MEMBRANE	GO_ENDOPLASMIC_RETICULUM_GOLGI_INTERMEDIATE_COMPARTMENT_MEMBRANE		59	0.503521	1.67237	0.032882	0.0837989	0.973	5635	tags=42%, list=18%, signal=51%
GO_POSITIVE_REGULATION_OF_TYPE_I_INTERFERON_PRODUCTION	GO_POSITIVE_REGULATION_OF_TYPE_I_INTERFERON_PRODUCTION		69	0.474001	1.67213	0.0250965	0.0838174	0.973	4684	tags=35%, list=15%, signal=41%
GO_MANNOSYLATION	GO_MANNOSYLATION		30	0.540818	1.67153	0.0212766	0.083994	0.973	4986	tags=43%, list=16%, signal=51%
GO_MODULATION_BY_VIRUS_OF_HOST_MORPHOLOGY_OR_PHYSIOLOGY	GO_MODULATION_BY_VIRUS_OF_HOST_MORPHOLOGY_OR_PHYSIOLOGY		37	0.48477	1.67118	0.0127505	0.0840036	0.973	5356	tags=43%, list=17%, signal=52%
GO_ORGAN_REGENERATION	GO_ORGAN_REGENERATION		82	0.408211	1.66987	0.00788955	0.0847276	0.973	2410	tags=27%, list=8%, signal=29%
GO_RIBOSOME_BINDING	GO_RIBOSOME_BINDING		43	0.497244	1.66963	0.0300601	0.0847287	0.973	4410	tags=42%, list=14%, signal=49%
GO_RAN_GTPASE_BINDING	GO_RAN_GTPASE_BINDING		31	0.596369	1.66962	0.0449898	0.0845707	0.973	5496	tags=55%, list=17%, signal=66%
GO_OXIDOREDUCTASE_ACTIVITY_ACTING_ON_THE_CH_NH_GROUP_OF_DONORS_NAD_OR_NADP_AS_ACCEPTOR	GO_OXIDOREDUCTASE_ACTIVITY_ACTING_ON_THE_CH_NH_GROUP_OF_DONORS_NAD_OR_NADP_AS_ACCEPTOR		18	0.562196	1.66955	0.0141988	0.0844772	0.974	3079	tags=39%, list=10%, signal=43%
GO_PHOSPHATASE_COMPLEX	GO_PHOSPHATASE_COMPLEX		44	0.518499	1.66931	0.0454545	0.0844751	0.974	5842	tags=52%, list=18%, signal=64%
GO_GLUCOSE_CATABOLIC_PROCESS	GO_GLUCOSE_CATABOLIC_PROCESS		26	0.598876	1.66647	0.0349076	0.0861238	0.974	3634	tags=46%, list=11%, signal=52%
GO_SNORNA_BINDING	GO_SNORNA_BINDING		25	0.639478	1.66592	0.0373444	0.0863433	0.975	6702	tags=64%, list=21%, signal=81%
GO_PYRIMIDINE_NUCLEOTIDE_BIOSYNTHETIC_PROCESS	GO_PYRIMIDINE_NUCLEOTIDE_BIOSYNTHETIC_PROCESS		29	0.563819	1.66592	0.025641	0.086181	0.975	7520	tags=55%, list=24%, signal=72%
GO_RNA_HELICASE_ACTIVITY	GO_RNA_HELICASE_ACTIVITY		67	0.484872	1.66576	0.024	0.0861374	0.975	8371	tags=51%, list=26%, signal=69%
GO_MULTICELLULAR_ORGANISM_AGING	GO_MULTICELLULAR_ORGANISM_AGING		29	0.489157	1.66517	0.0148699	0.0863906	0.975	5636	tags=45%, list=18%, signal=54%
GO_CATALYTIC_STEP_2_SPLICEOSOME	GO_CATALYTIC_STEP_2_SPLICEOSOME		84	0.515663	1.66484	0.0447154	0.0864413	0.975	5372	tags=44%, list=17%, signal=53%
GO_ER_NUCLEUS_SIGNALING_PATHWAY	GO_ER_NUCLEUS_SIGNALING_PATHWAY		31	0.605588	1.66351	0.0376984	0.0871585	0.977	2377	tags=35%, list=7%, signal=38%
GO_NUCLEAR_ENVELOPE	GO_NUCLEAR_ENVELOPE		385	0.388998	1.66295	0.0117878	0.087412	0.978	6111	tags=35%, list=19%, signal=43%
GO_SEMAPHORIN_PLEXIN_SIGNALING_PATHWAY	GO_SEMAPHORIN_PLEXIN_SIGNALING_PATHWAY		36	0.48984	1.66276	0.016632	0.0873431	0.978	4152	tags=42%, list=13%, signal=48%
GO_OOCYTE_DIFFERENTIATION	GO_OOCYTE_DIFFERENTIATION		35	0.471555	1.66226	0.00753296	0.087607	0.978	2007	tags=29%, list=6%, signal=30%
GO_MEMBRANE_BUDDING	GO_MEMBRANE_BUDDING		111	0.462667	1.66215	0.0232558	0.0875207	0.978	6427	tags=47%, list=20%, signal=59%
GO_4_IRON_4_SULFUR_CLUSTER_BINDING	GO_4_IRON_4_SULFUR_CLUSTER_BINDING		40	0.505797	1.66168	0.0289256	0.0876459	0.979	5295	tags=43%, list=17%, signal=51%
GO_NEGATIVE_REGULATION_OF_TELOMERE_MAINTENANCE	GO_NEGATIVE_REGULATION_OF_TELOMERE_MAINTENANCE		26	0.535825	1.65962	0.0437376	0.0889669	0.979	5121	tags=42%, list=16%, signal=50%
GO_CANONICAL_WNT_SIGNALING_PATHWAY	GO_CANONICAL_WNT_SIGNALING_PATHWAY		90	0.417143	1.6595	0.00833333	0.0888763	0.979	3059	tags=30%, list=10%, signal=33%
GO_NEGATIVE_REGULATION_OF_CHROMATIN_MODIFICATION	GO_NEGATIVE_REGULATION_OF_CHROMATIN_MODIFICATION		44	0.491045	1.65922	0.027451	0.0888814	0.979	5852	tags=41%, list=18%, signal=50%
GO_NUCLEAR_CYCLIN_DEPENDENT_PROTEIN_KINASE_HOLOENZYME_COMPLEX	GO_NUCLEAR_CYCLIN_DEPENDENT_PROTEIN_KINASE_HOLOENZYME_COMPLEX		15	0.62916	1.65889	0.0297619	0.0889669	0.979	5628	tags=53%, list=18%, signal=65%
GO_RESPONSE_TO_LIGHT_STIMULUS	GO_RESPONSE_TO_LIGHT_STIMULUS		262	0.346055	1.65705	0.00189394	0.0900769	0.98	6772	tags=38%, list=21%, signal=48%
GO_DNA_BINDING_BENDING	GO_DNA_BINDING_BENDING		20	0.550893	1.65703	0.022869	0.0899235	0.98	3301	tags=45%, list=10%, signal=50%
GO_REGULATION_OF_KERATINOCYTE_PROLIFERATION	GO_REGULATION_OF_KERATINOCYTE_PROLIFERATION		26	0.538357	1.65694	0.021611	0.0898356	0.981	1788	tags=35%, list=6%, signal=37%
GO_SINGLE_ORGANISM_MEMBRANE_BUDDING	GO_SINGLE_ORGANISM_MEMBRANE_BUDDING		71	0.489416	1.65669	0.0386847	0.0898236	0.981	6427	tags=48%, list=20%, signal=60%
GO_REGULATION_OF_HISTONE_H3_K4_METHYLATION	GO_REGULATION_OF_HISTONE_H3_K4_METHYLATION		24	0.530148	1.65578	0.0290135	0.0902976	0.981	3639	tags=38%, list=11%, signal=42%
GO_TRANSCRIPTION_FACTOR_COMPLEX	GO_TRANSCRIPTION_FACTOR_COMPLEX		283	0.352488	1.65503	0.00194553	0.090675	0.983	5840	tags=33%, list=18%, signal=40%
GO_SINGLE_STRANDED_RNA_BINDING	GO_SINGLE_STRANDED_RNA_BINDING		62	0.432487	1.65489	0.0237154	0.0906089	0.983	4397	tags=37%, list=14%, signal=43%
GO_REGULATION_OF_DNA_TEMPLATED_TRANSCRIPTION_ELONGATION	GO_REGULATION_OF_DNA_TEMPLATED_TRANSCRIPTION_ELONGATION		38	0.471305	1.6543	0.012474	0.0908366	0.984	2993	tags=26%, list=9%, signal=29%
GO_CELLULAR_RESPONSE_TO_GAMMA_RADIATION	GO_CELLULAR_RESPONSE_TO_GAMMA_RADIATION		19	0.576745	1.65427	0.0305499	0.0907021	0.984	5012	tags=47%, list=16%, signal=56%
GO_REGULATION_OF_TRANSCRIPTION_FROM_RNA_POLYMERASE_I_PROMOTER	GO_REGULATION_OF_TRANSCRIPTION_FROM_RNA_POLYMERASE_I_PROMOTER		23	0.540832	1.65352	0.022449	0.0910843	0.984	5651	tags=43%, list=18%, signal=53%
GO_REGULATION_OF_TELOMERASE_ACTIVITY	GO_REGULATION_OF_TELOMERASE_ACTIVITY		41	0.480855	1.65304	0.013834	0.0912521	0.984	2007	tags=24%, list=6%, signal=26%
GO_POSITIVE_REGULATION_OF_CANONICAL_WNT_SIGNALING_PATHWAY	GO_POSITIVE_REGULATION_OF_CANONICAL_WNT_SIGNALING_PATHWAY		115	0.440055	1.65239	0.0235756	0.0915361	0.984	5657	tags=41%, list=18%, signal=50%
GO_MULTICELLULAR_ORGANISM_GROWTH	GO_MULTICELLULAR_ORGANISM_GROWTH		74	0.409701	1.65179	0.0154143	0.091645	0.984	4294	tags=27%, list=14%, signal=31%
GO_HISTONE_UBIQUITINATION	GO_HISTONE_UBIQUITINATION		34	0.563454	1.65081	0.0416667	0.092178	0.984	7062	tags=50%, list=22%, signal=64%
GO_REGULATION_OF_CELLULAR_AMIDE_METABOLIC_PROCESS	GO_REGULATION_OF_CELLULAR_AMIDE_METABOLIC_PROCESS		319	0.380705	1.64991	0.0155945	0.0927129	0.984	5684	tags=34%, list=18%, signal=41%
GO_KERATINIZATION	GO_KERATINIZATION		30	0.651105	1.64981	0.012605	0.0926124	0.984	6911	tags=70%, list=22%, signal=89%
GO_PYRIMIDINE_NUCLEOSIDE_METABOLIC_PROCESS	GO_PYRIMIDINE_NUCLEOSIDE_METABOLIC_PROCESS		46	0.487164	1.64946	0.023301	0.0927005	0.984	5610	tags=37%, list=18%, signal=45%
GO_PREASSEMBLY_OF_GPI_ANCHOR_IN_ER_MEMBRANE	GO_PREASSEMBLY_OF_GPI_ANCHOR_IN_ER_MEMBRANE		15	0.638124	1.64946	0.0252427	0.0925395	0.984	4650	tags=47%, list=15%, signal=55%
GO_REGULATION_OF_EXOSOMAL_SECRETION	GO_REGULATION_OF_EXOSOMAL_SECRETION		17	0.640959	1.64643	0.0216963	0.0943993	0.984	6210	tags=59%, list=20%, signal=73%
GO_POSITIVE_REGULATION_OF_VIRAL_PROCESS	GO_POSITIVE_REGULATION_OF_VIRAL_PROCESS		85	0.453126	1.64601	0.0159046	0.0945183	0.984	5961	tags=39%, list=19%, signal=48%
GO_VENTRICULAR_SYSTEM_DEVELOPMENT	GO_VENTRICULAR_SYSTEM_DEVELOPMENT		26	0.52913	1.64544	0.0283401	0.0947364	0.984	4570	tags=46%, list=14%, signal=54%
GO_PROTEIN_HETERODIMERIZATION_ACTIVITY	GO_PROTEIN_HETERODIMERIZATION_ACTIVITY		423	0.356792	1.64535	0.00375235	0.0946529	0.984	5785	tags=34%, list=18%, signal=41%
GO_PROTEIN_PHOSPHATASE_TYPE_2A_COMPLEX	GO_PROTEIN_PHOSPHATASE_TYPE_2A_COMPLEX		19	0.589097	1.64522	0.0331384	0.0945646	0.984	5842	tags=63%, list=18%, signal=77%
GO_ESTABLISHMENT_OR_MAINTENANCE_OF_EPITHELIAL_CELL_APICAL_BASAL_POLARITY	GO_ESTABLISHMENT_OR_MAINTENANCE_OF_EPITHELIAL_CELL_APICAL_BASAL_POLARITY		27	0.486124	1.64473	0.0194932	0.0947689	0.984	4182	tags=44%, list=13%, signal=51%
GO_HYDROLASE_ACTIVITY_HYDROLYZING_N_GLYCOSYL_COMPOUNDS	GO_HYDROLASE_ACTIVITY_HYDROLYZING_N_GLYCOSYL_COMPOUNDS		22	0.517607	1.64463	0.022869	0.0946629	0.984	630	tags=18%, list=2%, signal=19%
GO_TRNA_METHYLATION	GO_TRNA_METHYLATION		20	0.581152	1.64391	0.044898	0.0949623	0.984	7270	tags=60%, list=23%, signal=78%
GO_PROTEASOME_BINDING	GO_PROTEASOME_BINDING		16	0.622721	1.64302	0.0313725	0.095448	0.984	9232	tags=69%, list=29%, signal=97%
GO_SIGNAL_SEQUENCE_BINDING	GO_SIGNAL_SEQUENCE_BINDING		37	0.529236	1.64281	0.0383877	0.0954213	0.984	3688	tags=35%, list=12%, signal=40%
GO_EMBRYONIC_CRANIAL_SKELETON_MORPHOGENESIS	GO_EMBRYONIC_CRANIAL_SKELETON_MORPHOGENESIS		46	0.48759	1.64084	0.027833	0.0967171	0.984	5192	tags=37%, list=16%, signal=44%
GO_PROTEIN_N_TERMINUS_BINDING	GO_PROTEIN_N_TERMINUS_BINDING		101	0.407525	1.6408	0.00976562	0.0965724	0.984	6772	tags=41%, list=21%, signal=51%
GO_MAINTENANCE_OF_LOCATION_IN_CELL	GO_MAINTENANCE_OF_LOCATION_IN_CELL		93	0.422743	1.63992	0.00828157	0.0969469	0.984	6097	tags=37%, list=19%, signal=45%
GO_PTERIDINE_CONTAINING_COMPOUND_BIOSYNTHETIC_PROCESS	GO_PTERIDINE_CONTAINING_COMPOUND_BIOSYNTHETIC_PROCESS		17	0.63814	1.63896	0.0291829	0.0974738	0.984	3306	tags=47%, list=10%, signal=52%
GO_CYTOPLASMIC_SEQUESTERING_OF_PROTEIN	GO_CYTOPLASMIC_SEQUESTERING_OF_PROTEIN		40	0.490333	1.63871	0.0209644	0.0974888	0.985	4599	tags=38%, list=14%, signal=44%
GO_REPRODUCTIVE_SYSTEM_DEVELOPMENT	GO_REPRODUCTIVE_SYSTEM_DEVELOPMENT		388	0.352759	1.63775	<0.0001	0.0980486	0.985	5493	tags=31%, list=17%, signal=37%
GO_REGULATION_OF_TELOMERE_CAPPING	GO_REGULATION_OF_TELOMERE_CAPPING		21	0.572151	1.63749	0.0252427	0.0980568	0.985	3743	tags=33%, list=12%, signal=38%
GO_MICROTUBULE_BASED_MOVEMENT	GO_MICROTUBULE_BASED_MOVEMENT		192	0.417559	1.637	0.00992064	0.0982395	0.985	3703	tags=23%, list=12%, signal=26%
GO_DEOXYRIBONUCLEOTIDE_METABOLIC_PROCESS	GO_DEOXYRIBONUCLEOTIDE_METABOLIC_PROCESS		33	0.554694	1.636	0.0443548	0.0988106	0.985	3549	tags=33%, list=11%, signal=37%
GO_CELLULAR_RESPONSE_TO_EPIDERMAL_GROWTH_FACTOR_STIMULUS	GO_CELLULAR_RESPONSE_TO_EPIDERMAL_GROWTH_FACTOR_STIMULUS		23	0.527117	1.63589	0.0216535	0.098725	0.985	3974	tags=48%, list=13%, signal=55%
GO_CORNIFIED_ENVELOPE	GO_CORNIFIED_ENVELOPE		24	0.707325	1.63545	0.026971	0.09885	0.985	6911	tags=75%, list=22%, signal=96%
GO_RNA_DEPENDENT_DNA_BIOSYNTHETIC_PROCESS	GO_RNA_DEPENDENT_DNA_BIOSYNTHETIC_PROCESS		20	0.555163	1.63544	0.0383065	0.0986868	0.985	5818	tags=55%, list=18%, signal=67%
GO_ANCHORING_JUNCTION	GO_ANCHORING_JUNCTION		474	0.407609	1.63521	0.0336634	0.0987048	0.985	4063	tags=32%, list=13%, signal=36%
GO_PYRIMIDINE_CONTAINING_COMPOUND_METABOLIC_PROCESS	GO_PYRIMIDINE_CONTAINING_COMPOUND_METABOLIC_PROCESS		72	0.424261	1.63324	0.0151803	0.0999729	0.985	4530	tags=28%, list=14%, signal=32%
GO_EPITHELIAL_TUBE_BRANCHING_INVOLVED_IN_LUNG_MORPHOGENESIS	GO_EPITHELIAL_TUBE_BRANCHING_INVOLVED_IN_LUNG_MORPHOGENESIS		25	0.526736	1.63306	0.0255906	0.0999294	0.985	2794	tags=36%, list=9%, signal=39%
GO_PIGMENT_GRANULE	GO_PIGMENT_GRANULE		101	0.474114	1.63245	0.0318091	0.100213	0.985	3543	tags=39%, list=11%, signal=43%
GO_WIDE_PORE_CHANNEL_ACTIVITY	GO_WIDE_PORE_CHANNEL_ACTIVITY		20	0.552631	1.63153	0.0378486	0.100679	0.985	2395	tags=35%, list=8%, signal=38%
GO_PROTEIN_SERINE_THREONINE_KINASE_ACTIVITY	GO_PROTEIN_SERINE_THREONINE_KINASE_ACTIVITY		424	0.362924	1.63143	0.0211538	0.100572	0.985	4247	tags=24%, list=13%, signal=27%
GO_NEUROPILIN_BINDING	GO_NEUROPILIN_BINDING		15	0.561107	1.63045	0.0222672	0.101081	0.985	4152	tags=53%, list=13%, signal=61%
GO_BINDING_OF_SPERM_TO_ZONA_PELLUCIDA	GO_BINDING_OF_SPERM_TO_ZONA_PELLUCIDA		30	0.492586	1.63004	0.0255403	0.10122	0.985	3046	tags=33%, list=10%, signal=37%
GO_UBIQUITIN_LIKE_PROTEIN_LIGASE_ACTIVITY	GO_UBIQUITIN_LIKE_PROTEIN_LIGASE_ACTIVITY		190	0.41122	1.62848	0.0434783	0.102152	0.986	6419	tags=38%, list=20%, signal=48%
GO_NUCLEAR_EUCHROMATIN	GO_NUCLEAR_EUCHROMATIN		22	0.516648	1.62718	0.0364683	0.102892	0.986	2007	tags=27%, list=6%, signal=29%
GO_POSITIVE_REGULATION_OF_NIK_NF_KAPPAB_SIGNALING	GO_POSITIVE_REGULATION_OF_NIK_NF_KAPPAB_SIGNALING		29	0.517633	1.62666	0.0211132	0.10314	0.986	6074	tags=48%, list=19%, signal=60%
GO_POSITIVE_REGULATION_OF_CELL_CYCLE_G1_S_PHASE_TRANSITION	GO_POSITIVE_REGULATION_OF_CELL_CYCLE_G1_S_PHASE_TRANSITION		28	0.53626	1.62663	0.0198807	0.102991	0.986	3166	tags=32%, list=10%, signal=36%
GO_PROTEIN_AUTOUBIQUITINATION	GO_PROTEIN_AUTOUBIQUITINATION		48	0.464616	1.62656	0.0396226	0.102867	0.986	4680	tags=27%, list=15%, signal=32%
GO_DNA_N_GLYCOSYLASE_ACTIVITY	GO_DNA_N_GLYCOSYLASE_ACTIVITY		15	0.641116	1.62639	0.0306748	0.102836	0.986	630	tags=27%, list=2%, signal=27%
GO_REGULATION_OF_KERATINOCYTE_DIFFERENTIATION	GO_REGULATION_OF_KERATINOCYTE_DIFFERENTIATION		26	0.49663	1.62495	0.0189394	0.103699	0.986	5430	tags=38%, list=17%, signal=46%
GO_NOSE_DEVELOPMENT	GO_NOSE_DEVELOPMENT		15	0.576959	1.6249	0.0248566	0.103573	0.986	3060	tags=33%, list=10%, signal=37%
GO_METHYL_CPG_BINDING	GO_METHYL_CPG_BINDING		16	0.567505	1.62395	0.0310559	0.103896	0.986	6115	tags=50%, list=19%, signal=62%
GO_RESPONSE_TO_DSRNA	GO_RESPONSE_TO_DSRNA		52	0.456696	1.62325	0.0250482	0.104299	0.989	6146	tags=42%, list=19%, signal=52%
GO_REGULATION_OF_ESTABLISHMENT_OF_PROTEIN_LOCALIZATION_TO_MITOCHONDRION	GO_REGULATION_OF_ESTABLISHMENT_OF_PROTEIN_LOCALIZATION_TO_MITOCHONDRION		121	0.385923	1.62307	0.0179283	0.104274	0.989	7285	tags=41%, list=23%, signal=53%
GO_BETA_CATENIN_DESTRUCTION_COMPLEX_DISASSEMBLY	GO_BETA_CATENIN_DESTRUCTION_COMPLEX_DISASSEMBLY		20	0.528922	1.6224	0.0346232	0.104582	0.989	2531	tags=35%, list=8%, signal=38%
GO_EXON_EXON_JUNCTION_COMPLEX	GO_EXON_EXON_JUNCTION_COMPLEX		20	0.519374	1.62165	0.0382294	0.104998	0.989	6478	tags=50%, list=20%, signal=63%
GO_TRANSCRIPTION_COACTIVATOR_ACTIVITY	GO_TRANSCRIPTION_COACTIVATOR_ACTIVITY		289	0.355802	1.62114	0.0154739	0.105179	0.989	6037	tags=33%, list=19%, signal=40%
GO_PROTEIN_ACETYLATION	GO_PROTEIN_ACETYLATION		112	0.401679	1.62096	0.0198807	0.105152	0.989	5625	tags=34%, list=18%, signal=41%
GO_O_GLYCAN_PROCESSING	GO_O_GLYCAN_PROCESSING		56	0.491683	1.62018	0.0354331	0.105551	0.989	6472	tags=46%, list=20%, signal=58%
GO_ACETYLTRANSFERASE_ACTIVITY	GO_ACETYLTRANSFERASE_ACTIVITY		91	0.419647	1.61985	0.0239521	0.105498	0.989	5625	tags=35%, list=18%, signal=43%
GO_TELOMERE_MAINTENANCE_VIA_TELOMERASE	GO_TELOMERE_MAINTENANCE_VIA_TELOMERASE		16	0.588708	1.61909	0.0346939	0.10589	0.989	5818	tags=56%, list=18%, signal=69%
GO_PYRIMIDINE_NUCLEOSIDE_TRIPHOSPHATE_METABOLIC_PROCESS	GO_PYRIMIDINE_NUCLEOSIDE_TRIPHOSPHATE_METABOLIC_PROCESS		20	0.586771	1.61777	0.045977	0.106669	0.989	6481	tags=55%, list=20%, signal=69%
GO_ADHERENS_JUNCTION_ORGANIZATION	GO_ADHERENS_JUNCTION_ORGANIZATION		64	0.449571	1.61776	0.030303	0.106506	0.989	2722	tags=33%, list=9%, signal=36%
GO_ESTABLISHMENT_OF_MITOTIC_SPINDLE_ORIENTATION	GO_ESTABLISHMENT_OF_MITOTIC_SPINDLE_ORIENTATION		19	0.564443	1.61711	0.0211132	0.106859	0.989	1364	tags=32%, list=4%, signal=33%
GO_ESTABLISHMENT_OF_EPITHELIAL_CELL_POLARITY	GO_ESTABLISHMENT_OF_EPITHELIAL_CELL_POLARITY		22	0.527833	1.61708	0.0219561	0.106705	0.989	5943	tags=50%, list=19%, signal=61%
GO_RESPONSE_TO_GONADOTROPIN	GO_RESPONSE_TO_GONADOTROPIN		26	0.483197	1.61568	0.0176817	0.107429	0.989	4765	tags=42%, list=15%, signal=50%
GO_TRANSLATION_INITIATION_FACTOR_BINDING	GO_TRANSLATION_INITIATION_FACTOR_BINDING		25	0.563317	1.61551	0.0436508	0.107366	0.989	3097	tags=44%, list=10%, signal=49%
GO_MORPHOGENESIS_OF_AN_EPITHELIAL_SHEET	GO_MORPHOGENESIS_OF_AN_EPITHELIAL_SHEET		40	0.497154	1.61416	0.0302419	0.108264	0.989	6953	tags=52%, list=22%, signal=67%
GO_ENDOPLASMIC_RETICULUM_GOLGI_INTERMEDIATE_COMPARTMENT	GO_ENDOPLASMIC_RETICULUM_GOLGI_INTERMEDIATE_COMPARTMENT		98	0.449033	1.61333	0.0464217	0.108765	0.989	5943	tags=44%, list=19%, signal=54%
GO_PEPTIDYL_SERINE_MODIFICATION	GO_PEPTIDYL_SERINE_MODIFICATION		145	0.398998	1.61161	0.0194553	0.109697	0.99	4114	tags=28%, list=13%, signal=32%
GO_REGULATION_OF_WATER_LOSS_VIA_SKIN	GO_REGULATION_OF_WATER_LOSS_VIA_SKIN		18	0.562681	1.61139	0.0387755	0.109638	0.99	4933	tags=50%, list=16%, signal=59%
GO_HEPATICOBILIARY_SYSTEM_DEVELOPMENT	GO_HEPATICOBILIARY_SYSTEM_DEVELOPMENT		125	0.372608	1.61085	0.0117417	0.109701	0.99	2989	tags=24%, list=9%, signal=26%
GO_TRANSFERASE_ACTIVITY_TRANSFERRING_HEXOSYL_GROUPS	GO_TRANSFERASE_ACTIVITY_TRANSFERRING_HEXOSYL_GROUPS		184	0.400239	1.61006	0.0114723	0.110183	0.991	5671	tags=35%, list=18%, signal=42%
GO_MICROTUBULE_NUCLEATION	GO_MICROTUBULE_NUCLEATION		18	0.53438	1.60986	0.0373134	0.110144	0.991	8322	tags=56%, list=26%, signal=75%
GO_PYRIMIDINE_NUCLEOTIDE_METABOLIC_PROCESS	GO_PYRIMIDINE_NUCLEOTIDE_METABOLIC_PROCESS		44	0.489694	1.60942	0.0387597	0.110335	0.991	6929	tags=43%, list=22%, signal=55%
GO_MODIFICATION_BY_SYMBIONT_OF_HOST_MORPHOLOGY_OR_PHYSIOLOGY	GO_MODIFICATION_BY_SYMBIONT_OF_HOST_MORPHOLOGY_OR_PHYSIOLOGY		45	0.451734	1.60885	0.0204842	0.110632	0.992	5356	tags=40%, list=17%, signal=48%
GO_OOGENESIS	GO_OOGENESIS		60	0.399217	1.60867	0.00193798	0.110594	0.992	2886	tags=23%, list=9%, signal=26%
GO_NEGATIVE_REGULATION_OF_TRANSFERASE_ACTIVITY	GO_NEGATIVE_REGULATION_OF_TRANSFERASE_ACTIVITY		342	0.35059	1.60836	0.0132325	0.110666	0.992	5740	tags=33%, list=18%, signal=40%
GO__DE_NOVO_PROTEIN_FOLDING	GO__DE_NOVO_PROTEIN_FOLDING		17	0.641112	1.60814	0.0462777	0.110667	0.992	5440	tags=65%, list=17%, signal=78%
GO_REGENERATION	GO_REGENERATION		153	0.368563	1.60799	0.00589391	0.110611	0.992	2410	tags=22%, list=8%, signal=24%
GO_ACTIVATION_OF_NF_KAPPAB_INDUCING_KINASE_ACTIVITY	GO_ACTIVATION_OF_NF_KAPPAB_INDUCING_KINASE_ACTIVITY		17	0.566718	1.60781	0.0320151	0.110575	0.992	7409	tags=53%, list=23%, signal=69%
GO_REGULATION_OF_CHROMATIN_ORGANIZATION	GO_REGULATION_OF_CHROMATIN_ORGANIZATION		145	0.380621	1.60686	0.015534	0.110911	0.992	5979	tags=32%, list=19%, signal=40%
GO_MALE_GAMETE_GENERATION	GO_MALE_GAMETE_GENERATION		380	0.319904	1.60639	0.00383877	0.110956	0.992	5837	tags=27%, list=18%, signal=33%
GO_BETA_1_3_GALACTOSYLTRANSFERASE_ACTIVITY	GO_BETA_1_3_GALACTOSYLTRANSFERASE_ACTIVITY		15	0.618033	1.60494	0.0364683	0.111868	0.992	6185	tags=60%, list=19%, signal=74%
GO_UBIQUITIN_LIKE_PROTEIN_BINDING	GO_UBIQUITIN_LIKE_PROTEIN_BINDING		116	0.433854	1.60212	0.0399202	0.113885	0.992	7281	tags=45%, list=23%, signal=58%
GO_KERATIN_FILAMENT	GO_KERATIN_FILAMENT		39	0.53227	1.60199	0.0420842	0.113823	0.992	4953	tags=49%, list=16%, signal=58%
GO_NEGATIVE_REGULATION_OF_HISTONE_MODIFICATION	GO_NEGATIVE_REGULATION_OF_HISTONE_MODIFICATION		35	0.484232	1.60156	0.0271845	0.113993	0.992	5852	tags=46%, list=18%, signal=56%
GO_HISTONE_H2A_ACETYLATION	GO_HISTONE_H2A_ACETYLATION		15	0.572911	1.60155	0.0495238	0.113817	0.992	4736	tags=47%, list=15%, signal=55%
GO_ASYMMETRIC_PROTEIN_LOCALIZATION	GO_ASYMMETRIC_PROTEIN_LOCALIZATION		18	0.540143	1.60016	0.0382409	0.114641	0.992	3009	tags=44%, list=9%, signal=49%
GO_POLY_PYRIMIDINE_TRACT_BINDING	GO_POLY_PYRIMIDINE_TRACT_BINDING		17	0.550938	1.59962	0.0355649	0.114855	0.992	3860	tags=53%, list=12%, signal=60%
GO_RNA_SPLICING_VIA_ENDONUCLEOLYTIC_CLEAVAGE_AND_LIGATION	GO_RNA_SPLICING_VIA_ENDONUCLEOLYTIC_CLEAVAGE_AND_LIGATION		15	0.609369	1.59861	0.0420168	0.115459	0.992	2735	tags=33%, list=9%, signal=36%
GO_GLUCOSYLTRANSFERASE_ACTIVITY	GO_GLUCOSYLTRANSFERASE_ACTIVITY		16	0.583149	1.59844	0.0457143	0.11542	0.992	3233	tags=44%, list=10%, signal=49%
GO_GLAND_DEVELOPMENT	GO_GLAND_DEVELOPMENT		379	0.336252	1.59801	0.00191939	0.115569	0.992	5121	tags=29%, list=16%, signal=34%
GO_REGULATION_OF_VIRAL_RELEASE_FROM_HOST_CELL	GO_REGULATION_OF_VIRAL_RELEASE_FROM_HOST_CELL		31	0.551031	1.59745	0.0436508	0.115826	0.992	5961	tags=45%, list=19%, signal=56%
GO_REGULATION_OF_MAMMARY_GLAND_EPITHELIAL_CELL_PROLIFERATION	GO_REGULATION_OF_MAMMARY_GLAND_EPITHELIAL_CELL_PROLIFERATION		16	0.571635	1.59688	0.0455487	0.116157	0.993	9488	tags=69%, list=30%, signal=98%
GO_RESPONSE_TO_EPIDERMAL_GROWTH_FACTOR	GO_RESPONSE_TO_EPIDERMAL_GROWTH_FACTOR		28	0.495286	1.59548	0.028626	0.11709	0.993	6891	tags=57%, list=22%, signal=73%
GO_REGULATION_OF_HISTONE_METHYLATION	GO_REGULATION_OF_HISTONE_METHYLATION		50	0.460717	1.59534	0.0460653	0.117016	0.993	8667	tags=58%, list=27%, signal=80%
GO_UBIQUITIN_LIGASE_COMPLEX	GO_UBIQUITIN_LIGASE_COMPLEX		252	0.370257	1.59509	0.0438931	0.117016	0.994	6660	tags=35%, list=21%, signal=43%
GO_NOTCH_RECEPTOR_PROCESSING	GO_NOTCH_RECEPTOR_PROCESSING		16	0.577817	1.59477	0.0409836	0.117124	0.994	4235	tags=50%, list=13%, signal=58%
GO_NEGATIVE_REGULATION_OF_PROTEIN_LOCALIZATION_TO_CELL_PERIPHERY	GO_NEGATIVE_REGULATION_OF_PROTEIN_LOCALIZATION_TO_CELL_PERIPHERY		20	0.548793	1.59449	0.0383838	0.117137	0.994	3864	tags=40%, list=12%, signal=46%
GO_SPLICEOSOMAL_COMPLEX	GO_SPLICEOSOMAL_COMPLEX		161	0.440124	1.59395	0.0468432	0.117435	0.994	5440	tags=38%, list=17%, signal=45%
GO_PURINE_NUCLEOBASE_METABOLIC_PROCESS	GO_PURINE_NUCLEOBASE_METABOLIC_PROCESS		20	0.541225	1.59378	0.0255403	0.117388	0.994	4796	tags=45%, list=15%, signal=53%
GO_MISFOLDED_OR_INCOMPLETELY_SYNTHESIZED_PROTEIN_CATABOLIC_PROCESS	GO_MISFOLDED_OR_INCOMPLETELY_SYNTHESIZED_PROTEIN_CATABOLIC_PROCESS		16	0.552624	1.59287	0.0402414	0.117397	0.994	6953	tags=38%, list=22%, signal=48%
GO_MODULATION_BY_SYMBIONT_OF_HOST_CELLULAR_PROCESS	GO_MODULATION_BY_SYMBIONT_OF_HOST_CELLULAR_PROCESS		28	0.492372	1.59196	0.0471869	0.118005	0.994	5356	tags=46%, list=17%, signal=56%
GO_LIGAND_DEPENDENT_NUCLEAR_RECEPTOR_TRANSCRIPTION_COACTIVATOR_ACTIVITY	GO_LIGAND_DEPENDENT_NUCLEAR_RECEPTOR_TRANSCRIPTION_COACTIVATOR_ACTIVITY		51	0.416583	1.59188	0.0311284	0.117891	0.994	6630	tags=49%, list=21%, signal=62%
GO_NUCLEOSIDE_DIPHOSPHATE_METABOLIC_PROCESS	GO_NUCLEOSIDE_DIPHOSPHATE_METABOLIC_PROCESS		78	0.430329	1.59073	0.0348837	0.118609	0.994	7574	tags=50%, list=24%, signal=65%
GO_RNA_STABILIZATION	GO_RNA_STABILIZATION		29	0.469807	1.59061	0.0413386	0.118507	0.994	3901	tags=34%, list=12%, signal=39%
GO_POSITIVE_REGULATION_OF_VIRAL_GENOME_REPLICATION	GO_POSITIVE_REGULATION_OF_VIRAL_GENOME_REPLICATION		29	0.510371	1.58977	0.0469667	0.1191	0.994	5131	tags=48%, list=16%, signal=58%
GO_CRANIAL_SKELETAL_SYSTEM_DEVELOPMENT	GO_CRANIAL_SKELETAL_SYSTEM_DEVELOPMENT		54	0.465937	1.58897	0.034413	0.119611	0.995	5192	tags=35%, list=16%, signal=42%
GO_REGULATION_OF_DNA_METHYLATION	GO_REGULATION_OF_DNA_METHYLATION		15	0.571753	1.5885	0.0298805	0.119812	0.995	2377	tags=40%, list=7%, signal=43%
GO_UBIQUITIN_LIKE_PROTEIN_CONJUGATING_ENZYME_ACTIVITY	GO_UBIQUITIN_LIKE_PROTEIN_CONJUGATING_ENZYME_ACTIVITY		29	0.544989	1.58797	0.0470588	0.120033	0.995	6912	tags=52%, list=22%, signal=66%
GO_GLUCOSE_6_PHOSPHATE_METABOLIC_PROCESS	GO_GLUCOSE_6_PHOSPHATE_METABOLIC_PROCESS		21	0.56016	1.58754	0.0358566	0.120152	0.995	3292	tags=43%, list=10%, signal=48%
GO_REGULATION_OF_EPIDERMIS_DEVELOPMENT	GO_REGULATION_OF_EPIDERMIS_DEVELOPMENT		60	0.425081	1.58603	0.0196078	0.121259	0.995	5684	tags=37%, list=18%, signal=45%
GO_NUCLEOTIDE_EXCISION_REPAIR_PREINCISION_COMPLEX_ASSEMBLY	GO_NUCLEOTIDE_EXCISION_REPAIR_PREINCISION_COMPLEX_ASSEMBLY		29	0.517005	1.58493	0.0445344	0.121928	0.995	6621	tags=52%, list=21%, signal=65%
GO_NUCLEAR_MEMBRANE	GO_NUCLEAR_MEMBRANE		256	0.371026	1.58429	0.023622	0.122286	0.995	3742	tags=25%, list=12%, signal=28%
GO_PRE_MRNA_BINDING	GO_PRE_MRNA_BINDING		24	0.518436	1.58396	0.039604	0.122214	0.995	6891	tags=50%, list=22%, signal=64%
GO_GLYCOPROTEIN_CATABOLIC_PROCESS	GO_GLYCOPROTEIN_CATABOLIC_PROCESS		15	0.560718	1.58239	0.0331384	0.12288	0.995	3493	tags=40%, list=11%, signal=45%
GO_DNA_LIGATION	GO_DNA_LIGATION		16	0.606452	1.58162	0.0473251	0.123175	0.995	8425	tags=75%, list=27%, signal=102%
GO_PROTEIN_COMPLEX_LOCALIZATION	GO_PROTEIN_COMPLEX_LOCALIZATION		51	0.449279	1.58082	0.0270793	0.123664	0.995	4293	tags=31%, list=14%, signal=36%
GO_NOTOCHORD_DEVELOPMENT	GO_NOTOCHORD_DEVELOPMENT		17	0.548493	1.58063	0.0451866	0.123602	0.995	6979	tags=59%, list=22%, signal=75%
GO_POSITIVE_REGULATION_OF_CHROMATIN_MODIFICATION	GO_POSITIVE_REGULATION_OF_CHROMATIN_MODIFICATION		80	0.387543	1.58047	0.0162602	0.123375	0.995	2316	tags=23%, list=7%, signal=24%
GO_ENDOPLASMIC_RETICULUM_SUBCOMPARTMENT	GO_ENDOPLASMIC_RETICULUM_SUBCOMPARTMENT		15	0.580458	1.57909	0.040856	0.124103	0.995	449	tags=20%, list=1%, signal=20%
GO_MULTIVESICULAR_BODY_ORGANIZATION	GO_MULTIVESICULAR_BODY_ORGANIZATION		30	0.564316	1.57904	0.0492126	0.123968	0.995	6251	tags=53%, list=20%, signal=66%
GO_NEGATIVE_REGULATION_OF_INTRINSIC_APOPTOTIC_SIGNALING_PATHWAY_BY_P53_CLASS_MEDIATOR	GO_NEGATIVE_REGULATION_OF_INTRINSIC_APOPTOTIC_SIGNALING_PATHWAY_BY_P53_CLASS_MEDIATOR		18	0.512655	1.57871	0.034	0.124073	0.995	2838	tags=33%, list=9%, signal=37%
GO_REGULATION_OF_INTRINSIC_APOPTOTIC_SIGNALING_PATHWAY_BY_P53_CLASS_MEDIATOR	GO_REGULATION_OF_INTRINSIC_APOPTOTIC_SIGNALING_PATHWAY_BY_P53_CLASS_MEDIATOR		22	0.494778	1.57832	0.0337302	0.124252	0.995	2838	tags=32%, list=9%, signal=35%
GO_CELL_SUBSTRATE_JUNCTION	GO_CELL_SUBSTRATE_JUNCTION		388	0.414721	1.57826	0.0499002	0.124132	0.995	4044	tags=31%, list=13%, signal=35%
GO_MACROMOLECULE_METHYLATION	GO_MACROMOLECULE_METHYLATION		171	0.384994	1.57649	0.0248963	0.125424	0.995	7270	tags=39%, list=23%, signal=50%
GO_GAMETE_GENERATION	GO_GAMETE_GENERATION		476	0.312782	1.57015	0.00380228	0.129493	0.995	5837	tags=27%, list=18%, signal=32%
GO_NEGATIVE_REGULATION_OF_CELLULAR_AMIDE_METABOLIC_PROCESS	GO_NEGATIVE_REGULATION_OF_CELLULAR_AMIDE_METABOLIC_PROCESS		118	0.381959	1.56889	0.0291262	0.130364	0.995	5426	tags=37%, list=17%, signal=45%
GO_REGULATION_OF_NIK_NF_KAPPAB_SIGNALING	GO_REGULATION_OF_NIK_NF_KAPPAB_SIGNALING		41	0.475066	1.56885	0.0411765	0.130229	0.995	6074	tags=46%, list=19%, signal=57%
GO_CELLULAR_CARBOHYDRATE_CATABOLIC_PROCESS	GO_CELLULAR_CARBOHYDRATE_CATABOLIC_PROCESS		31	0.506902	1.56856	0.0195312	0.130258	0.995	3812	tags=32%, list=12%, signal=37%
GO_REGULATION_OF_ORGANELLE_ASSEMBLY	GO_REGULATION_OF_ORGANELLE_ASSEMBLY		139	0.387364	1.56765	0.0350195	0.130479	0.995	6164	tags=37%, list=19%, signal=45%
GO_PYRIMIDINE_NUCLEOSIDE_TRIPHOSPHATE_BIOSYNTHETIC_PROCESS	GO_PYRIMIDINE_NUCLEOSIDE_TRIPHOSPHATE_BIOSYNTHETIC_PROCESS		18	0.589225	1.56724	0.0490196	0.130625	0.995	6481	tags=56%, list=20%, signal=70%
GO_NEGATIVE_REGULATION_OF_CELLULAR_CATABOLIC_PROCESS	GO_NEGATIVE_REGULATION_OF_CELLULAR_CATABOLIC_PROCESS		148	0.362102	1.56485	0.0318725	0.132347	0.995	5518	tags=30%, list=17%, signal=37%
GO_MALE_MEIOSIS	GO_MALE_MEIOSIS		31	0.46288	1.56432	0.0440613	0.1326	0.995	406	tags=16%, list=1%, signal=16%
GO_LIVER_REGENERATION	GO_LIVER_REGENERATION		19	0.482149	1.56376	0.0248092	0.132889	0.995	1316	tags=26%, list=4%, signal=27%
GO_TRANSCRIPTION_INITIATION_FROM_RNA_POLYMERASE_II_PROMOTER	GO_TRANSCRIPTION_INITIATION_FROM_RNA_POLYMERASE_II_PROMOTER		151	0.344322	1.56316	0.0239044	0.133216	0.995	5734	tags=32%, list=18%, signal=39%
GO_NEGATIVE_REGULATION_OF_DNA_RECOMBINATION	GO_NEGATIVE_REGULATION_OF_DNA_RECOMBINATION		15	0.583442	1.56247	0.0464217	0.133251	0.995	1015	tags=27%, list=3%, signal=28%
GO_ISOMERASE_ACTIVITY	GO_ISOMERASE_ACTIVITY		141	0.397638	1.56179	0.0374753	0.13348	0.996	6936	tags=34%, list=22%, signal=43%
GO_REGULATION_OF_CELLULAR_KETONE_METABOLIC_PROCESS	GO_REGULATION_OF_CELLULAR_KETONE_METABOLIC_PROCESS		167	0.391083	1.56102	0.0367505	0.133954	0.996	5774	tags=35%, list=18%, signal=42%
GO_POSITIVE_REGULATION_OF_TELOMERE_CAPPING	GO_POSITIVE_REGULATION_OF_TELOMERE_CAPPING		15	0.569421	1.56048	0.0414201	0.134054	0.996	7436	tags=53%, list=23%, signal=70%
GO_OVARIAN_FOLLICLE_DEVELOPMENT	GO_OVARIAN_FOLLICLE_DEVELOPMENT		55	0.388171	1.55994	0.0173077	0.134352	0.996	5411	tags=38%, list=17%, signal=46%
GO_NUCLEAR_INNER_MEMBRANE	GO_NUCLEAR_INNER_MEMBRANE		46	0.435633	1.55988	0.011583	0.134235	0.996	2592	tags=24%, list=8%, signal=26%
GO_GLAND_MORPHOGENESIS	GO_GLAND_MORPHOGENESIS		95	0.397775	1.55945	0.015873	0.134401	0.996	5840	tags=41%, list=18%, signal=50%
GO_NCRNA_CATABOLIC_PROCESS	GO_NCRNA_CATABOLIC_PROCESS		21	0.523188	1.55906	0.0447154	0.134557	0.996	5137	tags=48%, list=16%, signal=57%
GO_PROTEIN_PHOSPHATASE_BINDING	GO_PROTEIN_PHOSPHATASE_BINDING		117	0.392435	1.55893	0.0332681	0.134481	0.996	6672	tags=44%, list=21%, signal=55%
GO_REGULATION_OF_DNA_DAMAGE_RESPONSE_SIGNAL_TRANSDUCTION_BY_P53_CLASS_MEDIATOR	GO_REGULATION_OF_DNA_DAMAGE_RESPONSE_SIGNAL_TRANSDUCTION_BY_P53_CLASS_MEDIATOR		27	0.519909	1.55831	0.036965	0.134811	0.996	2838	tags=37%, list=9%, signal=41%
GO_REGULATION_OF_MEIOTIC_NUCLEAR_DIVISION	GO_REGULATION_OF_MEIOTIC_NUCLEAR_DIVISION		26	0.474409	1.55815	0.0334646	0.134761	0.996	4243	tags=35%, list=13%, signal=40%
GO_TRANSCRIPTIONAL_REPRESSOR_COMPLEX	GO_TRANSCRIPTIONAL_REPRESSOR_COMPLEX		73	0.394683	1.55783	0.0449219	0.134476	0.996	5885	tags=37%, list=19%, signal=45%
GO_PROTEIN_ALKYLATION	GO_PROTEIN_ALKYLATION		95	0.395335	1.55485	0.0351967	0.135969	0.997	7010	tags=40%, list=22%, signal=51%
GO_POST_TRANSLATIONAL_PROTEIN_MODIFICATION	GO_POST_TRANSLATIONAL_PROTEIN_MODIFICATION		35	0.47884	1.55412	0.0460653	0.13638	0.997	4416	tags=34%, list=14%, signal=40%
GO_ACID_AMINO_ACID_LIGASE_ACTIVITY	GO_ACID_AMINO_ACID_LIGASE_ACTIVITY		18	0.490828	1.5541	0.0390625	0.136205	0.997	8139	tags=61%, list=26%, signal=82%
GO_NUCLEOBASE_CONTAINING_COMPOUND_KINASE_ACTIVITY	GO_NUCLEOBASE_CONTAINING_COMPOUND_KINASE_ACTIVITY		46	0.435657	1.55345	0.0255403	0.136561	0.997	7574	tags=52%, list=24%, signal=68%
GO_REGULATION_OF_PROTEIN_IMPORT_INTO_NUCLEUS_TRANSLOCATION	GO_REGULATION_OF_PROTEIN_IMPORT_INTO_NUCLEUS_TRANSLOCATION		21	0.492919	1.55113	0.0434783	0.138389	0.997	5171	tags=43%, list=16%, signal=51%
GO_CYTOPLASMIC_MRNA_PROCESSING_BODY	GO_CYTOPLASMIC_MRNA_PROCESSING_BODY		61	0.420933	1.55016	0.0372549	0.139094	0.998	7748	tags=43%, list=24%, signal=56%
GO_APOPTOTIC_MITOCHONDRIAL_CHANGES	GO_APOPTOTIC_MITOCHONDRIAL_CHANGES		56	0.423518	1.5497	0.0438931	0.139348	0.998	5785	tags=41%, list=18%, signal=50%
GO_LUNG_CELL_DIFFERENTIATION	GO_LUNG_CELL_DIFFERENTIATION		25	0.52366	1.54964	0.0482625	0.139224	0.998	5381	tags=44%, list=17%, signal=53%
GO_HISTONE_DEACETYLASE_BINDING	GO_HISTONE_DEACETYLASE_BINDING		102	0.368332	1.54957	0.0306122	0.139105	0.998	6878	tags=41%, list=22%, signal=52%
GO_REGULATION_OF_PROTEIN_COMPLEX_ASSEMBLY	GO_REGULATION_OF_PROTEIN_COMPLEX_ASSEMBLY		353	0.344425	1.54812	0.0226843	0.139999	0.998	6949	tags=37%, list=22%, signal=47%
GO_SWI_SNF_SUPERFAMILY_TYPE_COMPLEX	GO_SWI_SNF_SUPERFAMILY_TYPE_COMPLEX		71	0.411907	1.5478	0.0439771	0.140118	0.998	5651	tags=34%, list=18%, signal=41%
GO_EMBRYONIC_DIGIT_MORPHOGENESIS	GO_EMBRYONIC_DIGIT_MORPHOGENESIS		59	0.435993	1.54675	0.0433925	0.140699	0.999	3987	tags=31%, list=13%, signal=35%
GO_CELLULAR_COMPONENT_MAINTENANCE	GO_CELLULAR_COMPONENT_MAINTENANCE		18	0.501498	1.54218	0.0411255	0.143168	0.999	1276	tags=28%, list=4%, signal=29%
GO_DIOXYGENASE_ACTIVITY	GO_DIOXYGENASE_ACTIVITY		80	0.374742	1.54212	0.0176125	0.143032	0.999	5713	tags=34%, list=18%, signal=41%
GO_PROTEIN_ACYLATION	GO_PROTEIN_ACYLATION		142	0.363134	1.54112	0.028169	0.143818	0.999	5625	tags=32%, list=18%, signal=39%
GO_TOXIN_TRANSPORT	GO_TOXIN_TRANSPORT		36	0.461728	1.54005	0.0414938	0.144622	0.999	5740	tags=42%, list=18%, signal=51%
GO_INTESTINAL_EPITHELIAL_CELL_DIFFERENTIATION	GO_INTESTINAL_EPITHELIAL_CELL_DIFFERENTIATION		16	0.572477	1.54001	0.042	0.144477	0.999	4475	tags=44%, list=14%, signal=51%
GO_NEURON_DEATH	GO_NEURON_DEATH		44	0.411508	1.53993	0.0326296	0.144357	0.999	1850	tags=23%, list=6%, signal=24%
GO_PROTEIN_C_TERMINUS_BINDING	GO_PROTEIN_C_TERMINUS_BINDING		182	0.343138	1.53832	0.0214844	0.145213	0.999	6056	tags=31%, list=19%, signal=38%
GO_INTERACTION_WITH_HOST	GO_INTERACTION_WITH_HOST		127	0.402926	1.53663	0.0383142	0.146036	0.999	4713	tags=33%, list=15%, signal=39%
GO_TRANSFERASE_ACTIVITY_TRANSFERRING_ACYL_GROUPS_OTHER_THAN_AMINO_ACYL_GROUPS	GO_TRANSFERASE_ACTIVITY_TRANSFERRING_ACYL_GROUPS_OTHER_THAN_AMINO_ACYL_GROUPS		195	0.353595	1.53532	0.0297619	0.146702	0.999	5845	tags=32%, list=18%, signal=39%
GO_RHO_GTPASE_BINDING	GO_RHO_GTPASE_BINDING		76	0.407496	1.5351	0.0321285	0.146739	0.999	3397	tags=26%, list=11%, signal=29%
GO_CELL_CYCLE_ARREST	GO_CELL_CYCLE_ARREST		141	0.358998	1.53198	0.0287908	0.148253	1	5408	tags=32%, list=17%, signal=38%
GO_HAIR_CELL_DIFFERENTIATION	GO_HAIR_CELL_DIFFERENTIATION		34	0.431707	1.52767	0.0321285	0.151846	1	6513	tags=50%, list=20%, signal=63%
GO_N_ACETYLTRANSFERASE_ACTIVITY	GO_N_ACETYLTRANSFERASE_ACTIVITY		76	0.403174	1.5275	0.0470588	0.151622	1	5625	tags=36%, list=18%, signal=43%
GO_MORPHOGENESIS_OF_AN_EPITHELIUM	GO_MORPHOGENESIS_OF_AN_EPITHELIUM		388	0.353938	1.5268	0.0262097	0.152053	1	5453	tags=31%, list=17%, signal=37%
GO_TRANSFERASE_ACTIVITY_TRANSFERRING_ACYL_GROUPS	GO_TRANSFERASE_ACTIVITY_TRANSFERRING_ACYL_GROUPS		229	0.344181	1.52627	0.0177515	0.15234	1	5845	tags=31%, list=18%, signal=38%
GO_RESPONSE_TO_TESTOSTERONE	GO_RESPONSE_TO_TESTOSTERONE		37	0.422693	1.52529	0.0327198	0.152512	1	6259	tags=41%, list=20%, signal=50%
GO_CONNEXON_COMPLEX	GO_CONNEXON_COMPLEX		18	0.508172	1.52292	0.0365112	0.154274	1	2239	tags=33%, list=7%, signal=36%
GO_SKELETAL_MUSCLE_TISSUE_REGENERATION	GO_SKELETAL_MUSCLE_TISSUE_REGENERATION		21	0.4684	1.52274	0.0325203	0.154238	1	6117	tags=38%, list=19%, signal=47%
GO_REGULATION_OF_OLIGODENDROCYTE_DIFFERENTIATION	GO_REGULATION_OF_OLIGODENDROCYTE_DIFFERENTIATION		27	0.484049	1.52016	0.0380952	0.155744	1	7109	tags=56%, list=22%, signal=72%
GO_NEURON_APOPTOTIC_PROCESS	GO_NEURON_APOPTOTIC_PROCESS		34	0.440758	1.51979	0.0371094	0.155728	1	1850	tags=24%, list=6%, signal=25%
GO_APOPTOTIC_NUCLEAR_CHANGES	GO_APOPTOTIC_NUCLEAR_CHANGES		24	0.453767	1.51964	0.0484848	0.155702	1	4449	tags=38%, list=14%, signal=44%
GO_TRANSFERASE_ACTIVITY_TRANSFERRING_GLYCOSYL_GROUPS	GO_TRANSFERASE_ACTIVITY_TRANSFERRING_GLYCOSYL_GROUPS		257	0.351028	1.51681	0.0245747	0.158293	1	6080	tags=33%, list=19%, signal=41%
GO_INTRINSIC_APOPTOTIC_SIGNALING_PATHWAY_BY_P53_CLASS_MEDIATOR	GO_INTRINSIC_APOPTOTIC_SIGNALING_PATHWAY_BY_P53_CLASS_MEDIATOR		52	0.379804	1.51562	0.0223577	0.158792	1	5360	tags=31%, list=17%, signal=37%
GO_FEMALE_GAMETE_GENERATION	GO_FEMALE_GAMETE_GENERATION		86	0.35464	1.51496	0.00567108	0.15924	1	2886	tags=20%, list=9%, signal=22%
GO_POSITIVE_REGULATION_OF_WNT_SIGNALING_PATHWAY	GO_POSITIVE_REGULATION_OF_WNT_SIGNALING_PATHWAY		148	0.387286	1.51362	0.0340681	0.159294	1	5657	tags=36%, list=18%, signal=44%
GO_POSITIVE_REGULATION_OF_CELL_CYCLE_G2_M_PHASE_TRANSITION	GO_POSITIVE_REGULATION_OF_CELL_CYCLE_G2_M_PHASE_TRANSITION		18	0.489172	1.51195	0.0449219	0.160545	1	5616	tags=56%, list=18%, signal=67%
GO_CELLULAR_CARBOHYDRATE_METABOLIC_PROCESS	GO_CELLULAR_CARBOHYDRATE_METABOLIC_PROCESS		136	0.378768	1.51151	0.0319361	0.16076	1	4582	tags=30%, list=14%, signal=35%
GO_ORGANOPHOSPHATE_BIOSYNTHETIC_PROCESS	GO_ORGANOPHOSPHATE_BIOSYNTHETIC_PROCESS		424	0.325286	1.51039	0.0171103	0.161237	1	4814	tags=26%, list=15%, signal=30%
GO_CELL_CELL_JUNCTION	GO_CELL_CELL_JUNCTION		359	0.348983	1.50745	0.0320641	0.162977	1	4751	tags=32%, list=15%, signal=38%
GO_POSITIVE_REGULATION_OF_PROTEIN_COMPLEX_ASSEMBLY	GO_POSITIVE_REGULATION_OF_PROTEIN_COMPLEX_ASSEMBLY		184	0.345779	1.50516	0.0263653	0.164642	1	6949	tags=37%, list=22%, signal=47%
GO_HEXOSE_CATABOLIC_PROCESS	GO_HEXOSE_CATABOLIC_PROCESS		44	0.473945	1.503	0.043659	0.166378	1	3634	tags=32%, list=11%, signal=36%
GO_WNT_SIGNALING_PATHWAY	GO_WNT_SIGNALING_PATHWAY		332	0.355967	1.50283	0.0349794	0.166355	1	5112	tags=33%, list=16%, signal=38%
GO_FEMALE_GENITALIA_DEVELOPMENT	GO_FEMALE_GENITALIA_DEVELOPMENT		16	0.520089	1.50157	0.0480962	0.167408	1	4495	tags=56%, list=14%, signal=65%
GO_POSITIVE_REGULATION_OF_APOPTOTIC_SIGNALING_PATHWAY	GO_POSITIVE_REGULATION_OF_APOPTOTIC_SIGNALING_PATHWAY		166	0.355244	1.50094	0.0483559	0.1674	1	5962	tags=34%, list=19%, signal=41%
GO_NEURAL_PRECURSOR_CELL_PROLIFERATION	GO_NEURAL_PRECURSOR_CELL_PROLIFERATION		70	0.389824	1.49933	0.0350195	0.168531	1	3423	tags=23%, list=11%, signal=26%
GO_MAMMARY_GLAND_DEVELOPMENT	GO_MAMMARY_GLAND_DEVELOPMENT		113	0.358094	1.49856	0.0299401	0.168905	1	5430	tags=34%, list=17%, signal=40%
GO_REGULATION_OF_CYSTEINE_TYPE_ENDOPEPTIDASE_ACTIVITY	GO_REGULATION_OF_CYSTEINE_TYPE_ENDOPEPTIDASE_ACTIVITY		206	0.34453	1.49736	0.0339623	0.169671	1	6522	tags=36%, list=21%, signal=46%
GO_MEMBRANE_LIPID_BIOSYNTHETIC_PROCESS	GO_MEMBRANE_LIPID_BIOSYNTHETIC_PROCESS		106	0.375279	1.49418	0.0281955	0.172232	1	5932	tags=39%, list=19%, signal=47%
GO_REGULATION_OF_APOPTOTIC_SIGNALING_PATHWAY	GO_REGULATION_OF_APOPTOTIC_SIGNALING_PATHWAY		347	0.334751	1.48863	0.0333333	0.17563	1	7560	tags=39%, list=24%, signal=51%
GO_PROTEIN_POLYMERIZATION	GO_PROTEIN_POLYMERIZATION		64	0.38146	1.48796	0.0421456	0.175658	1	2298	tags=23%, list=7%, signal=25%
GO_REGULATION_OF_PROTEIN_STABILITY	GO_REGULATION_OF_PROTEIN_STABILITY		211	0.345174	1.48701	0.0393701	0.17643	1	6373	tags=34%, list=20%, signal=42%
GO_NEGATIVE_REGULATION_OF_EPITHELIAL_CELL_DIFFERENTIATION	GO_NEGATIVE_REGULATION_OF_EPITHELIAL_CELL_DIFFERENTIATION		37	0.412862	1.48567	0.048	0.17757	1	2377	tags=27%, list=7%, signal=29%
GO_MAGNESIUM_ION_BINDING	GO_MAGNESIUM_ION_BINDING		188	0.353685	1.48533	0.0399202	0.177523	1	6392	tags=34%, list=20%, signal=42%
GO_REGULATION_OF_BINDING	GO_REGULATION_OF_BINDING		280	0.331486	1.48403	0.02	0.178198	1	5129	tags=30%, list=16%, signal=35%
GO_CELLULAR_PROCESS_INVOLVED_IN_REPRODUCTION_IN_MULTICELLULAR_ORGANISM	GO_CELLULAR_PROCESS_INVOLVED_IN_REPRODUCTION_IN_MULTICELLULAR_ORGANISM		210	0.312846	1.48306	0.00580271	0.178933	1	3355	tags=20%, list=11%, signal=23%
GO_CARBOHYDRATE_BIOSYNTHETIC_PROCESS	GO_CARBOHYDRATE_BIOSYNTHETIC_PROCESS		117	0.374881	1.48068	0.0496183	0.181008	1	5536	tags=34%, list=17%, signal=41%
GO_ECTODERM_DEVELOPMENT	GO_ECTODERM_DEVELOPMENT		20	0.45517	1.47891	0.0368217	0.182509	1	4094	tags=40%, list=13%, signal=46%
GO_MAINTENANCE_OF_CELL_NUMBER	GO_MAINTENANCE_OF_CELL_NUMBER		126	0.356581	1.47696	0.0475248	0.18371	1	5979	tags=33%, list=19%, signal=40%
GO_INTERMEDIATE_FILAMENT_CYTOSKELETON	GO_INTERMEDIATE_FILAMENT_CYTOSKELETON		138	0.358335	1.47622	0.0426829	0.184069	1	5015	tags=33%, list=16%, signal=39%
GO_POSITIVE_REGULATION_OF_PEPTIDASE_ACTIVITY	GO_POSITIVE_REGULATION_OF_PEPTIDASE_ACTIVITY		149	0.356063	1.47576	0.042471	0.184104	1	6949	tags=42%, list=22%, signal=53%
GO_PROTEIN_OLIGOMERIZATION	GO_PROTEIN_OLIGOMERIZATION		410	0.304072	1.47342	0.0115163	0.185673	1	5300	tags=26%, list=17%, signal=31%
GO_REGULATION_OF_PROTEIN_LOCALIZATION_TO_NUCLEUS	GO_REGULATION_OF_PROTEIN_LOCALIZATION_TO_NUCLEUS		212	0.333107	1.47281	0.0322581	0.185676	1	5365	tags=29%, list=17%, signal=34%
GO_REGULATION_OF_FIBROBLAST_PROLIFERATION	GO_REGULATION_OF_FIBROBLAST_PROLIFERATION		80	0.363139	1.47177	0.044898	0.186142	1	5381	tags=31%, list=17%, signal=38%
GO_METHYLATION	GO_METHYLATION		241	0.346791	1.4708	0.0490798	0.186957	1	7010	tags=35%, list=22%, signal=44%
GO_EPITHELIAL_CELL_DIFFERENTIATION	GO_EPITHELIAL_CELL_DIFFERENTIATION		455	0.31323	1.46918	0.0214844	0.188041	1	5398	tags=29%, list=17%, signal=34%
GO_GERM_CELL_DEVELOPMENT	GO_GERM_CELL_DEVELOPMENT		174	0.308332	1.46653	0.0114723	0.190085	1	3257	tags=20%, list=10%, signal=22%
GO_REGULATION_OF_EPIDERMAL_CELL_DIFFERENTIATION	GO_REGULATION_OF_EPIDERMAL_CELL_DIFFERENTIATION		42	0.415607	1.46082	0.046875	0.194285	1	7472	tags=43%, list=24%, signal=56%
GO_NEGATIVE_REGULATION_OF_CATABOLIC_PROCESS	GO_NEGATIVE_REGULATION_OF_CATABOLIC_PROCESS		193	0.326595	1.45803	0.0477099	0.19578	1	5359	tags=28%, list=17%, signal=33%
GO_NEGATIVE_REGULATION_OF_APOPTOTIC_SIGNALING_PATHWAY	GO_NEGATIVE_REGULATION_OF_APOPTOTIC_SIGNALING_PATHWAY		189	0.346501	1.45298	0.0494071	0.199291	1	6779	tags=38%, list=21%, signal=47%
GO_REGULATION_OF_PROTEIN_BINDING	GO_REGULATION_OF_PROTEIN_BINDING		167	0.336192	1.45149	0.0354331	0.200227	1	4778	tags=31%, list=15%, signal=36%
GO_EPITHELIAL_CELL_PROLIFERATION	GO_EPITHELIAL_CELL_PROLIFERATION		86	0.370641	1.44153	0.0316206	0.207185	1	4376	tags=31%, list=14%, signal=36%
GO_REGULATION_OF_DNA_BINDING	GO_REGULATION_OF_DNA_BINDING		93	0.351348	1.43659	0.0401606	0.211471	1	6909	tags=37%, list=22%, signal=47%
GO_AGING	GO_AGING		253	0.314966	1.42652	0.0423077	0.220034	1	4238	tags=26%, list=13%, signal=29%
GO_NEGATIVE_REGULATION_OF_PROTEOLYSIS	GO_NEGATIVE_REGULATION_OF_PROTEOLYSIS		304	0.302843	1.38628	0.0439771	0.248336	1	5518	tags=27%, list=17%, signal=32%

## Sheet: Table S2
NAME	GS<br> follow link to MSigDB	GS DETAILS	SIZE	ES	NES	NOM p-val	FDR q-val	FWER p-val	RANK AT MAX	LEADING EDGE
KEGG_CELL_CYCLE	KEGG_CELL_CYCLE	Details ...	124	0.712731	2.36563	<0.0001	0	0	2377	tags=48%, list=7%, signal=51%
KEGG_HOMOLOGOUS_RECOMBINATION	KEGG_HOMOLOGOUS_RECOMBINATION	Details ...	27	0.776615	2.22838	<0.0001	0.00153977	0.003	1505	tags=48%, list=5%, signal=50%
KEGG_P53_SIGNALING_PATHWAY	KEGG_P53_SIGNALING_PATHWAY	Details ...	66	0.607228	2.21948	<0.0001	0.00102652	0.003	2311	tags=39%, list=7%, signal=42%
KEGG_NUCLEOTIDE_EXCISION_REPAIR	KEGG_NUCLEOTIDE_EXCISION_REPAIR	Details ...	44	0.685364	2.08451	0.00206186	0.00655217	0.018	5129	tags=59%, list=16%, signal=70%
KEGG_DNA_REPLICATION	KEGG_DNA_REPLICATION	Details ...	36	0.817113	2.06952	0.0021097	0.00667956	0.023	1706	tags=67%, list=5%, signal=70%
KEGG_OOCYTE_MEIOSIS	KEGG_OOCYTE_MEIOSIS	Details ...	107	0.544039	2.02329	<0.0001	0.0104604	0.039	3778	tags=37%, list=12%, signal=42%
KEGG_MISMATCH_REPAIR	KEGG_MISMATCH_REPAIR	Details ...	23	0.778906	2.00867	<0.0001	0.010617	0.047	5093	tags=78%, list=16%, signal=93%
KEGG_PYRIMIDINE_METABOLISM	KEGG_PYRIMIDINE_METABOLISM	Details ...	95	0.573518	1.97528	0.00409836	0.013292	0.065	4530	tags=41%, list=14%, signal=48%
KEGG_UBIQUITIN_MEDIATED_PROTEOLYSIS	KEGG_UBIQUITIN_MEDIATED_PROTEOLYSIS	Details ...	133	0.509241	1.93975	0.00199601	0.018098	0.093	6261	tags=46%, list=20%, signal=57%
KEGG_BASE_EXCISION_REPAIR	KEGG_BASE_EXCISION_REPAIR	Details ...	34	0.67798	1.88882	0.00631579	0.0305261	0.152	5190	tags=56%, list=16%, signal=67%
KEGG_PROGESTERONE_MEDIATED_OOCYTE_MATURATION	KEGG_PROGESTERONE_MEDIATED_OOCYTE_MATURATION	Details ...	83	0.493206	1.88702	<0.0001	0.0280579	0.154	2396	tags=27%, list=8%, signal=29%
KEGG_RNA_DEGRADATION	KEGG_RNA_DEGRADATION	Details ...	55	0.578684	1.85825	0.01002	0.0356788	0.187	5905	tags=53%, list=19%, signal=65%
KEGG_SPLICEOSOME	KEGG_SPLICEOSOME	Details ...	123	0.551668	1.80231	0.0207469	0.0627831	0.288	5440	tags=46%, list=17%, signal=55%
KEGG_SMALL_CELL_LUNG_CANCER	KEGG_SMALL_CELL_LUNG_CANCER	Details ...	84	0.497095	1.79442	0.00392927	0.0617856	0.298	2828	tags=33%, list=9%, signal=36%
KEGG_BLADDER_CANCER	KEGG_BLADDER_CANCER	Details ...	40	0.520604	1.7745	0.00403226	0.0696799	0.335	6146	tags=43%, list=19%, signal=53%
KEGG_PANCREATIC_CANCER	KEGG_PANCREATIC_CANCER	Details ...	69	0.501208	1.76089	0.00994036	0.074694	0.363	2363	tags=30%, list=7%, signal=33%
KEGG_AMINOACYL_TRNA_BIOSYNTHESIS	KEGG_AMINOACYL_TRNA_BIOSYNTHESIS	Details ...	41	0.654952	1.75732	0.0162933	0.0726708	0.373	4642	tags=56%, list=15%, signal=66%
KEGG_ONE_CARBON_POOL_BY_FOLATE	KEGG_ONE_CARBON_POOL_BY_FOLATE	Details ...	17	0.624956	1.71987	0.010395	0.094307	0.443	3079	tags=47%, list=10%, signal=52%
KEGG_BASAL_TRANSCRIPTION_FACTORS	KEGG_BASAL_TRANSCRIPTION_FACTORS	Details ...	33	0.528766	1.70678	0.0143149	0.0990351	0.472	6113	tags=45%, list=19%, signal=56%
KEGG_PROTEASOME	KEGG_PROTEASOME	Details ...	43	0.690334	1.70445	0.039916	0.0961178	0.478	6384	tags=67%, list=20%, signal=84%
KEGG_PENTOSE_PHOSPHATE_PATHWAY	KEGG_PENTOSE_PHOSPHATE_PATHWAY	Details ...	25	0.601085	1.70426	0.0164609	0.0915892	0.478	5536	tags=48%, list=17%, signal=58%
KEGG_THYROID_CANCER	KEGG_THYROID_CANCER	Details ...	29	0.515815	1.67247	0.0329218	0.111728	0.53	3131	tags=34%, list=10%, signal=38%
KEGG_SYSTEMIC_LUPUS_ERYTHEMATOSUS	KEGG_SYSTEMIC_LUPUS_ERYTHEMATOSUS	Details ...	116	0.476769	1.63805	0.0336634	0.13587	0.602	6210	tags=51%, list=20%, signal=63%
KEGG_PATHWAYS_IN_CANCER	KEGG_PATHWAYS_IN_CANCER	Details ...	319	0.363029	1.54127	0.0337711	0.230283	0.754	5121	tags=31%, list=16%, signal=37%
KEGG_PURINE_METABOLISM	KEGG_PURINE_METABOLISM	Details ...	150	0.356713	1.53051	0.0483871	0.235585	0.773	3786	tags=25%, list=12%, signal=29%
KEGG_AXON_GUIDANCE	KEGG_AXON_GUIDANCE	Details ...	126	0.38502	1.51766	0.0412574	0.226953	0.791	4214	tags=34%, list=13%, signal=39%
KEGG_NOTCH_SIGNALING_PATHWAY	KEGG_NOTCH_SIGNALING_PATHWAY	Details ...	47	0.427253	1.51079	0.0453649	0.228251	0.801	3987	tags=36%, list=13%, signal=41%
KEGG_GLIOMA	KEGG_GLIOMA	Details ...	65	0.413993	1.50117	0.0490798	0.218672	0.816	2604	tags=23%, list=8%, signal=25%
